# Supplementary material for: The Saccharomyces cerevisiae acetyltransferase Gcn5 exerts antagonistic pleiotropic effects on chronological ageing
Source: Aging (Albany NY). 2023 Oct 23;15(20):10915–37. doi: 10.18632/aging.205109 (PMC10637828; doi:10.18632/aging.205109)
Supplement: Supplementary Table 1 [file aging-15-205109-s002.xlsx]

## Sheet: foldchange>=2 genes (n=594)
Supplementary Table 1. The list of GCN5-regulated genes in the seven clusters in Figure 4A.
	GeneID	baseMean	log2FoldChange	lfcSE	pvalue	padj	GeneName	Description	Chromosome	Start	Stop	Strand	Entrez_ID
213	tF(GAA)H1	64.6317	-7.4418	2.85866	3.80906e-06	5.66027e-05	NA	NA	NA	NA	NA	NA	856469
265	tI(UAU)L	5.03097	-6.45004	2.90794	6.68567e-05	0.000660837	NA	NA	NA	NA	NA	NA	850931
3527	YIL057C	10511.2	-5.947	1.14331	NA	NA	RGI2	Protein of unknown function%3B involved in energy metabolism under respiratory conditions%3B expression induced under carbon limitation and repressed under high glucose%3B RGI2 has a paralog%2C RGI1%2C that arose from the whole genome duplication [Source	IX	247902	248396	-	854753
5146	YML089C	94.8181	-4.87245	0.931271	1.02688e-08	3.0912e-07	NA	Dubious open reading frame%3B unlikely to encode a functional protein%2C based on available experimental and comparative sequence data%3B expression induced by calcium shortage [Source:SGD%3BAcc:S000004554]	XIII	91041	91409	-	NA
6162	YOL152W	6357.06	-4.79147	0.345784	6.32606e-45	1.04111e-41	FRE7	Putative ferric reductase with similarity to Fre2p%3B expression induced by low copper levels [Source:SGD%3BAcc:S000005512]	XV	40748	42610	+	854013
2064	YDR536W	4737.5	-4.78634	0.422053	4.32612e-31	2.19068e-28	STL1	Glycerol proton symporter of the plasma membrane%3B subject to glucose-induced inactivation%2C strongly but transiently induced when cells are subjected to osmotic shock [Source:SGD%3BAcc:S000002944]	IV	1508005	1509714	+	852149
3316	YHR096C	24484.1	-4.23104	0.631663	1.04828e-12	7.93201e-11	HXT5	Hexose transporter with moderate affinity for glucose%3B induced in the presence of non-fermentable carbon sources%2C induced by a decrease in growth rate%2C contains an extended N-terminal domain relative to other HXTs%3B HXT5 has a paralog%2C HXT3%2C t	VIII	294669	296447	-	856496
400	tT(AGU)H	7.69016	-4.21288	2.14983	0.00162164	0.00950651	NA	NA	NA	NA	NA	NA	856396
252	tI(AAU)E1	9.17631	-4.13969	1.72852	0.000666059	0.00456394	NA	NA	NA	NA	NA	NA	856878
156	tA(AGC)H	5.32488	-4.05673	3.23179	0.00348584	0.0176518	NA	NA	NA	NA	NA	NA	856414
442	tX(XXX)L	7.16498	-4.04483	1.34565	0.0001519	0.00130885	NA	NA	NA	NA	NA	NA	851038
352	tQ(UUG)E1	5.9986	-3.97742	1.95835	0.00177742	0.0102549	NA	NA	NA	NA	NA	NA	856773
6589	YOR382W	10002.9	-3.95188	0.53062	5.03527e-15	6.02677e-13	FIT2	Mannoprotein that is incorporated into the cell wall%3B incorporated via a glycosylphosphatidylinositol (GPI) anchor%3B involved in the retention of siderophore-iron in the cell wall [Source:SGD%3BAcc:S000005909]	XV	1059531	1059992	+	854564
5865	YNL289W	2334.54	-3.93322	1.07321	1.03777e-05	0.00013636	PCL1	Cyclin%2C interacts with cyclin-dependent kinase Pho85p%3B member of the Pcl1%2C2-like subfamily%2C involved in the regulation of polarized growth and morphogenesis and progression through the cell cycle%3B is ubiquitinated by Dma1p%3B phosphorylation by	XIV	87897	88736	+	855427
4677	YLR142W	3077.58	-3.89928	0.2344	2.16677e-63	1.42638e-59	PUT1	Proline oxidase%3B nuclear-encoded mitochondrial protein involved in utilization of proline as sole nitrogen source%3B PUT1 transcription is induced by Put3p in the presence of proline and the absence of a preferred nitrogen source [Source:SGD%3BAcc:S000	XII	425186	426616	+	850833
371	tR(UCU)G3	49.4726	-3.69507	0.870182	1.07255e-06	1.91864e-05	NA	NA	NA	NA	NA	NA	853022
4450	YKR097W	86303	-3.67687	1.21974	NA	NA	PCK1	Phosphoenolpyruvate carboxykinase%3B key enzyme in gluconeogenesis%2C catalyzes early reaction in carbohydrate biosynthesis%2C glucose represses transcription and accelerates mRNA degradation%2C regulated by Mcm1p and Cat8p%2C located in the cytosol [Sou	XI	631152	632801	+	853972
5107	YML054C	24343	-3.61531	0.39723	4.82462e-21	1.09519e-18	CYB2	Cytochrome b2 (L-lactate cytochrome-c oxidoreductase)%3B component of the mitochondrial intermembrane space%2C required for lactate utilization%3B expression is repressed by glucose and anaerobic conditions [Source:SGD%3BAcc:S000004518]	XIII	165533	167308	-	854950
6836	YPL223C	7202.49	-3.60114	0.372608	2.31988e-23	6.94172e-21	GRE1	Hydrophilin essential in desiccation-rehydration process%3B stress induced (osmotic%2C ionic%2C oxidative%2C heat shock and heavy metals)%3B regulated by the HOG pathway%3B GRE1 has a paralog%2C SIP18%2C that arose from the whole genome duplication [Sour	XVI	128632	129138	-	855878
523	YAL062W	5423.54	-3.51023	0.306007	1.0387e-31	6.21617e-29	GDH3	NADP(+)-dependent glutamate dehydrogenase%3B synthesizes glutamate from ammonia and alpha-ketoglutarate%3B rate of alpha-ketoglutarate utilization differs from Gdh1p%3B expression regulated by nitrogen and carbon sources%3B GDH3 has a paralog%2C GDH1%2C	I	31567	32940	+	851237
3593	YIL117C	2272.69	-3.4876	0.263668	3.8538e-41	5.07391e-38	PRM5	Pheromone-regulated protein%2C predicted to have 1 transmembrane segment%3B induced during cell integrity signaling%3B PRM5 has a paralog%2C YNL058C%2C that arose from the whole genome duplication [Source:SGD%3BAcc:S000001379]	IX	140613	141569	-	854689
4314	YKL187C	5827.68	-3.47022	0.248438	1.38899e-45	3.04791e-42	FAT3	Protein required for fatty acid uptake%3B protein abundance increases in cortical patches in response to oleate exposure%3B the authentic%2C non-tagged protein is detected in a phosphorylated state in highly purified mitochondria in high-throughput studi	XI	89284	91536	-	853648
2118	YEL035C	59.3305	-3.45526	0.663051	1.02836e-08	3.0912e-07	UTR5	Protein of unknown function%3B transcription may be regulated by Gcr1p%3B essential for growth under standard (aerobic) conditions but not under anaerobic conditions [Source:SGD%3BAcc:S000000761]	V	85045	85545	-	856676
4215	YKL096W	1946.33	-3.431	0.490109	1.37146e-13	1.28976e-11	CWP1	Cell wall mannoprotein that localizes to birth scars of daughter cells%3B linked to a beta-1%2C3- and beta-1%2C6-glucan heteropolymer through a phosphodiester bond%3B required for propionic acid resistance [Source:SGD%3BAcc:S000001579]	XI	261132	261851	+	853766
6062	YOL058W	5429.96	-3.40668	0.571494	1.30098e-10	6.58794e-09	ARG1	Arginosuccinate synthetase%3B catalyzes the formation of L-argininosuccinate from citrulline and L-aspartate in the arginine biosynthesis pathway%3B potential Cdc28p substrate [Source:SGD%3BAcc:S000005419]	XV	219211	220473	+	854096
6813	YPL201C	4594.42	-3.36719	0.54287	2.89877e-11	1.78342e-09	YIG1	Protein that interacts with glycerol 3-phosphatase%3B plays a role in anaerobic glycerol production%3B localizes to the nucleus and cytosol [Source:SGD%3BAcc:S000006122]	XVI	169770	171155	-	855900
2344	YER145C-A	60.6689	-3.36059	0.564441	1.45114e-10	7.23702e-09	NA	Putative protein of unknown function%3B conserved among S. cerevisiae strains%3B overlaps verified ORF LSM5/YER146W [Source:SGD%3BAcc:S000028758]	V	462386	462823	-	31009439
5556	YMR322C	528.691	-3.30748	0.560949	6.30085e-10	2.57135e-08	SNO4	Possible chaperone and cysteine protease%3B required for transcriptional reprogramming during the diauxic shift and for survival in stationary phase%3B similar to bacterial Hsp31 and yeast Hsp31p%2C Hsp32p%2C and Hsp33p%3B DJ-1/ThiJ/PfpI superfamily memb	XIII	918366	919079	-	855372
5325	YMR118C	2324.58	-3.24694	0.208201	4.90222e-56	1.61356e-52	SHH3	Putative mitochondrial inner membrane protein of unknown function%3B although similar to paralogous Sdh3p%2C Shh3p is not a stoichiometric subunit of either succinate dehydrogenase or of the TIM22 translocase%3B SHH3 has a paralog%2C SDH3%2C that arose f	XIII	502144	502734	-	855145
170	tC(GCA)B	5.41517	-3.20195	1.96606	0.00334974	0.0171472	NA	NA	NA	NA	NA	NA	852509
2142	YEL057C	594.213	-3.17789	0.376402	1.63539e-18	3.07594e-16	SDD1	Protein of unknown function%3B overproduction suppresses lethality due to expression of the dominant PET9 allele AAC2-A128P%3B may have a role in telomere maintenance%3B target of UME6 regulation [Source:SGD%3BAcc:S000000783]	V	45020	45721	-	856653
514	YAL054C	14951	-3.1729	0.635217	2.9366e-08	7.98829e-07	ACS1	Acetyl-coA synthetase isoform%3B along with Acs2p%2C acetyl-coA synthetase isoform is the nuclear source of acetyl-coA for histone acetylation%3B expressed during growth on nonfermentable carbon sources and under aerobic conditions [Source:SGD%3BAcc:S000	I	42881	45022	-	851245
5531	YMR303C	3348.61	-3.16487	0.517817	5.26247e-11	2.93584e-09	ADH2	Glucose-repressible alcohol dehydrogenase II%3B catalyzes the conversion of ethanol to acetaldehyde%3B involved in the production of certain carboxylate esters%3B regulated by ADR1 [Source:SGD%3BAcc:S000004918]	XIII	873291	874337	-	855349
4182	YKL065W-A	7652.1	-3.04839	0.35188	2.55807e-19	5.26242e-17	NA	Putative protein of unknown function%3B SWAT-GFP fusion protein localizes to the endoplasmic reticulum (ER) while mCherry fusion localizes to both the ER and vacuole [Source:SGD%3BAcc:S000113563]	XI	315954	316175	+	3799975
5574	YNL014W	3917.32	-2.97505	0.306452	1.61977e-23	5.07761e-21	HEF3	Translational elongation factor EF-3%3B member of the ABC superfamily%3B stimulates EF-1 alpha-dependent binding of aminoacyl-tRNA by the ribosome%3B normally expressed in zinc deficient cells%3B HEF3 has a paralog%2C YEF3%2C that arose from the whole ge	XIV	606319	609453	+	855718
5261	YMR057C	54.0631	-2.94469	0.675059	6.64586e-07	1.2708e-05	NA	Dubious open reading frame%3B unlikely to encode a functional protein%2C based on available experimental and comparative sequence data%3B partially overlaps verified ORF AAC1 [Source:SGD%3BAcc:S000004661]	XIII	388359	388730	-	NA
4947	YLR377C	36368	-2.88717	1.71408	NA	NA	FBP1	Fructose-1%2C6-bisphosphatase%3B key regulatory enzyme in the gluconeogenesis pathway%2C required for glucose metabolism%3B undergoes either proteasome-mediated or autophagy-mediated degradation depending on growth conditions%3B glucose starvation result	XII	873746	874792	-	851092
4858	YLR296W	73.8195	-2.8826	0.508033	8.1369e-10	3.2075e-08	NA	Putative protein of unknown function%3B conserved across S. cerevisiae strains [Source:SGD%3BAcc:S000004287]	XII	722978	723304	+	851003
2551	YGL007C-A	55.3083	-2.8522	0.37919	3.77858e-15	4.60637e-13	NA	Putative protein of unknown function%3B identified by gene-trapping%2C microarray-based expression analysis%2C and genome-wide homology searching%3B deletion exhibits slow-growth phenotype%3B computationally predicted to have a role in cell budding [Sour	VII	482941	483027	-	1466455
394	tS(UGA)I	22.3195	-2.83564	0.843207	3.81553e-05	0.000407754	NA	NA	NA	NA	NA	NA	854754
4876	YLR312C	3835.42	-2.81694	0.291463	2.47583e-23	7.08625e-21	NA	Autophagy receptor with a role in degradation of the ER and nucleus%3B involved specifically in autophagy of perinuclear endoplasmic reticulum in response to nitrogen starvation or rapamycin treatment%3B localizes to the perinuclear ER [Source:SGD%3BAcc:	XII	757637	758833	-	851021
6897	YPL280W	1326.3	-2.80025	0.301494	1.51124e-21	3.55304e-19	HSP32	Possible chaperone and cysteine protease%3B required for transcriptional reprogramming during the diauxic shift and for survival in stationary phase%3B similar to E. coli Hsp31 and S. cerevisiae Hsp31p%2C Hsp33p%2C and Sno4p%3B member of the DJ-1/ThiJ/Pf	XVI	11887	12600	+	855849
5099	YML047C	67.9782	-2.79753	0.967191	0.000348445	0.00264265	PRM6	Potassium transporter that mediates K+ influx%3B activates high-affinity Ca2+ influx system (HACS) during mating pheromone response%3B expression up-regulated in response to alpha factor%3B regulated by Ste12p during mating%3B localized to sites of polar	XIII	180017	181075	-	854959
3072	YGR236C	10757	-2.75526	0.37287	8.30682e-15	9.59365e-13	SPG1	Protein required for high temperature survival during stationary phase%3B not required for growth on nonfermentable carbon sources%3B the authentic%2C non-tagged protein is detected in highly purified mitochondria in high-throughput studies [Source:SGD%3	VII	962530	962817	-	853151
4563	YLR031W	508.155	-2.74845	0.343981	7.72296e-17	1.18233e-14	NA	Putative protein of unknown function%3B S288C contains an in-frame stop codon between ORFs YLR030W and YLR031W%3B YLR031W has a paralog%2C YMR124W%2C that arose from the whole genome duplication [Source:SGD%3BAcc:S000004021]	XII	204225	204785	+	850718
331	tN(GUU)P	44.0031	-2.74623	0.893424	9.61757e-05	0.000900604	NA	NA	NA	NA	NA	NA	856259
2851	YGR032W	13502	-2.74443	0.238549	7.63858e-32	5.02848e-29	GSC2	Catalytic subunit of 1%2C3-beta-glucan synthase%3B involved in formation of the inner layer of the spore wall%3B activity positively regulated by Rho1p and negatively by Smk1p%3B GSC2 has a paralog%2C FKS1%2C that arose from the whole genome duplication	VII	548264	553951	+	852920
1117	YCR010C	11015.9	-2.72466	1.45939	0.00167871	0.00979693	ADY2	Acetate transporter required for normal sporulation%3B phosphorylated in mitochondria%3B ADY2 has a paralog%2C ATO2%2C that arose from the whole genome duplication [Source:SGD%3BAcc:S000000603]	III	132273	133124	-	850368
3750	YJL045W	3173.77	-2.72067	0.319815	1.05838e-18	2.04921e-16	YJL045W	Minor succinate dehydrogenase isozyme%3B participates in oxidation of succinate and transfer of electrons to ubiquinone%3B induced during the diauxic shift in a Cat8p-dependent manner%3B YJL045W has a paralog%2C SDH1%2C that arose from the whole genome d	X	356024	357928	+	853405
4544	YLR012C	43.5652	-2.71715	0.785034	2.58306e-05	0.000293177	NA	Putative protein of unknown function%3B YLR012C is not an essential gene [Source:SGD%3BAcc:S000004002]	XII	169982	170281	-	850699
6766	YPL156C	5788.16	-2.70615	0.440819	4.74721e-11	2.69404e-09	PRM4	Pheromone-regulated protein proposed to be involved in mating%3B predicted to have 1 transmembrane segment%3B transcriptionally regulated by Ste12p during mating and by Cat8p during the diauxic shift [Source:SGD%3BAcc:S000006077]	XVI	255913	256767	-	855947
1026	YBR296C-A	100.485	-2.70296	0.584648	2.36754e-07	5.14374e-06	NA	Putative protein of unknown function%3B identified by gene-trapping%2C microarray-based expression analysis%2C and genome-wide homology searching [Source:SGD%3BAcc:S000028605]	II	800123	800242	-	1466451
5262	YMR058W	23292.9	-2.70228	0.236582	2.02531e-31	1.11105e-28	FET3	Ferro-O2-oxidoreductase%3B multicopper oxidase that oxidizes ferrous (Fe2+) to ferric iron (Fe3+) for subsequent cellular uptake by transmembrane permease Ftr1p%3B required for high-affinity iron uptake and involved in mediating resistance to copper ion	XIII	388822	390732	+	855080
5391	YMR175W	23438.5	-2.68803	0.612381	5.64231e-07	1.09892e-05	SIP18	Phospholipid-binding hydrophilin%3B essential to overcome desiccation-rehydration process%3B expression is induced by osmotic stress%3B SIP18 has a paralog%2C GRE1%2C that arose from the whole genome duplication [Source:SGD%3BAcc:S000004787]	XIII	611016	611255	+	855213
2151	YEL065W	9561.16	-2.66805	0.379641	1.23952e-13	1.18257e-11	SIT1	Ferrioxamine B transporter%3B member of the ARN family of transporters that specifically recognize siderophore-iron chelates%3B transcription is induced during iron deprivation and diauxic shift%3B potentially phosphorylated by Cdc28p [Source:SGD%3BAcc:S	V	27657	29543	+	856644
2910	YGR087C	559.532	-2.61265	0.267084	7.09189e-24	2.33429e-21	PDC6	Minor isoform of pyruvate decarboxylase%3B decarboxylates pyruvate to acetaldehyde%2C involved in amino acid catabolism%3B transcription is glucose- and ethanol-dependent%2C and is strongly induced during sulfur limitation [Source:SGD%3BAcc:S000003319]	VII	651290	652981	-	852978
308	tL(UAG)L1	51.4316	-2.57808	0.754508	2.97957e-05	0.000334719	NA	NA	NA	NA	NA	NA	850925
6985	YPR078C	173.615	-2.57612	0.327532	2.39154e-16	3.2799e-14	NA	Putative protein of unknown function%3B possible role in DNA metabolism and/or in genome stability%3B expression is heat-inducible [Source:SGD%3BAcc:S000006282]	XVI	697147	698265	-	856193
6899	YPL282C	38.1535	-2.5725	1.10312	0.00297563	0.0155634	PAU22	Protein of unknown function%3B member of the seripauperin multigene family encoded mainly in subtelomeric regions%3B SWAT-GFP fusion protein localizes to the endoplasmic reticulum and vacuole%2C while mCherry fusion localizes to just the vacuole%3B ident	XVI	7933	8427	-	855847
5454	YMR232W	629.579	-2.56664	0.360129	6.04692e-14	6.12413e-12	FUS2	Cell fusion regulator%3B cytoplasmic protein localized to shmoo tip%3B required for alignment of parental nuclei before nuclear fusion during mating%3B contains a Dbl-homology domain%3B binds specifically with activated Cdc42p [Source:SGD%3BAcc:S00000484	XIII	736926	738959	+	855272
4706	YLR157W-D	39.7036	-2.56352	0.475245	4.83939e-09	1.56165e-07	YLR157W-D	Putative protein of unknown function%3B identified by gene-trapping%2C microarray-based expression analysis%2C and genome-wide homology searching%3B YLR157W-D has a paralog%2C YLR161W%2C that arose from a segmental duplication [Source:SGD%3BAcc:S00002867	XII	475764	475976	+	1466412
3036	YGR201C	8322.68	-2.54	0.212018	2.8775e-34	2.36782e-31	NA	Putative protein of unknown function [Source:SGD%3BAcc:S000003433]	VII	902520	903197	-	853115
3142	YHL005C	9.40763	-2.50052	1.21447	0.00200868	0.0112823	NA	Putative protein of unknown function%3B conserved among S. cerevisiae strains%3B YHL005C is not an essential gene [Source:SGD%3BAcc:S000000997]	VIII	98828	99220	-	856385
4562	YLR030W	766.166	-2.49951	0.229881	1.03242e-28	4.24778e-26	NA	Putative protein of unknown function%3B S288C contains an in-frame stop codon between ORFs YLR030W and YLR031W [Source:SGD%3BAcc:S000004020]	XII	203290	204081	+	850717
5144	YML087C	4901.6	-2.48596	0.315752	2.11463e-16	2.96183e-14	AIM33	Protein of unknown function%2C highly conserved across species%3B homolog of human CYB5R4%3B null mutant displays reduced frequency of mitochondrial genome loss%3B AIM33 has a paralog%2C PGA3%2C that arose from the whole genome duplication [Source:SGD%3B	XIII	94431	95369	-	854887
6798	YPL187W	96617.2	-2.48541	0.462955	4.61704e-09	1.49724e-07	MF(ALPHA)1	Mating pheromone alpha-factor%2C made by alpha cells%3B interacts with mating type a cells to induce cell cycle arrest and other responses leading to mating%3B also encoded by MF(ALPHA)2%2C although MF(ALPHA)1 produces most alpha-factor%3B binds copper(I	XVI	193648	194145	+	855914
3798	YJL088W	1141.9	-2.46335	1.36246	NA	NA	ARG3	Ornithine carbamoyltransferase%3B also known as carbamoylphosphate:L-ornithine carbamoyltransferase%3B catalyzes the biosynthesis of the arginine precursor citrulline [Source:SGD%3BAcc:S000003624]	X	268799	269815	+	853357
2343	YER145C	12709.9	-2.45815	0.335091	1.37518e-14	1.53437e-12	FTR1	High affinity iron permease%3B involved in the transport of iron across the plasma membrane%3B forms complex with Fet3p%3B expression is regulated by iron%3B protein abundance increases in response to DNA replication stress [Source:SGD%3BAcc:S000000947]	V	460526	461740	-	856888
1760	YDR256C	5578.81	-2.45775	0.586893	1.49308e-06	2.52672e-05	CTA1	Catalase A%3B breaks down hydrogen peroxide in the peroxisomal matrix formed by acyl-CoA oxidase (Pox1p) during fatty acid beta-oxidation [Source:SGD%3BAcc:S000002664]	IV	968133	969680	-	851843
7114	YPR193C	369.084	-2.45761	0.336804	1.86726e-14	2.0487e-12	HPA2	Tetrameric histone acetyltransferase%3B has similarity to Gcn5p%2C Hat1p%2C Elp3p%2C and Hpa3p%3B acetylates histones H3 and H4 in vitro and exhibits autoacetylation activity%3B also acetylates polyamines [Source:SGD%3BAcc:S000006397]	XVI	922909	923379	-	856323
2290	YER096W	2602.91	-2.45291	0.21713	8.62266e-31	3.7842e-28	SHC1	Sporulation-specific activator of Chs3p (chitin synthase III)%3B required for the synthesis of the chitosan layer of ascospores%3B transcriptionally induced at alkaline pH%3B SHC1 has a paralog%2C SKT5%2C that arose from the whole genome duplication [Sou	V	351698	353236	+	856832
4145	YKL031W	106.86	-2.43473	0.515786	1.26357e-07	2.97073e-06	NA	Dubious open reading frame%3B unlikely to encode a functional protein%2C based on available experimental and comparative sequence data%3B not conserved in closely related Saccharomyces species [Source:SGD%3BAcc:S000001514]	XI	382072	382485	+	NA
292	tL(CAA)G2	8.33867	-2.3999	2.60334	0.00706642	0.0305755	NA	NA	NA	NA	NA	NA	852843
5851	YNL277W-A	70.4192	-2.38448	0.547241	7.68444e-07	1.43712e-05	NA	Putative protein of unknown function [Source:SGD%3BAcc:S000028852]	XIV	116679	116867	+	1466509
3272	YHR061C	1318.28	-2.37708	0.196545	7.50555e-35	7.05844e-32	GIC1	Protein involved in initiation of budding and cellular polarization%3B interacts with Cdc42p via the Cdc42/Rac-interactive binding (CRIB) domain%3B relocalizes from bud neck to nucleus upon DNA replication stress%3B GIC1 has a paralog%2C GIC2%2C that aro	VIII	221534	222478	-	856458
4712	YLR161W	351.891	-2.37381	0.248157	5.2462e-23	1.43899e-20	NA	Putative protein of unknown function%3B YLR156W%2C YLR159W%2C and YLR161W are three identical open reading frames in S288C encoded near the ribosomal DNA region of chromosome 12%3B YLR161W has a paralog%2C YLR157W-D%2C that arose from a segmental duplica	XII	488997	489341	+	850858
6864	YPL250C	1401.46	-2.36745	0.444034	5.71935e-09	1.79288e-07	ATG41	Protein of unknown function%3B required for selective and nonselective autophagy%2C and mitophagy%3B regulates the rate of autophagosome formation%3B interacts with Atg9p%2C and has a similar peri-mitochondrial localization%3B elevated Gcn4p-dependent ex	XVI	74309	74719	-	855825
6909	YPR006C	3622.29	-2.35128	0.304699	7.51596e-16	9.70149e-14	ICL2	2-methylisocitrate lyase of the mitochondrial matrix%3B functions in the methylcitrate cycle to catalyze the conversion of 2-methylisocitrate to succinate and pyruvate%3B ICL2 transcription is repressed by glucose and induced by ethanol [Source:SGD%3BAcc	XVI	567269	568996	-	856114
416	tV(AAC)E2	23.4496	-2.33747	0.94094	0.000619034	0.00430317	NA	NA	NA	NA	NA	NA	856894
2251	YER069W	3778.98	-2.33434	0.337068	2.7362e-13	2.33928e-11	ARG5%2C6	Acetylglutamate kinase and N-acetyl-gamma-glutamyl-phosphate reductase%3B N-acetyl-L-glutamate kinase (NAGK) catalyzes the 2nd and N-acetyl-gamma-glutamyl-phosphate reductase (NAGSA)%2C the 3rd step in arginine biosynthesis%3B synthesized as a precursor	V	295410	298001	+	856800
2814	YGL261C	85.698	-2.31225	0.715547	6.09056e-05	0.00061306	PAU11	Putative protein of unknown function%3B member of the seripauperin multigene family encoded mainly in subtelomeric regions%3B mRNA expression appears to be regulated by SUT1 and UPC2 [Source:SGD%3BAcc:S000003230]	VII	6290	6652	-	852630
3524	YIL054W	44.1082	-2.29799	0.706673	6.43449e-05	0.000640821	NA	Protein of unknown function%3B expressed at both mRNA and protein levels [Source:SGD%3BAcc:S000001316]	IX	254543	254860	+	854757
189	tD(GUC)N	54.7692	-2.29633	0.705979	5.8232e-05	0.00058885	NA	NA	NA	NA	NA	NA	855670
2830	YGR014W	6558.62	-2.27672	0.386723	2.46196e-10	1.14134e-08	MSB2	Mucin family member involved in various signaling pathways%3B functions as osmosensor in the Sho1p-mediated HOG pathway%3B functions in Cdc42p- and MAP kinase-dependent filamentous growth signaling pathway%3B processed into secreted and cell-associated f	VII	516943	520863	+	852897
3595	YIL119C	2242.56	-2.27126	0.311737	2.06779e-14	2.23152e-12	RPI1	Transcription factor%2C allelic differences between S288C and Sigma1278b%3B mediates fermentation stress tolerance by modulating cell wall integrity%3B overexpression suppresses heat shock sensitivity of wild-type RAS2 overexpression and also suppresses	IX	136654	137877	-	854687
531	YAL067C	475.546	-2.2296	0.270783	1.21948e-17	2.16969e-15	SEO1	Putative permease%3B member of the allantoate transporter subfamily of the major facilitator superfamily%3B mutation confers resistance to ethionine sulfoxide [Source:SGD%3BAcc:S000000062]	I	7235	9016	-	851230
5965	YNR044W	7666.32	-2.2129	0.611274	1.57577e-05	0.000193531	AGA1	Anchorage subunit of a-agglutinin of a-cells%3B highly O-glycosylated protein with N-terminal secretion signal and C-terminal signal for addition of GPI anchor to cell wall%2C linked to adhesion subunit Aga2p via two disulfide bonds%3B AGA1 has a paralog	XIV	703699	705876	+	855780
6546	YOR343C	270.761	-2.20891	0.451881	6.15129e-08	1.55746e-06	NA	Putative protein of unknown function%3B conserved across S. cerevisiae strains [Source:SGD%3BAcc:S000005870]	XV	968148	968474	-	854521
2813	YGL260W	52.9319	-2.19817	0.915709	0.000758333	0.00507328	NA	Putative protein of unknown function%3B transcription is significantly increased in a NAP1 deletion background%3B deletion mutant has increased accumulation of nickel and selenium [Source:SGD%3BAcc:S000003229]	VII	6860	7090	+	852631
3872	YJL157C	6463.63	-2.18949	0.267492	1.87267e-17	3.24416e-15	FAR1	CDK inhibitor and nuclear anchor%3B during the cell cycle Far1p sequesters the GEF Cdc24p in the nucleus%3B phosphorylation by Cdc28p-Cln results in SCFCdc4 complex-mediated ubiquitin-dependent degradation%2C releasing Cdc24p for export and activation of	X	123836	126328	-	853283
5775	YNL202W	586.197	-2.13779	0.400429	5.79883e-09	1.80918e-07	SPS19	Peroxisomal 2%2C4-dienoyl-CoA reductase%3B auxiliary enzyme of fatty acid beta-oxidation%3B homodimeric enzyme required for growth and sporulation on petroselineate medium%3B expression induced during late sporulation and in the presence of oleate [Sourc	XIV	259578	260456	+	855518
5474	YMR251W	521.776	-2.13501	0.36903	4.56745e-10	1.91838e-08	GTO3	Omega class glutathione transferase%3B putative cytosolic localization [Source:SGD%3BAcc:S000004863]	XIII	772915	774015	+	855292
5390	YMR174C	11347.4	-2.13486	0.266092	6.75612e-17	1.05894e-14	PAI3	Cytoplasmic proteinase A (Pep4p) inhibitor%3B dependent on Pbs2p and Hog1p protein kinases for osmotic induction%3B intrinsically unstructured%2C N-terminal half becomes ordered in the active site of proteinase A upon contact [Source:SGD%3BAcc:S000004786	XIII	610159	610365	-	855212
4671	YLR136C	1082.77	-2.13439	0.320715	1.83467e-12	1.35704e-10	TIS11	mRNA-binding protein expressed during iron starvation%3B binds to a sequence element in the 3'-untranslated regions of specific mRNAs to mediate their degradation%3B involved in iron homeostasis%3B protein increases in abundance and relative distribution	XII	415801	416658	-	850827
6667	YPL061W	40427.7	-2.10593	1.35608	0.00336181	0.0171957	ALD6	Cytosolic aldehyde dehydrogenase%3B activated by Mg2+ and utilizes NADP+ as the preferred coenzyme%3B required for conversion of acetaldehyde to acetate%3B constitutively expressed%3B locates to the mitochondrial outer surface upon oxidative stress [Sour	XVI	432588	434090	+	856044
4936	YLR366W	42.4954	-2.08265	0.655978	7.81869e-05	0.000760272	NA	Dubious open reading frame%3B unlikely to encode a functional protein%2C based on available experimental and comparative sequence data%3B partially overlaps the dubious ORF YLR364C-A [Source:SGD%3BAcc:S000004358]	XII	855538	855843	+	NA
773	YBR067C	24571.8	-2.0707	0.707083	0.000169495	0.00143787	TIP1	Major cell wall mannoprotein with possible lipase activity%3B transcription is induced by heat- and cold-shock%3B member of the Srp1p/Tip1p family of serine-alanine-rich proteins [Source:SGD%3BAcc:S000000271]	II	372103	372735	-	852359
4100	YJR151W-A	10.1778	-2.04895	1.18394	0.00373829	0.0187284	NA	Putative protein of unknown function%3B identified by fungal homology and RT-PCR%3B predicted to have a role in transcription based on computational	X	717580	717630	+	1466471
7113	YPR192W	1798.15	-2.04601	0.36392	1.22451e-09	4.52863e-08	AQY1	Spore-specific water channel%3B mediates the transport of water across cell membranes%2C developmentally controlled%3B may play a role in spore maturation%2C probably by allowing water outflow%2C may be involved in freeze tolerance [Source:SGD%3BAcc:S000	XVI	921860	922777	+	856322
2756	YGL205W	1695.51	-2.04258	0.3807	5.17864e-09	1.64691e-07	POX1	Fatty-acyl coenzyme A oxidase%3B involved in the fatty acid beta-oxidation pathway%3B localized to the peroxisomal matrix [Source:SGD%3BAcc:S000003173]	VII	108158	110404	+	852667
6891	YPL274W	6111.62	-2.04207	0.573699	2.07058e-05	0.000241677	SAM3	High-affinity S-adenosylmethionine permease%3B required for utilization of S-adenosylmethionine as a sulfur source%3B has similarity to S-methylmethionine permease Mmp1p [Source:SGD%3BAcc:S000006195]	XVI	22938	24701	+	855854
4359	YKR009C	6924.62	-2.01815	0.192046	5.6649e-27	2.07178e-24	FOX2	3-hydroxyacyl-CoA dehydrogenase and enoyl-CoA hydratase%3B multifunctional enzyme of the peroxisomal fatty acid beta-oxidation pathway%3B mutation is functionally complemented by human HSD17B4 [Source:SGD%3BAcc:S000001717]	XI	454352	457054	-	853878
4363	YKR013W	4992.52	-2.01395	0.400578	3.21562e-08	8.60506e-07	PRY2	Sterol binding protein involved in the export of acetylated sterols%3B secreted glycoprotein and member of the CAP protein superfamily (cysteine-rich secretory proteins (CRISP)%2C antigen 5%2C and pathogenesis related 1 proteins)%3B sterol export functio	XI	463959	464948	+	853882
4390	YKR039W	2396.24	-2.01203	0.270885	7.69581e-15	9.0467e-13	GAP1	General amino acid permease%3B Gap1p senses the presence of amino acid substrates to regulate localization to the plasma membrane when needed%3B essential for invasive growth [Source:SGD%3BAcc:S000001747]	XI	515063	516871	+	853912
4717	YLR164W	2856.36	-1.99559	0.202598	4.98954e-24	1.72874e-21	SHH4	Putative alternate subunit of succinate dehydrogenase (SDH)%3B mitochondrial inner membrane protein%3B genetic interaction with SDH4 suggests that Shh4p can function as a functional SDH subunit%3B a fraction copurifies with SDH subunit Sdh3p%3B expressio	XII	493883	494389	+	850861
3362	YHR139C	1365.41	-1.98998	0.21004	2.01361e-22	5.09831e-20	SPS100	Protein required for spore wall maturation%3B expressed during sporulation%3B may be a component of the spore wall%3B expression also induced in cells treated with the mycotoxin patulin%3B SPS100 has a paralog%2C YGP1%2C that arose from the whole genome	VIII	378219	379199	-	856541
2491	YFR012W	76.197	-1.98892	0.568101	2.68342e-05	0.000303001	DCV1	Protein of unknown function%3B deletion mutant shows strong genetic interaction with cdc28-as1 mutant in the presence of 1-NM-PP1%3B DCV1 has a paralog%2C YOL019W%2C that arose from the whole genome duplication [Source:SGD%3BAcc:S000001908]	VI	167888	168496	+	850565
1900	YDR380W	4249.28	-1.97466	0.551949	1.98746e-05	0.000233217	ARO10	Phenylpyruvate decarboxylase%3B catalyzes decarboxylation of phenylpyruvate to phenylacetaldehyde%2C which is the first specific step in the Ehrlich pathway%3B involved in protein N-terminal Met and Ala catabolism [Source:SGD%3BAcc:S000002788]	IV	1234218	1236125	+	851987
6598	YOR391C	1334.49	-1.96759	0.323703	1.18216e-10	6.03269e-09	HSP33	Possible chaperone and cysteine protease%3B required for transcriptional reprogramming during the diauxic shift and for survival in stationary phase%3B similar to E. coli Hsp31 and S. cerevisiae Hsp31p%2C Hsp32p%2C and Sno4p%3B member of the DJ-1/ThiJ/Pf	XV	1078545	1079258	-	854573
2468	YFL059W	1244.31	-1.96595	0.286908	5.08859e-13	4.03592e-11	SNZ3	Member of a stationary phase-induced gene family%3B expressed in the presence of galactose%3B transcription of SNZ3 is induced prior to diauxic shift%2C and also in the absence of thiamin in a Thi2p-dependent manner%3B forms a coregulated gene pair with	VI	11363	12259	+	850485
6173	YOL162W	128.02	-1.96482	0.328511	1.55859e-10	7.60013e-09	NA	Putative protein of unknown function%3B member of the Dal5p subfamily of the major facilitator family [Source:SGD%3BAcc:S000005522]	XV	10119	10766	+	854002
4710	YLR159W	199.7	-1.9633	0.2414	3.23793e-17	5.32882e-15	NA	Putative protein of unknown function%3B YLR156W%2C YLR159W%2C and YLR161W are three identical open reading frames in S288C encoded near the ribosomal DNA region of chromosome 12%3B YLR159W has a paralog%2C YLR156W%2C that arose from a segmental duplicati	XII	485345	485689	+	850856
5920	YNR002C	4171.13	-1.95946	0.282299	2.71035e-13	2.33928e-11	ATO2	Putative transmembrane protein involved in export of ammonia%3B ammonia is a starvation signal that promotes cell death in aging colonies%3B phosphorylated in mitochondria%3B member of the TC 9.B.33 YaaH family%3B homolog of Y. lipolytica Gpr1p%3B ATO2 h	XIV	633008	633856	-	855736
2230	YER053C-A	4553.72	-1.94022	0.399079	7.60971e-08	1.87621e-06	NA	Protein of unknown function%3B green fluorescent protein (GFP)-fusion protein localizes to the endoplasmic reticulum%3B protein abundance increases in response to DNA replication stress [Source:SGD%3BAcc:S000007523]	V	260933	261046	-	856780
3633	YIL155C	17191.2	-1.94	0.164328	2.70596e-33	1.97926e-30	GUT2	Mitochondrial glycerol-3-phosphate dehydrogenase%3B expression is repressed by both glucose and cAMP and derepressed by non-fermentable carbon sources in a Snf1p%2C Rsf1p%2C Hap2/3/4/5 complex dependent manner [Source:SGD%3BAcc:S000001417]	IX	51759	53708	-	854651
3694	YIR030W-A	19.2433	-1.93433	0.710746	0.000351678	0.00266346	NA	Dubious open reading frame%3B unlikely to encode a functional protein%2C based on available experimental and comparative sequence data%3B overlaps ORF DAL7/YIR031C [Source:SGD%3BAcc:S000028802]	IX	412899	413282	+	NA
2552	YGL007W	159.987	-1.91815	0.466181	2.43784e-06	3.87639e-05	BRP1	Putative protein of unknown function%3B conserved among S. cerevisiae strains%3B located in the upstream region of PMA1%3B deletion leads to polyamine resistance due to downregulation of PMA1 [Source:SGD%3BAcc:S000002975]	VII	483260	483637	+	852877
67	RUF23	43.9865	-1.89627	0.62556	0.00014704	0.00128719	NA	NA	NA	NA	NA	NA	9164890
6369	YOR177C	451.187	-1.89564	0.200375	2.28301e-22	5.56631e-20	MPC54	Component of the meiotic outer plaque%3B a membrane-organizing center which is assembled on the cytoplasmic face of the spindle pole body during meiosis II and triggers the formation of the prospore membrane%3B potential Cdc28p substrate [Source:SGD%3BAc	XV	665785	667179	-	854349
2145	YEL059W	109.398	-1.87154	0.689661	0.00033696	0.00257632	HHY1	Dubious open reading frame unlikely to encode a functional protein%3B mutant is hypersensitive to hygromycin B indicative of defects in vacuolar trafficking [Source:SGD%3BAcc:S000000785]	V	42652	42960	+	NA
6553	YOR348C	8733.36	-1.86485	2.10605	0.00622008	0.0278199	PUT4	Proline permease%3B required for high-affinity transport of proline%3B also transports the toxic proline analog azetidine-2-carboxylate (AzC)%3B PUT4 transcription is repressed in ammonia-grown cells [Source:SGD%3BAcc:S000005875]	XV	986899	988782	-	854530
559	YAR047C	132.14	-1.85991	0.561619	5.37179e-05	0.000550818	NA	Dubious open reading frame%3B unlikely to encode a functional protein%2C based on available experimental and comparative sequence data [Source:SGD%3BAcc:S000000083]	I	201467	201787	-	NA
5217	YMR017W	244.082	-1.85402	0.313443	2.82485e-10	1.29139e-08	SPO20	Meiosis-specific subunit of the t-SNARE complex%3B required for prospore membrane formation during sporulation%3B similar to but not functionally redundant with Sec9p%3B binds to phosphatidic acid%3B SNAP-25 homolog [Source:SGD%3BAcc:S000004619]	XIII	307489	308682	+	855031
4104	YJR155W	4733.47	-1.85394	0.226636	2.12053e-17	3.57934e-15	AAD10	Putative aryl-alcohol dehydrogenase%3B similar to P. chrysosporium aryl-alcohol dehydrogenase%3B mutational analysis has not yet revealed a physiological role%3B members of the AAD gene family comprise three pairs (AAD3 + AAD15%2C AAD6/AAD16 + AAD4%2C AA	X	727405	728271	+	853620
6942	YPR036W-A	103005	-1.85144	0.671315	0.00030162	0.00234978	SPO24	Small (67 amino acids) protein involved in sporulation%3B localizes to the prospore membrane%3B phosphorylated during meiosis%3B a longer%2C 5'-extended mRNA is also transcribed beginning in mid-meiosis%2C regulated by two MSEs (middle sporulation elemen	XVI	645950	646153	+	856149
6659	YPL054W	4071.36	-1.83804	0.43079	1.27807e-06	2.23763e-05	LEE1	Zinc-finger protein of unknown function [Source:SGD%3BAcc:S000005975]	XVI	455759	456664	+	856053
6742	YPL134C	12026.7	-1.83515	0.170239	3.31314e-28	1.28296e-25	ODC1	Mitochondrial inner membrane transporter%3B 2-oxodicarboxylate transporter%2C exports 2-oxoadipate and 2-oxoglutarate from the mitochondrial matrix to the cytosol for lysine and glutamate biosynthesis and lysine catabolism%3B suppresses%2C in multicopy%2	XVI	298571	299503	-	855969
6089	YOL084W	3369.27	-1.8274	0.309366	2.46094e-10	1.14134e-08	PHM7	Protein of unknown function%3B expression is regulated by phosphate levels%3B green fluorescent protein (GFP)-fusion protein localizes to the cell periphery and vacuole%3B protein abundance increases in response to DNA replication stress [Source:SGD%3BAc	XV	162356	165331	+	854070
2644	YGL096W	2062.04	-1.81087	0.159981	8.23762e-31	3.7842e-28	TOS8	Homeodomain-containing protein and putative transcription factor%3B found associated with chromatin%3B target of SBF transcription factor%3B induced during meiosis and under cell-damaging conditions%3B TOS8 has a paralog%2C CUP9%2C that arose from the wh	VII	325331	326161	+	852783
6940	YPR035W	33763.8	-1.80897	0.634019	0.000237103	0.0019128	GLN1	Glutamine synthetase (GS)%3B synthesizes glutamine from glutamate and ammonia%3B with Glt1p%2C forms the secondary pathway for glutamate biosynthesis from ammonia%3B expression regulated by nitrogen source and by amino acid limitation%3B forms filaments	XVI	642208	643320	+	856147
5909	YNL333W	1210.9	-1.79657	0.258086	2.5562e-13	2.24366e-11	SNZ2	Member of a stationary phase-induced gene family%3B transcription of SNZ2 is induced prior to diauxic shift%2C and also in the absence of thiamin in a Thi2p-dependent manner%3B forms a coregulated gene pair with SNO2%3B interacts with Thi11p [Source:SGD%	XIV	13267	14163	+	855383
2065	YDR537C	33.3574	-1.76621	0.619208	0.000236977	0.0019128	NA	Dubious open reading frame%3B unlikely to encode a functional protein%2C based on available experimental and comparative sequence data%3B almost completely overlaps verified ORF PAD1/YDR538W [Source:SGD%3BAcc:S000002945]	IV	1510856	1511461	-	NA
753	YBR050C	6279.78	-1.76026	1.04626	0.00326076	0.0167831	REG2	Regulatory subunit of the Glc7p type-1 protein phosphatase%3B involved with Reg1p%2C Glc7p%2C and Snf1p in regulation of glucose-repressible genes%2C also involved in glucose-induced proteolysis of maltose permease%3B REG2 has a paralog%2C REG1%2C that a	II	337183	338199	-	852340
6599	YOR392W	55.9314	-1.75709	0.749811	0.00101484	0.00649873	NA	Dubious open reading frame%3B unlikely to encode a functional protein%2C based on available experimental and comparative sequence data%3B gene expression induced by heat [Source:SGD%3BAcc:S000005919]	XV	1079282	1079725	+	NA
6150	YOL140W	2549.06	-1.75298	0.308135	9.51693e-10	3.66374e-08	ARG8	Acetylornithine aminotransferase%3B catalyzes the fourth step in the biosynthesis of the arginine precursor ornithine [Source:SGD%3BAcc:S000005500]	XV	58759	60030	+	854025
1448	YDL215C	26426	-1.73552	0.31809	3.6046e-09	1.20452e-07	GDH2	NAD(+)-dependent glutamate dehydrogenase%3B degrades glutamate to ammonia and alpha-ketoglutarate%3B expression sensitive to nitrogen catabolite repression and intracellular ammonia levels%3B genetically interacts with GDH3 by suppressing stress-induced	IV	70640	73918	-	851311
4875	YLR311C	262.489	-1.7241	0.43521	5.09104e-06	7.25418e-05	NA	Dubious open reading frame%3B unlikely to encode a functional protein%2C based on available experimental and comparative sequence data [Source:SGD%3BAcc:S000004302]	XII	757265	757612	-	NA
1310	YDL085W	9742.71	-1.72408	0.272617	1.93068e-11	1.21044e-09	NDE2	Mitochondrial external NADH dehydrogenase%3B catalyzes the oxidation of cytosolic NADH%3B Nde1p and Nde2p are involved in providing the cytosolic NADH to the mitochondrial respiratory chain%3B NDE2 has a paralog%2C NDE1%2C that arose from the whole genom	IV	303211	304848	+	851474
1973	YDR451C	1865.63	-1.72063	0.355083	9.19544e-08	2.22019e-06	YHP1	Homeobox transcriptional repressor%3B binds Mcm1p and early cell cycle box (ECB) elements of cell cycle regulated genes%2C thereby restricting ECB-mediated transcription to the M/G1 interval%3B YHP1 has a paralog%2C YOX1%2C that arose from the whole geno	IV	1361120	1362181	-	852062
6128	YOL118C	423.241	-1.71342	0.310651	2.58136e-09	9.03889e-08	NA	Putative protein of unknown function%3B conserved across S. cerevisiae strains [Source:SGD%3BAcc:S000005478]	XV	96608	96916	-	854031
327	tN(GUU)N1	37.2977	-1.70668	0.904427	0.00254082	0.0137551	NA	NA	NA	NA	NA	NA	855435
2426	YFL019C	511.633	-1.70066	0.378486	5.46845e-07	1.07459e-05	NA	Putative protein of unknown function%3B conserved across S. cerevisiae strains%3B YFL019C is not an essential gene [Source:SGD%3BAcc:S000001875]	VI	100252	100605	-	850525
620	YBL042C	3349.64	-1.69798	0.612223	0.000317103	0.00244436	FUI1	High affinity uridine permease%2C localizes to the plasma membrane%3B also mediates low but significant transport of the cytotoxic nucleoside analog 5-fluorouridine%3B not involved in uracil transport%3B relative distribution to the vacuole increases upo	II	138341	140260	-	852238
6014	YOL013W-B	18.623	-1.67311	1.19658	0.00547978	0.0252792	YOL013W-B	Dubious open reading frame%3B unlikely to encode a functional protein%2C based on available experimental and comparative sequence data%3B completely overlaps the long terminal repeat (LTR) of a Ty1 element [Source:SGD%3BAcc:S000007252]	XV	300690	300980	+	NA
3087	YGR250C	14369.5	-1.6681	0.330273	3.30132e-08	8.72795e-07	RIE1	Putative RNA binding protein%3B localizes to stress granules induced by glucose deprivation%3B interacts with Rbg1p in a two-hybrid assay%3B protein abundance increases in response to DNA replication stress [Source:SGD%3BAcc:S000003482]	VII	991176	993521	-	853165
7062	YPR151C	236.914	-1.65518	0.315994	1.28191e-08	3.734e-07	SUE1	Protein required for degradation of unstable forms of cytochrome c%3B located in the mitochondria [Source:SGD%3BAcc:S000006355]	XVI	831055	831675	-	856274
790	YBR083W	5184.34	-1.65011	0.234128	1.48709e-13	1.37712e-11	TEC1	Transcription factor targeting filamentation genes and Ty1 expression%3B Ste12p activation of most filamentation gene promoters depends on Tec1p and Tec1p transcriptional activity is dependent on its association with Ste12p%3B binds to TCS elements upstr	II	409169	410629	+	852377
3286	YHR071W	4308	-1.63194	0.333822	7.76153e-08	1.9065e-06	PCL5	Cyclin%3B interacts with and phosphorylated by Pho85p cyclin-dependent kinase (Cdk)%2C induced by Gcn4p at level of transcription%2C specifically required for Gcn4p degradation%2C may be sensor of cellular protein biosynthetic capacity [Source:SGD%3BAcc:	VIII	237004	237693	+	856468
7030	YPR123C	748.074	-1.62867	0.464519	3.05076e-05	0.00034155	NA	Dubious open reading frame%3B unlikely to encode a functional protein%2C based on available experimental and comparative sequence data%3B partially/completely overlaps the verified ORF CTR [Source:SGD%3BAcc:S000006327]	XVI	786141	786575	-	NA
4701	YLR156W	97.8341	-1.62757	0.339249	1.34717e-07	3.15603e-06	NA	Putative protein of unknown function%3B exhibits a two-hybrid interaction with Jsn1p in a large-scale analysis%3B YLR156W has a paralog%2C YLR159W%2C that arose from a segmental duplication [Source:SGD%3BAcc:S000004146]	XII	472113	472457	+	850851
560	YAR050W	1706.66	-1.62612	0.326568	4.89863e-08	1.26959e-06	FLO1	Lectin-like protein involved in flocculation%3B cell wall protein that binds mannose chains on the surface of other cells%2C confers floc-forming ability that is chymotrypsin sensitive and heat resistant%3B important for co-flocculation with other yeasts	I	203403	208016	+	851289
4909	YLR343W	1847.69	-1.61158	0.491643	6.95725e-05	0.000684598	GAS2	1%2C3-beta-glucanosyltransferase%3B involved with Gas4p in spore wall assembly%3B has similarity to Gas1p [Source:SGD%3BAcc:S000004335]	XII	816094	817761	+	851056
2313	YER119C-A	17.9374	-1.60534	0.941727	0.00380086	0.0189985	NA	Dubious open reading frame%3B unlikely to encode a functional protein%2C based on available experimental and comparative sequence data%3B not conserved in closely related Saccharomyces species%3B deletion mutation blocks replication of Brome mosaic virus	V	400867	401238	-	NA
4727	YLR174W	31347.4	-1.60411	1.45873	NA	NA	IDP2	Cytosolic NADP-specific isocitrate dehydrogenase%3B catalyzes oxidation of isocitrate to alpha-ketoglutarate%3B levels are elevated during growth on non-fermentable carbon sources and reduced during growth on glucose%3B IDP2 has a paralog%2C IDP3%2C that	XII	504591	505829	+	850871
6581	YOR376W	94.3915	-1.59415	0.756771	0.00175266	0.0101654	NA	Putative protein of unknown function%3B conserved among S. cerevisiae strains%3B YOR376W is not an essential gene [Source:SGD%3BAcc:S000005903]	XV	1043191	1043559	+	854558
3191	YHL046W-A	151.689	-1.59065	0.421616	1.15205e-05	0.000150177	NA	Dubious open reading frame%3B unlikely to encode a functional protein%2C based on available experimental and comparative sequence data%3B overlaps ORF ARN2/YHL047C [Source:SGD%3BAcc:S000028775]	VIII	9981	10307	+	NA
3214	YHR014W	130.322	-1.58934	0.384811	2.66656e-06	4.14008e-05	SPO13	Meiotic regulator%3B involved in maintaining sister chromatid cohesion during meiosis I as well as promoting proper attachment of kinetochores to the spindle during meiosis I and meiosis II%3B anaphase-promoting complex (APC) substrate that is degraded d	VIII	132047	132922	+	856405
4758	YLR205C	713.886	-1.5842	0.199329	1.66966e-16	2.49804e-14	HMX1	ER localized heme oxygenase%3B involved in heme degradation during iron starvation and in the oxidative stress response%3B expression is regulated by AFT1 and oxidative stress%3B relocates to the perinuclear region in the presence of oxidants [Source:SGD	XII	552724	553677	-	850902
2389	YER181C	15.6927	-1.58174	1.86513	0.00924827	0.0377208	NA	Mitochondrial protein of unknown function%3B conserved among S. cerevisiae strains%3B extensively overlaps a Ty1 LTR%3B YER181C is not an essential gene [Source:SGD%3BAcc:S000000983]	V	551473	551796	-	856930
570	YAR073W	120.535	-1.57711	1.3877	0.00748471	0.0319532	IMD1	Nonfunctional protein with homology to IMP dehydrogenase%3B blocked reading frame%2C located close to the telomere%3B not expressed at detectable levels%3B YAR073W and YAR075W comprise a continuous reading frame in most strains of S. cerevisiae%3B YAR073	I	227742	228953	+	NA
6166	YOL156W	776.207	-1.57101	0.226875	3.75479e-13	3.16894e-11	HXT11	Hexose transporter%3B capable of transporting a broad range of substrates including: glucose%2C fructose%2C mannose and galactose%3B polyol transporter that supports the growth on and uptake of xylitol with low affinity when overexpressed in a strain del	XV	25273	26976	+	854009
793	YBR085C-A	15959.6	-1.56149	0.249657	3.34921e-11	2.00435e-09	NA	Protein of unknown function%3B green fluorescent protein (GFP)-fusion protein localizes to the cytoplasm and to the nucleus%3B protein abundance increases in response to DNA replication stress [Source:SGD%3BAcc:S000007522]	II	418907	419164	-	852381
776	YBR070C	1191.91	-1.54598	0.325599	1.65441e-07	3.76851e-06	ALG14	Component of UDP-GlcNAc transferase%3B required for second step of dolichyl-linked oligosaccharide synthesis%3B anchors catalytic subunit Alg13p to ER membrane%3B similar to bacterial and human glycosyltransferases%3B both human homologs ALG13 and ALG14	II	379221	379934	-	852362
1406	YDL174C	34738.7	-1.5228	0.57349	0.000492473	0.00355088	DLD1	Major mitochondrial D-lactate dehydrogenase%3B oxidizes D-lactate to pyruvate%2C transcription is heme-dependent%2C repressed by glucose%2C and derepressed in ethanol or lactate%3B located in the mitochondrial inner membrane [Source:SGD%3BAcc:S000002333]	IV	145826	147589	-	851380
4400	YKR049C	7092.04	-1.52004	0.186999	3.90131e-17	6.26398e-15	FMP46	Putative redox protein containing a thioredoxin fold%3B the authentic%2C non-tagged protein is detected in highly purified mitochondria in high-throughput studies [Source:SGD%3BAcc:S000001757]	XI	526830	527231	-	853923
3648	YIL170W	327.485	-1.51762	0.387055	6.79455e-06	9.41653e-05	NA	NA	NA	NA	NA	NA	854636
1025	YBR296C	9494.72	-1.51567	1.15856	0.00633576	0.0282181	PHO89	Plasma membrane Na+/Pi cotransporter%3B active in early growth phase%3B similar to phosphate transporters of Neurospora crassa%3B transcription regulated by inorganic phosphate concentrations and Pho4p%3B mutations in related human transporter genes hPit	II	796798	798522	-	852599
1060	YCL027W	2635.15	-1.5141	0.348138	1.09951e-06	1.96154e-05	FUS1	Membrane protein localized to the shmoo tip%3B required for cell fusion%3B expression regulated by mating pheromone%3B proposed to coordinate signaling%2C fusion%2C and polarization events required for fusion%3B potential Cdc28p substrate [Source:SGD%3BA	III	71803	73341	+	850330
6796	YPL185W	137.728	-1.50908	0.41984	2.36261e-05	0.000270488	NA	Dubious open reading frame%3B unlikely to encode a functional protein%2C based on available experimental and comparative sequence data%3B partially overlaps the verified gene UIP4/YPL186C [Source:SGD%3BAcc:S000006106]	XVI	195253	195648	+	NA
1719	YDR216W	10385.9	-1.50665	0.229224	4.34505e-12	2.93296e-10	ADR1	Carbon source-responsive zinc-finger transcription factor%3B required for transcription of the glucose-repressed gene ADH2%2C of peroxisomal protein genes%2C and of genes required for ethanol%2C glycerol%2C and fatty acid utilization [Source:SGD%3BAcc:S0	IV	895035	899006	+	851802
2152	YEL066W	1370.01	-1.50643	0.326639	3.26842e-07	6.84641e-06	HPA3	D-Amino acid N-acetyltransferase that detoxifies D-amino acids%3B catalyzes N-acetylation of D-amino acids through ordered bi-bi mechanism in which acetyl-CoA is first substrate bound and CoA is last product liberated%3B acetylates histones and polyamine	V	26667	27206	+	856642
6910	YPR007C	613.221	-1.50574	0.249056	1.89762e-10	9.0522e-09	REC8	Meiosis-specific component of the sister chromatid cohesion complex%3B alpha-kleisin family member that maintains cohesion between sister chromatids during meiosis I%3B maintains cohesion between centromeres of sister chromatids until meiosis II%3B indep	XVI	569336	571378	-	856115
2540	YFR054C	107.021	-1.50428	0.375544	4.97967e-06	7.11088e-05	NA	Putative protein of unknown function%3B conserved among S. cerevisiae strains [Source:SGD%3BAcc:S000001950]	VI	258855	259433	-	850615
6050	YOL047C	1101.28	-1.49995	0.626528	0.000979701	0.00627982	LDS2	Protein Involved in spore wall assembly%3B localizes to lipid droplets found on or outside of the prospore membrane%3B shares similarity with Lds1p and Rrt8p%2C and a strain mutant for all 3 genes exhibits reduced dityrosine fluorescence relative to the	XV	241614	242747	-	854110
1027	YBR297W	4599.29	-1.49907	0.37984	6.13163e-06	8.56997e-05	MAL33	MAL-activator protein%3B part of complex locus MAL3%3B nonfunctional in genomic reference strain S288C [Source:SGD%3BAcc:S000000501]	II	800523	801929	+	852600
2669	YGL121C	7013.01	-1.49778	0.242196	5.50581e-11	3.0204e-09	GPG1	Proposed gamma subunit of the heterotrimeric G protein%3B interacts with the receptor Gpr1p%3B involved in regulation of pseudohyphal growth%3B requires Gpb1p or Gpb2p to interact with Gpa2p%3B overproduction causes prion curing [Source:SGD%3BAcc:S000003	VII	280777	281157	-	852756
924	YBR201C-A	1152.04	-1.49016	0.331911	5.84398e-07	1.13484e-05	NA	Putative protein of unknown function [Source:SGD%3BAcc:S000087085]	II	624493	624696	-	3799967
5206	YMR008C	8990.01	-1.48137	0.205625	5.29866e-14	5.45017e-12	PLB1	Phospholipase B (lysophospholipase) involved in lipid metabolism%3B required for efficient acyl chain remodeling of newly synthesized phosphatidylethanolamine-derived phosphatidylcholine%3B required for deacylation of phosphatidylcholine and phosphatidyl	XIII	280590	282584	-	855020
6590	YOR383C	6723.34	-1.47795	0.407061	2.18549e-05	0.000252849	FIT3	Mannoprotein that is incorporated into the cell wall%3B incorporated via a glycosylphosphatidylinositol (GPI) anchor%3B involved in the retention of siderophore-iron in the cell wall [Source:SGD%3BAcc:S000005910]	XV	1060441	1061055	-	854565
4838	YLR279W	284.952	-1.47626	0.348365	1.86054e-06	3.06965e-05	NA	Dubious open reading frame%3B unlikely to encode a functional protein%2C based on available experimental and comparative sequence data [Source:SGD%3BAcc:S000004269]	XII	704309	704698	+	NA
956	YBR230C	27920.9	-1.47517	0.318798	3.0818e-07	6.56553e-06	OM14	Mitochondrial outer membrane receptor for cytosolic ribosomes%3B integral protein of the outer membrane that interacts with the nascent chain-associated complex (NAC) bound to ribosomes%2C contributing to co-translational mitochondrial import%3B interact	II	679549	680050	-	852531
783	YBR076W	414.301	-1.46504	0.334058	9.56845e-07	1.73524e-05	ECM8	Non-essential protein of unknown function [Source:SGD%3BAcc:S000000280]	II	390227	391291	+	852368
4341	YKL216W	42561.9	-1.46061	0.232363	2.98347e-11	1.81854e-09	URA1	Dihydroorotate dehydrogenase%3B catalyzes the fourth enzymatic step in the de novo biosynthesis of pyrimidines%2C converting dihydroorotic acid into orotic acid [Source:SGD%3BAcc:S000001699]	XI	25215	26159	+	853664
4646	YLR112W	361.298	-1.4606	0.435942	5.99684e-05	0.000605478	NA	Putative protein of unknown function%3B conserved across S. cerevisiae strains [Source:SGD%3BAcc:S000004102]	XII	370791	371210	+	850802
3474	YIL011W	2344.41	-1.45967	0.248376	3.75668e-10	1.63776e-08	TIR3	Cell wall mannoprotein%3B member of Srp1p/Tip1p family of serine-alanine-rich proteins%3B expressed under anaerobic conditions and required for anaerobic growth%3B TIR3 has a paralog%2C TIR2%2C that arose from the whole genome duplication [Source:SGD%3BA	IX	333727	334536	+	854804
1726	YDR223W	1523.68	-1.45605	0.265143	3.57082e-09	1.19932e-07	CRF1	Transcriptional corepressor%3B involved in repression of ribosomal protein (RP) gene transcription via the TOR signaling pathway which promotes accumulation of Crf1p in the nucleus%3B role in repression of RP genes varies by strain%3B CRF1 has a paralog%	IV	912099	913502	+	851809
6898	YPL281C	1074.87	-1.45511	0.465266	0.000132102	0.00116886	ERR2	Enolase%2C a phosphopyruvate hydratase%3B catalyzes the conversion of 2-phosphoglycerate to phosphoenolpyruvate%3B complements the growth defect of an ENO1 ENO2 double mutant [Source:SGD%3BAcc:S000006202]	XVI	9557	10870	-	855848
5185	YML123C	40304.1	-1.45331	1.05883	0.00633975	0.0282181	PHO84	High-affinity inorganic phosphate (Pi) transporter%3B also low-affinity manganese transporter%3B regulated by Pho4p and Spt7p%3B mutation confers resistance to arsenate%3B exit from the ER during maturation requires Pho86p%3B cells overexpressing Pho84p	XIII	24037	25800	-	854916
6464	YOR268C	33.2722	-1.45101	1.30348	0.00778908	0.0329958	NA	Putative protein of unknown function%3B sporulation is abnormal in homozygous diploid%3B SWAT-GFP fusion protein localizes to the nucleus%3B YOR268C is not an essential gene [Source:SGD%3BAcc:S000005794]	XV	825534	825932	-	854442
6434	YOR237W	464.315	-1.44446	0.445844	9.60249e-05	0.000900472	HES1	Protein implicated in the regulation of ergosterol biosynthesis%3B one of a seven member gene family with a common essential function and non-essential unique functions%3B similar to human oxysterol binding protein (OSBP)%3B SWAT-GFP and mCherry fusion p	XV	781994	783298	+	854412
243	tH(GUG)E2	52.4603	-1.43961	1.16413	0.00861019	0.0357834	NA	NA	NA	NA	NA	NA	856871
6600	YOR393W	1029.48	-1.42299	0.547764	0.000639814	0.00442426	ERR1	Putative phosphopyruvate hydratase [Source:SGD%3BAcc:S000005920]	XV	1080276	1081589	+	854575
3640	YIL160C	12269.6	-1.42022	0.499762	0.000316754	0.00244436	POT1	3-ketoacyl-CoA thiolase with broad chain length specificity%3B cleaves 3-ketoacyl-CoA into acyl-CoA and acetyl-CoA during beta-oxidation of fatty acids [Source:SGD%3BAcc:S000001422]	IX	40191	41444	-	854646
2733	YGL184C	669.376	-1.41993	0.490118	0.000270268	0.00213075	STR3	Peroxisomal cystathionine beta-lyase%3B converts cystathionine into homocysteine%3B may be redox regulated by Gto1p%3B involved in the release of the aromatic thiol 3-mercaptohexanol during wine fermentation [Source:SGD%3BAcc:S000003152]	VII	154615	156012	-	852691
4689	YLR152C	3221.19	-1.40704	0.190095	1.30264e-14	1.4785e-12	NA	Putative protein of unknown function%3B YLR152C is not an essential gene [Source:SGD%3BAcc:S000004142]	XII	442958	444688	-	850845
6443	YOR247W	5184.75	-1.39254	0.478354	0.00026961	0.00212811	SRL1	Mannoprotein that exhibits a tight association with the cell wall%3B required for cell wall stability in the absence of GPI-anchored mannoproteins%3B has a high serine-threonine content%3B expression is induced in cell wall mutants%3B SRL1 has a paralog%	XV	797676	798308	+	854421
3515	YIL046W-A	57.0826	-1.38791	0.732763	0.00322787	0.0166659	NA	Putative protein of unknown function%3B identified by expression profiling and mass spectrometry [Source:SGD%3BAcc:S000028836]	IX	268309	268473	+	1466492
5595	YNL034W	128.393	-1.38676	0.372298	1.6485e-05	0.000200593	NA	Putative protein of unknown function%3B not an essential gene%3B YNL034W has a paralog%2C YNL018C%2C that arose from a segmental duplication [Source:SGD%3BAcc:S000004979]	XIV	570477	572315	+	855697
6922	YPR017C	883.964	-1.38493	0.260577	1.07557e-08	3.21841e-07	DSS4	Guanine nucleotide dissociation stimulator for Sec4p%3B functions in the post-Golgi secretory pathway%3B binds zinc%2C found both on membranes and in the cytosol [Source:SGD%3BAcc:S000006221]	XVI	593486	593917	-	856128
1455	YDL222C	17075.4	-1.38302	0.648077	0.00194699	0.0110017	FMP45	Integral membrane protein localized to mitochondria%3B required for sporulation and maintaining sphingolipid content%3B similar to SUR7%3B FMP45 has a paralog%2C YNL194C%2C that arose from the whole genome duplication [Source:SGD%3BAcc:S000002381]	IV	60872	61801	-	851304
605	YBL029W	2322.45	-1.38237	0.195452	1.5062e-13	1.37712e-11	NA	Non-essential protein of unknown function [Source:SGD%3BAcc:S000000125]	II	166134	167264	+	852252
6006	YOL007C	2417.88	-1.37692	0.416711	7.72521e-05	0.000752293	CSI2	Protein of unknown function%3B green fluorescent protein (GFP)- fusion protein localizes to the mother side of the bud neck and the vacuole%3B YOL007C is not an essential gene [Source:SGD%3BAcc:S000005367]	XV	311342	312367	-	854155
4589	YLR056W	19488.3	-1.37473	0.644768	0.00202935	0.0113695	ERG3	C-5 sterol desaturase%3B glycoprotein that catalyzes the introduction of a C-5(6) double bond into episterol%2C a precursor in ergosterol biosynthesis%3B transcriptionally down-regulated when ergosterol is in excess%3B mutants are viable%2C but cannot gr	XII	253861	254958	+	850745
5472	YMR247W-A	206.884	-1.36658	0.28889	2.14301e-07	4.73405e-06	NA	Putative protein of unknown function%3B SWAT-GFP fusion protein localizes to the endoplasmic reticulum and vacuole%2C while mCherry fusion localizes to just the vacuole [Source:SGD%3BAcc:S000028849]	XIII	769283	769426	+	1466506
721	YBR018C	509.394	-1.36635	0.23799	9.17299e-10	3.59439e-08	GAL7	Galactose-1-phosphate uridyl transferase%3B synthesizes glucose-1-phosphate and UDP-galactose from UDP-D-glucose and alpha-D-galactose-1-phosphate in the second step of galactose catabolism%3B human homolog UGP2 can complement yeast null mutant [Source:S	II	274427	275527	-	852306
1444	YDL211C	870.455	-1.3657	0.337882	4.91685e-06	7.03644e-05	NA	Protein of unknown function%3B green fluorescent protein (GFP)-fusion protein localizes to the vacuole%3B YDL211C has a paralog%2C TDA7%2C that arose from the whole genome duplication [Source:SGD%3BAcc:S000002370]	IV	79294	80412	-	851315
3748	YJL043W	164.823	-1.36477	0.33684	4.59564e-06	6.66368e-05	NA	Putative protein of unknown function%3B YJL043W is a non-essential gene [Source:SGD%3BAcc:S000003579]	X	360130	360903	+	853407
1149	YCR037C	5022.22	-1.35514	0.195118	3.8315e-13	3.19275e-11	PHO87	Low-affinity inorganic phosphate (Pi) transporter%3B acts upstream of Pho81p in regulation of the PHO pathway%3B expression is independent of Pi concentration and Pho4p activity%3B contains 12 membrane-spanning segments%3B PHO87 has a paralog%2C PHO90%2C	III	194414	197185	-	850403
1479	YDL245C	1468.67	-1.34829	0.194395	4.11811e-13	3.30604e-11	HXT15	Putative transmembrane polyol transporter%3B supports growth on and uptake of mannitol%2C sorbitol and xylitol with moderate affinity when overexpressed in a strain deleted for hexose family members%3B minor hexose transport activity when overexpressed i	IV	11657	13360	-	851352
3075	YGR239C	1973.67	-1.34754	0.34732	9.24696e-06	0.000123474	PEX21	Peroxin required for peroxisomal matrix protein targeting%3B acts on proteins containing the PTS2 targeting sequence%3B interacts with Pex7p%3B constitutively expressed%3B partially redundant with Pex18p%3B required for import of the Gpd1p-Pnc1p heterodi	VII	969187	970053	-	853154
6812	YPL200W	583.305	-1.34684	0.36814	2.18491e-05	0.000252849	CSM4	Protein required for accurate chromosome segregation during meiosis%3B involved in meiotic telomere clustering (bouquet formation) and telomere-led rapid prophase movements%3B functions with meiosis-specific telomere-binding protein Ndj1p%3B CSM4 has a p	XVI	171484	171954	+	855901
5330	YMR122C	364.668	-1.34611	0.281203	2.989e-07	6.3885e-06	NA	Putative protein of unknown function%3B conserved among S. cerevisiae strains%3B YMR122C is not an essential gene [Source:SGD%3BAcc:S000004729]	XIII	510701	511075	-	855151
3851	YJL137C	5400.61	-1.34417	0.228974	4.29692e-10	1.82494e-08	GLG2	Glycogenin glucosyltransferase%3B self-glucosylating initiator of glycogen synthesis%2C also glucosylates n-dodecyl-beta-D-maltoside%3B similar to mammalian glycogenin%3B GLG2 has a paralog%2C GLG1%2C that arose from the whole genome duplication [Source:	X	154985	156127	-	853304
1401	YDL169C	3593.61	-1.34388	0.310538	1.3676e-06	2.36919e-05	UGX2	Protein of unknown function%3B transcript accumulates in response to any combination of stress conditions [Source:SGD%3BAcc:S000002328]	IV	158064	158735	-	851385
5506	YMR280C	6684.49	-1.34287	0.193531	4.03677e-13	3.28075e-11	CAT8	Zinc cluster transcriptional activator%3B necessary for derepression of a variety of genes under non-fermentative growth conditions%2C active after diauxic shift%2C binds carbon source responsive elements%3B relative distribution to the nucleus increases	XIII	827028	831329	-	855323
2381	YER175C	4278.69	-1.329	0.260147	3.16535e-08	8.54383e-07	TMT1	Trans-aconitate methyltransferase%3B cytosolic enzyme that catalyzes the methyl esterification of 3-isopropylmalate%2C an intermediate of the leucine biosynthetic pathway%2C and trans-aconitate%2C which inhibits the citric acid cycle [Source:SGD%3BAcc:S0	V	539464	540363	-	856922
2162	YEL075W-A	17.1846	-1.32042	0.803501	0.00550038	0.0253387	YEL075W-A	Dubious open reading frame%3B unlikely to encode a functional protein%2C based on available experimental and comparative sequence data [Source:SGD%3BAcc:S000002956]	V	4870	5481	+	NA
4984	YLR410W-B	5101.06	-1.3151	0.289923	5.52397e-07	1.08227e-05	NA	NA	NA	NA	NA	NA	851128
3706	YIR041W	59.043	-1.30994	0.596874	0.00250479	0.0136048	PAU15	Protein of unknown function%3B member of the seripauperin multigene family encoded mainly in subtelomeric regions%3B SWAT-GFP and mCherry fusion proteins localize to the vacuole [Source:SGD%3BAcc:S000001480]	IX	433929	434303	+	854859
522	YAL061W	20074.3	-1.30648	0.217823	2.05234e-10	9.65039e-09	BDH2	Putative medium-chain alcohol dehydrogenase with similarity to BDH1%3B transcription induced by constitutively active PDR1 and PDR3 [Source:SGD%3BAcc:S000000057]	I	33448	34701	+	851238
3785	YJL077C	298.518	-1.30618	0.231749	2.45338e-09	8.63668e-08	ICS3	Protein with a role in copper homeostasis%3B possible role in vacuolar sorting and processing of secretory proteins%3B null mutants are hypersensitive to sortin2 [Source:SGD%3BAcc:S000003613]	X	294666	295061	-	853368
6931	YPR026W	7409.56	-1.30158	0.227094	1.02047e-09	3.86077e-08	ATH1	Acid trehalase required for utilization of extracellular trehalose%3B involved in intracellular trehalose degradation during growth recovery after saline stress [Source:SGD%3BAcc:S000006230]	XVI	615379	619014	+	856137
1083	YCL049C	4316.61	-1.30148	0.308821	2.3795e-06	3.802e-05	NA	Protein of unknown function%3B localizes to membrane fraction%3B YCL049C is not an essential gene [Source:SGD%3BAcc:S000000554]	III	39786	40724	-	850308
2283	YER091C	27065.1	-1.30114	1.12951	0.00889716	0.0366292	MET6	Cobalamin-independent methionine synthase%3B involved in methionine biosynthesis and regeneration%3B requires a minimum of two glutamates on the methyltetrahydrofolate substrate%2C similar to bacterial metE homologs [Source:SGD%3BAcc:S000000893]	V	339864	342167	-	856825
6271	YOR084W	2328.38	-1.2991	0.325838	6.27981e-06	8.73995e-05	LPX1	Peroxisomal matrix-localized lipase%3B required for normal peroxisome morphology%3B contains a peroxisomal targeting signal type 1 (PTS1) and a lipase motif%3B peroxisomal import requires the PTS1 receptor%2C Pex5p and self-interaction%3B transcriptional	XV	480587	481750	+	854251
1744	YDR241W	440.293	-1.29263	0.337501	1.19181e-05	0.000154442	BUD26	Dubious open reading frame%3B unlikely to encode a functional protein%2C based on available experimental and comparative sequence data%3B not conserved in closely related Saccharomyces species%3B 1%25 of ORF overlaps the verified gene SNU56%3B diploid mu	IV	945151	945438	+	NA
3789	YJL079C	17547.2	-1.29102	0.469231	0.000470709	0.00342017	PRY1	Sterol binding protein involved in the export of acetylated sterols%3B secreted glycoprotein and member of the CAP protein superfamily (cysteine-rich secretory proteins (CRISP)%2C antigen 5%2C and pathogenesis related 1 proteins)%3B sterol export functio	X	289875	290774	-	853366
3081	YGR244C	21935.1	-1.28932	0.258251	6.01077e-08	1.52776e-06	LSC2	Beta subunit of succinyl-CoA ligase%3B succinyl-CoA ligase is a mitochondrial enzyme of the TCA cycle that catalyzes the nucleotide-dependent conversion of succinyl-CoA to succinate [Source:SGD%3BAcc:S000003476]	VII	978036	979319	-	853159
1125	YCR018C	1442.19	-1.28565	0.342624	1.63617e-05	0.000199831	SRD1	Protein involved in the processing of pre-rRNA to mature rRNA%3B contains a C2/C2 zinc finger motif%3B srd1 mutation suppresses defects caused by the rrp1-1 mutation [Source:SGD%3BAcc:S000000611]	III	148238	148903	-	850377
5302	YMR096W	2039.84	-1.28528	0.400672	0.000116575	0.00104981	SNZ1	Protein involved in vitamin B6 biosynthesis%3B member of a stationary phase-induced gene family%3B coregulated with SNO1%3B interacts with Sno1p and with Yhr198p%2C perhaps as a multiprotein complex containing other Snz and Sno proteins [Source:SGD%3BAcc	XIII	458408	459301	+	855121
5078	YML027W	1914.93	-1.2852	0.362609	3.59949e-05	0.000389728	YOX1	Homeobox transcriptional repressor%3B binds to Mcm1p and to early cell cycle boxes (ECBs) in the promoters of cell cycle-regulated genes expressed in M/G1 phase%3B expression is cell cycle-regulated%3B phosphorylated by Cdc28p%3B relocalizes from nucleus	XIII	221406	222563	+	854981
5218	YMR018W	321.75	-1.27768	0.35749	3.23248e-05	0.000358844	PEX9	Putative protein of unknown function with similarity to human PEX5Rp%3B transcription increases during colony development similar to genes involved in peroxisome biogenesis%3B YMR018W is not an essential gene%3B PEX5Rp is also known as peroxin protein 5	XIII	310208	311752	+	855032
4107	YJR158W	920.82	-1.27555	0.195003	7.04686e-12	4.59302e-10	HXT16	Putative transmembrane polyol transporter%3B supports growth on and uptake of sorbitol with moderate affinity and mannitol with lower affinity when overexpressed in a strain deleted for hexose family members%3B minor hexose transport activity when overex	X	732440	734143	+	853623
3315	YHR095W	35.0567	-1.27243	0.987422	0.008478	0.0353734	NA	Dubious open reading frame%3B unlikely to encode a functional protein%2C based on available experimental and comparative sequence data [Source:SGD%3BAcc:S000001137]	VIII	292943	293437	+	NA
4843	YLR284C	2433.04	-1.27093	0.379637	7.33126e-05	0.000716048	ECI1	Peroxisomal delta3%2Cdelta2-enoyl-CoA isomerase%3B hexameric protein that converts 3-hexenoyl-CoA to trans-2-hexenoyl-CoA%2C essential for the beta-oxidation of unsaturated fatty acids%2C oleate-induced%3B ECI1 has a paralog%2C DCI1%2C that arose from th	XII	706198	707040	-	850990
6529	YOR328W	4349.43	-1.26035	0.224373	2.0762e-09	7.3879e-08	PDR10	ATP-binding cassette (ABC) transporter%3B multidrug transporter involved in the pleiotropic drug resistance network%3B regulated by Pdr1p and Pdr3p [Source:SGD%3BAcc:S000005855]	XV	931803	936497	+	854506
6756	YPL147W	3081.41	-1.26002	0.158301	1.94199e-16	2.84092e-14	PXA1	Subunit of heterodimeric peroxisomal ABC transport complex%2C with Pxa2p%3B required for import of long-chain fatty acids into peroxisomes%3B similar to human adrenoleukodystrophy transporters ABCD1and ABCD2%2C and ALD-related proteins%3B mutations in AB	XVI	273255	275867	+	855956
524	YAL063C	1808.17	-1.25258	0.261345	1.71605e-07	3.86875e-06	FLO9	Lectin-like protein with similarity to Flo1p%3B thought to be expressed and involved in flocculation [Source:SGD%3BAcc:S000000059]	I	24000	27968	-	851236
6193	YOR011W-A	31.2487	-1.25223	0.670141	0.00411699	0.020286	NA	Putative protein of unknown function [Source:SGD%3BAcc:S000028581]	XV	355652	355858	+	1466479
225	tG(GCC)D2	48.4861	-1.25177	0.845467	0.00707375	0.0305755	NA	NA	NA	NA	NA	NA	851854
6481	YOR285W	14502.7	-1.24915	0.242575	2.77392e-08	7.57705e-07	RDL1	Thiosulfate sulfurtransferase%3B contains a rhodanese-like domain%3B localized to the mitochondrial outer membrane%3B protein abundance increases in response to DNA replication stress%3B similar to the human TSTD gene [Source:SGD%3BAcc:S000005811]	XV	849635	850054	+	854459
6919	YPR015C	1481.3	-1.24887	0.319753	9.14622e-06	0.000122555	NA	Putative zinc finger transcription factor%3B binds DNA in sequence-specific manner%3B overexpression causes a cell cycle delay or arrest [Source:SGD%3BAcc:S000006219]	XVI	590283	591026	-	856125
60	RME2	13.7584	-1.2488	1.47616	0.0111261	0.0438057	NA	NA	NA	NA	NA	NA	23547380
6602	YOR394W	35.9015	-1.2391	1.55678	0.0220668	0.0747637	PAU21	Protein of unknown function%3B member of the seripauperin multigene family encoded mainly in subtelomeric regions%3B SWAT-GFP%2C seamless-GFP and mCherry fusion proteins localize to the cytosol%3B identical to Pau22p%3B encodes two proteins that are tran	XV	1082718	1083212	+	854576
1447	YDL214C	3856.82	-1.23771	0.443884	0.000449038	0.00329912	PRR2	Serine/threonine protein kinase%3B inhibits pheromone induced signalling downstream of MAPK%2C possibly at the level of the Ste12p transcription factor%3B mutant has increased aneuploidy tolerance%3B PRR2 has a paralog%2C NPR1%2C that arose from the whol	IV	74446	76545	-	851312
4343	YKL218C	3046.4	-1.23556	0.197151	4.10941e-11	2.394e-09	SRY1	3-hydroxyaspartate dehydratase%3B deaminates L-threo-3-hydroxyaspartate to form oxaloacetate and ammonia%3B required in the presence of hydroxyaspartate%3B highly similar to mouse serine racemase (Srr) but has no serine racemase activity [Source:SGD%3BAc	XI	17359	18339	-	853662
927	YBR203W	2492.7	-1.21891	0.322304	1.55836e-05	0.000191752	COS111	Protein required for antifungal drug ciclopirox olamine resistance%3B not related to the subtelomerically-encoded COS family%3B the authentic%2C non-tagged protein is detected in highly purified mitochondria in high-throughput studies [Source:SGD%3BAcc:S	II	629168	631942	+	852502
2270	YER084W	185.806	-1.2146	0.618165	0.00338649	0.017295	NA	Protein of unknown function%3B expressed at both mRNA and protein levels [Source:SGD%3BAcc:S000000886]	V	327065	327451	+	856816
3599	YIL123W	8306.85	-1.21036	0.256787	2.66081e-07	5.74299e-06	SIM1	Protein of the SUN family (Sim1p%2C Uth1p%2C Nca3p%2C Sun4p)%3B may participate in DNA replication%3B promoter contains SCB regulation box at -300 bp indicating that expression may be cell cycle-regulated%3B SIM1 has a paralog%2C SUN4%2C that arose from	IX	128151	129581	+	854683
3525	YIL055C	2453.73	-1.19904	0.191031	4.04675e-11	2.37855e-09	NA	Putative protein of unknown function [Source:SGD%3BAcc:S000001317]	IX	252042	253925	-	854756
3724	YJL019W	1523	-1.1983	0.303383	8.25955e-06	0.000112109	MPS3	Nuclear envelope protein%3B required for SPB insertion%2C SPB duplication%2C Kar5p localization near the SPB and nuclear fusion%3B interacts with Mps2p to tether half-bridge to core SPB%3B N-terminal acetylation by Eco1p regulates its role in nuclear org	X	402897	404945	+	853434
2438	YFL030W	22791.8	-1.19606	0.389153	0.000198558	0.00164831	AGX1	Alanine:glyoxylate aminotransferase (AGT)%3B catalyzes the synthesis of glycine from glyoxylate%2C which is one of three pathways for glycine biosynthesis in yeast%3B similar to mammalian and plant alanine:glyoxylate aminotransferases%3B human homolog AG	VI	76831	77988	+	850514
3935	YJL219W	784.666	-1.19558	0.191008	4.58279e-11	2.62335e-09	HXT9	Putative hexose transporter that is nearly identical to Hxt11p%3B has similarity to major facilitator superfamily (MFS) transporters%2C expression of HXT9 is regulated by transcription factors Pdr1p and Pdr3p [Source:SGD%3BAcc:S000003755]	X	19497	21200	+	853236
4790	YLR234W	593.946	-1.19551	0.31291	1.39201e-05	0.000175885	TOP3	DNA Topoisomerase III%3B conserved protein that functions in a complex with Sgs1p and Rmi1p to relax single-stranded negatively-supercoiled DNA preferentially%3B DNA catenation/decatenation activity is stimulated by RPA and Sgs1p-Top3p-Rmi1p%3B involved	XII	609783	611753	+	850935
3222	YHR021W-A	95.1531	-1.18912	0.676039	0.00503858	0.0237091	ECM12	Putative protein of unknown function%3B may contribute to cell wall biosynthesis%2C mutants display zymolyase hypersensitivity [Source:SGD%3BAcc:S000003531]	VIII	149225	149680	+	856416
4826	YLR267W	3753.56	-1.18807	0.684653	0.00524828	0.0243993	BOP2	Protein of unknown function [Source:SGD%3BAcc:S000004257]	XII	678212	679924	+	850972
6164	YOL155C	16874.6	-1.18726	0.207632	1.25315e-09	4.58304e-08	HPF1	Haze-protective mannoprotein%3B reduces the particle size of aggregated proteins in white wines [Source:SGD%3BAcc:S000005515]	XV	28703	31606	-	854010
6720	YPL113C	1009	-1.18649	0.251901	2.77064e-07	5.94107e-06	NA	Glyoxylate reductase%3B acts on glyoxylate and hydroxypyruvate substrates%3B YPL113C is not an essential gene [Source:SGD%3BAcc:S000006034]	XVI	335953	337143	-	855990
2330	YER135C	79.4527	-1.18344	0.462014	0.000923772	0.00598542	NA	Putative protein of unknown function%3B conserved among S. cerevisiae strains%3B YER135C is not an essential gene [Source:SGD%3BAcc:S000000937]	V	437952	438344	-	856874
5341	YMR132C	605.009	-1.18258	0.230161	3.23778e-08	8.60576e-07	JLP2	Protein of unknown function%3B contains sequence that closely resembles a J domain (typified by the E. coli DnaJ protein) [Source:SGD%3BAcc:S000004739]	XIII	534944	535570	-	855162
6088	YOL083W	3026.36	-1.17833	0.257684	5.36141e-07	1.06308e-05	ATG34	Receptor protein involved in selective autophagy during starvation%3B specifically involved in the transport of cargo protein alpha-mannosidase (Ams1p)%3B Atg19p paralog [Source:SGD%3BAcc:S000005443]	XV	165714	166952	+	854071
2056	YDR528W	1562.18	-1.17444	0.403466	0.000345195	0.00262597	HLR1	Protein involved in regulation of cell wall composition and integrity%3B also involved in cell wall response to osmotic stress%3B overproduction suppresses a lysis sensitive PKC mutation%3B HLR1 has a paralog%2C LRE1%2C that arose from the whole genome d	IV	1494586	1495857	+	852141
627	YBL049W	3735.47	-1.17315	0.294302	7.25008e-06	9.98478e-05	MOH1	Protein of unknown function%2C essential for stationary phase survival%3B not required for growth on nonfermentable carbon sources%3B possibly linked with vacuolar transport [Source:SGD%3BAcc:S000000145]	II	126828	127244	+	852231
5766	YNL193W	1923.21	-1.17119	0.160429	3.54682e-14	3.76592e-12	NA	Putative protein of unknown function%3B exhibits a two-hybrid interaction with Yhr151cp in a large-scale analysis [Source:SGD%3BAcc:S000005137]	XIV	274368	276044	+	855528
3238	YHR033W	4366.47	-1.17053	0.675241	0.00538929	0.0249667	NA	Putative protein of unknown function%3B epitope-tagged protein localizes to the cytoplasm%3B YHR033W has a paralog%2C PRO1%2C that arose from the whole genome duplication [Source:SGD%3BAcc:S000001075]	VIII	175548	176819	+	856428
873	YBR156C	1294.89	-1.168	0.192215	1.4857e-10	7.35364e-09	SLI15	Subunit of the conserved chromosomal passenger complex (CPC)%3B complex regulates kinetochore-microtubule attachments%2C activation of the spindle tension checkpoint%2C and mitotic spindle disassembly%3B other complex members are Ipl1p%2C Bir1p%2C and Nb	II	551104	553200	-	852453
1596	YDR104C	2328.75	-1.16243	0.212933	5.71194e-09	1.79288e-07	SPO71	Meiosis-specific protein required for prospore membrane morphogenesis%3B localizes to the prospore membrane (PSM) during sporulation%3B required for PSM elongation and closure%3B genetically antagonistic to SPO1%3B recruits Vps13p to the PSM during sporu	IV	661173	664910	-	851681
3500	YIL032C	34.4775	-1.15858	0.597995	0.00393948	0.0195725	NA	Dubious open reading frame%3B unlikely to encode a functional protein%2C based on available experimental and comparative sequence data [Source:SGD%3BAcc:S000001294]	IX	291961	292317	-	NA
5094	YML042W	24521.1	-1.15739	0.642507	0.00488139	0.0231181	CAT2	Carnitine acetyl-CoA transferase%3B present in both mitochondria and peroxisomes%3B transfers activated acetyl groups to carnitine to form acetylcarnitine which can be shuttled across membranes [Source:SGD%3BAcc:S000004506]	XIII	192788	194800	+	854965
2732	YGL183C	115.126	-1.15674	0.364322	0.000151606	0.00130803	MND1	Protein required for recombination and meiotic nuclear division%3B forms a complex with Hop2p%2C which is involved in chromosome pairing and repair of meiotic double-strand breaks [Source:SGD%3BAcc:S000003151]	VII	156543	157285	-	852692
2931	YGR108W	6581.83	-1.1562	0.259997	1.00195e-06	1.80214e-05	CLB1	B-type cyclin involved in cell cycle progression%3B activates Cdc28p to promote the transition from G2 to M phase%3B accumulates during G2 and M%2C then targeted via a destruction box motif for ubiquitin-mediated degradation by the proteasome%3B CLB1 has	VII	703636	705051	+	853002
6871	YPL256C	2658.37	-1.15498	0.349649	9.96646e-05	0.000921724	CLN2	G1 cyclin involved in regulation of the cell cycle%3B activates Cdc28p kinase to promote the G1 to S phase transition%3B late G1 specific expression depends on transcription factor complexes%2C MBF (Swi6p-Mbp1p) and SBF (Swi6p-Swi4p)%3B CLN2 has a paralo	XVI	64977	66614	-	855819
2243	YER064C	2622.82	-1.1523	0.645711	0.00515309	0.0240929	VHR2	Non-essential nuclear protein%3B null mutation has global effects on transcription%3B VHR2 has a paralog%2C VHR1%2C that arose from the whole genome duplication%3B relative distribution to the nucleus increases upon DNA replication stress [Source:SGD%3BA	V	282705	284222	-	856793
120	snR60	15.6239	-1.14878	1.10303	0.0118402	0.0459576	NA	NA	NA	NA	NA	NA	9164911
3175	YHL032C	12181.6	-1.14271	0.202063	1.90937e-09	6.83119e-08	GUT1	Glycerol kinase%3B converts glycerol to glycerol-3-phosphate%3B glucose repression of expression is mediated by Adr1p and Ino2p-Ino4p%3B derepression of expression on non-fermentable carbon sources is mediated by Opi1p and Rsf1p [Source:SGD%3BAcc:S000001	VIII	36379	38508	-	856353
6214	YOR032C	981.111	-1.14079	0.190538	2.65716e-10	1.22322e-08	HMS1	bHLH protein with similarity to myc-family transcription factors%3B overexpression confers hyperfilamentous growth and suppresses the pseudohyphal filamentation defect of a diploid mep1 mep2 homozygous null mutant [Source:SGD%3BAcc:S000005558]	XV	389771	391075	-	854197
4428	YKR076W	7992.51	-1.14006	0.367131	0.00019365	0.0016096	ECM4	S-glutathionyl-(chloro)hydroquinone reductase (GS-HQR)%3B glutathione transferase involved in cell-surface biosynthesis and architecture%3B catalyzes glutathione (GSH)-dependent reduction of GS-trichloro-p-hydroquinone to trichloro-p-hydroquinone%3B expr	XI	582283	583395	+	853951
2954	YGR127W	3171.21	-1.13979	0.198384	1.13217e-09	4.22818e-08	NA	Putative protein of unknown function%3B expression is regulated by Msn2p/Msn4p%2C indicating a possible role in stress response [Source:SGD%3BAcc:S000003359]	VII	746798	747736	+	853028
2519	YFR035C	565.104	-1.13515	0.422707	0.00069682	0.00471445	NA	Putative protein of unknown function%3B deletion mutant exhibits synthetic phenotype with alpha-synuclein [Source:SGD%3BAcc:S000001931]	VI	226121	226465	-	850595
5569	YNL009W	1893.82	-1.13495	0.223709	4.73693e-08	1.23743e-06	IDP3	Peroxisomal NADP-dependent isocitrate dehydrogenase%3B catalyzes oxidation of isocitrate to alpha-ketoglutarate with the formation of NADP(H+)%2C required for growth on unsaturated fatty acids%3B IDP3 has a paralog%2C IDP2%2C that arose from the whole ge	XIV	614821	616083	+	855723
4140	YKL026C	6989.58	-1.13423	0.342601	9.83408e-05	0.000916586	GPX1	Phospholipid hydroperoxide glutathione peroxidase%3B induced by glucose starvation that protects cells from phospholipid hydroperoxides and nonphospholipid peroxides during oxidative stress%3B GPX1 has a paralog%2C HYR1%2C that arose from the whole genom	XI	389380	389883	-	853842
528	YAL064W-B	127.924	-1.13158	0.395332	0.000429341	0.00317568	NA	Fungal-specific protein of unknown function [Source:SGD%3BAcc:S000002141]	I	12046	12426	+	851233
6835	YPL222W	7413.58	-1.12677	0.193172	6.83666e-10	2.74425e-08	FMP40	Putative protein of unknown function%3B proposed to be involved in responding to environmental stresses%3B the authentic%2C non-tagged protein is detected in highly purified mitochondria in high-throughput studies [Source:SGD%3BAcc:S000006143]	XVI	130162	132228	+	855879
4213	YKL095W	1553	-1.1245	0.228062	1.00751e-07	2.4206e-06	YJU2	Essential protein required for pre-mRNA splicing%3B associates transiently with the spliceosomal NTC (	XI	262277	263113	+	853767
4143	YKL029C	5271.93	-1.11881	0.454182	0.00130203	0.00798811	MAE1	Mitochondrial malic enzyme%3B catalyzes the oxidative decarboxylation of malate to pyruvate%2C which is a key intermediate in sugar metabolism and a precursor for synthesis of several amino acids [Source:SGD%3BAcc:S000001512]	XI	382716	384725	-	853839
5495	YMR271C	5371.48	-1.11804	0.238014	3.19431e-07	6.73978e-06	URA10	Minor orotate phosphoribosyltransferase (OPRTase) isozyme%3B catalyzes the fifth enzymatic step in the de novo biosynthesis of pyrimidines%2C converting orotate into orotidine-5'-phosphate%3B URA10 has a paralog%2C URA5%2C that arose from the whole genom	XIII	806865	807548	-	855313
4102	YJR153W	844.457	-1.11609	0.293474	1.65458e-05	0.000200962	PGU1	Endo-polygalacturonase%3B pectolytic enzyme that hydrolyzes the alpha-1%2C4-glycosidic bonds in the rhamnogalacturonan chains in pectins [Source:SGD%3BAcc:S000003914]	X	722815	723900	+	853618
6136	YOL126C	34235.5	-1.11432	0.265351	3.18888e-06	4.85934e-05	MDH2	Cytoplasmic malate dehydrogenase%3B one of three isozymes that catalyze interconversion of malate and oxaloacetate%3B involved in the glyoxylate cycle and gluconeogenesis during growth on two-carbon compounds%3B interacts with Pck1p and Fbp1 [Source:SGD%	XV	81787	82920	-	853994
7048	YPR138C	5678.51	-1.11214	0.261527	2.54819e-06	4.01309e-05	MEP3	Ammonium permease of high capacity and low affinity%3B belongs to a ubiquitous family of cytoplasmic membrane proteins that transport only ammonium (NH4+)%3B expression is under the nitrogen catabolite repression regulation ammonia permease%3B MEP3 has a	XVI	810984	812453	-	856260
3445	YHR212W-A	50.0463	-1.11026	0.586608	0.00481762	0.0228654	NA	Pseudogenic fragment with similarity to flocculins%3B identified by gene-trapping%2C microarray-based expression analysis%2C and genome-wide homology searching%3B SWAT-GFP%2C seamless-GFP and mCherry fusion proteins localize to the endoplasmic reticulum%	VIII	538742	538945	+	1466531
6908	YPR005C	1148.68	-1.10699	0.154828	1.16138e-13	1.15838e-11	HAL1	Cytoplasmic protein involved in halotolerance%3B decreases intracellular Na+ (via Ena1p) and increases intracellular K+ by decreasing efflux%3B expression repressed by Ssn6p-Tup1p and Sko1p and induced by NaCl%2C KCl%2C and sorbitol through Gcn4p [Source	XVI	565787	566671	-	856113
4023	YJR078W	397.002	-1.10633	0.251826	1.37959e-06	2.37171e-05	BNA2	Tryptophan 2%2C3-dioxygenase or indoleamine 2%2C3-dioxygenase%3B required for de novo biosynthesis of NAD from tryptophan via kynurenine%3B interacts genetically with telomere capping gene CDC13%3B regulated by Hst1p and Aftp [Source:SGD%3BAcc:S000003839	X	578860	580221	+	853541
563	YAR061W	156.117	-1.10479	0.427746	0.000974182	0.00625053	NA	NA	NA	NA	NA	NA	851292
1923	YDR402C	218.831	-1.09638	0.304567	3.74829e-05	0.000401873	DIT2	N-formyltyrosine oxidase%3B sporulation-specific microsomal enzyme involved in the production of N%2CN-bisformyl dityrosine required for spore wall maturation%2C homologous to cytochrome P-450s%3B SWAT-GFP and mCherry fusion proteins localize to the endo	IV	1272234	1273703	-	852011
2028	YDR505C	6101.94	-1.09193	0.162808	2.69117e-12	1.88468e-10	PSP1	Asn and gln rich protein of unknown function%3B high-copy suppressor of POL1 (DNA polymerase alpha) and partial suppressor of CDC2 (polymerase delta) and CDC6 (pre-RC loading factor) mutations%3B overexpression results in growth inhibition%3B PSP1 has a	IV	1456695	1459220	-	852116
145	snR82	524.547	-1.09157	0.365264	0.000304032	0.00236334	NA	NA	NA	NA	NA	NA	9164893
4365	YKR015C	1288.58	-1.09155	0.28201	1.30349e-05	0.000166619	NA	Putative protein of unknown function [Source:SGD%3BAcc:S000001723]	XI	466961	468667	-	853885
6787	YPL177C	8816.48	-1.08796	0.213948	4.76864e-08	1.24079e-06	CUP9	Homeodomain-containing transcriptional repressor%3B regulates expression of PTR2%2C which encodes a major peptide transporter%3B imported peptides activate ubiquitin-dependent proteolysis%2C resulting in degradation of Cup9p and de-repression of PTR2 tra	XVI	213042	213962	-	855926
3691	YIR028W	544.758	-1.0861	0.260923	3.88789e-06	5.75145e-05	DAL4	Allantoin permease%3B expression sensitive to nitrogen catabolite repression and induced by allophanate%2C an intermediate in allantoin degradation [Source:SGD%3BAcc:S000001467]	IX	408468	410375	+	854846
5769	YNL196C	539.392	-1.08458	0.237293	6.17994e-07	1.19304e-05	SLZ1	Sporulation-specific protein with a leucine zipper motif%3B subunit of the MIS complex which controls mRNA methylation during during the induction of sporulation [Source:SGD%3BAcc:S000005140]	XIV	270275	271171	-	855525
5409	YMR191W	9373.17	-1.07809	0.332106	0.000133826	0.00118252	SPG5	Protein required for proteasome assembly during quiescence%3B binds to base of the proteasome regulartory particle%3B required for survival at high temperature during stationary phase%3B not required for growth on nonfermentable carbon sources [Source:SG	XIII	645656	646777	+	855229
5260	YMR056C	5095.84	-1.07746	0.224206	1.99874e-07	4.4302e-06	AAC1	Mitochondrial inner membrane ADP/ATP translocator%3B exchanges cytosolic ADP for mitochondrially synthesized ATP%3B phosphorylated%3B Aac1p is a minor isoform while Pet9p is the major ADP/ATP translocator%3B relocalizes from mitochondrion to cytoplasm up	XIII	387315	388244	-	855078
1121	YCR014C	1739.51	-1.06871	0.124045	9.91954e-19	1.9788e-16	POL4	DNA polymerase IV%3B undergoes pair-wise interactions with Dnl4p-Lif1p and Rad27p to mediate repair of DNA double-strand breaks by non-homologous end joining (NHEJ)%3B homologous to mammalian DNA polymerase beta [Source:SGD%3BAcc:S000000607]	III	139185	140933	-	850372
1283	YDL059C	490.497	-1.06841	0.278597	1.68445e-05	0.00020309	RAD59	Protein involved DNA double-strand break repair%3B repairs breaks in DNA during vegetative growth via recombination and single-strand annealing%3B anneals complementary single-stranded DNA%3B forms nuclear foci upon DNA replication stress%3B required for	IV	344237	344953	-	851500
6545	YOR342C	5142.25	-1.0671	0.331591	0.00015097	0.00130543	NA	Protein of unknown function%3B green fluorescent protein (GFP)-fusion protein localizes to the cytoplasm and the nucleus%3B relocalizes from nucleus to cytoplasm upon DNA replication stress%3B YOR342C has a paralog%2C YAL037W%2C that arose from the whole	XV	966666	967625	-	854520
1192	YCR082W	5846.59	-1.06684	0.136318	7.16954e-16	9.43942e-14	AHC2	Component of the ADA histone acetyltransferase complex%3B Ahc2p and Ahc1p are unique to the ADA complex and not shared with the related SAGA and SLIK complexes%3B may tether Ahc1p to the complex [Source:SGD%3BAcc:S000000678]	III	258883	259269	+	850443
6879	YPL262W	33186.3	-1.06393	0.407437	0.000946964	0.00611163	FUM1	Fumarase%3B converts fumaric acid to L-malic acid in the TCA cycle%3B cytosolic and mitochondrial distribution determined by the N-terminal targeting sequence%2C protein conformation%2C and status of glyoxylate shunt%3B phosphorylated in mitochondria [So	XVI	47336	48802	+	855866
5342	YMR133W	2290.57	-1.0631	0.407626	0.000952095	0.00613873	REC114	Protein involved in early stages of meiotic recombination%3B possibly involved in the coordination of recombination and meiotic division%3B mutations lead to premature initiation of the first meiotic division [Source:SGD%3BAcc:S000004740]	XIII	536207	537609	+	855163
4645	YLR111W	92.8659	-1.06301	0.43081	0.00139813	0.00848285	NA	Putative protein of unknown function%3B conserved across S. cerevisiae strains [Source:SGD%3BAcc:S000004101]	XII	370391	370723	+	850801
5379	YMR165C	5458.26	-1.0628	0.219408	1.69264e-07	3.82909e-06	PAH1	Mg2+-dependent phosphatidate (PA) phosphatase%3B dephosphorylates PA to yield diacylglycerol%3B regulates phospholipid synthesis%2C nuclear/ER membrane growth%2C lipid droplet formation%2C triacylglycerol synthesis%2C vacuolar homeostasis and cell wall i	XIII	590040	592628	-	855201
4229	YKL107W	1865.98	-1.06236	0.430068	0.00137261	0.00835882	NA	Putative short-chain dehydrogenase/reductase%3B proposed to be a palmitoylated membrane protein [Source:SGD%3BAcc:S000001590]	XI	236141	237070	+	853753
7031	YPR124W	17599.1	-1.06086	0.442601	0.00165798	0.00971038	CTR1	High-affinity copper transporter of plasma membrane%3B mediates nearly all copper uptake under low copper conditions%3B transcriptionally induced at low copper levels and degraded at high copper levels%3B protein increases in abundance and relocalizes fr	XVI	786208	787428	+	856241
5812	YNL239W	8299.37	-1.05978	0.173421	1.38201e-10	6.94487e-09	LAP3	Cysteine aminopeptidase with homocysteine-thiolactonase activity%3B protects cells against homocysteine toxicity%3B has bleomycin hydrolase activity in vitro%3B transcription is regulated by galactose via Gal4p%3B orthologous to human BLMH [Source:SGD%3B	XIV	200569	201933	+	855482
1414	YDL182W	9022.54	-1.05774	0.62341	0.00695479	0.0301802	LYS20	Homocitrate synthase isozyme and functions in DNA repair%3B catalyzes the condensation of acetyl-CoA and alpha-ketoglutarate to form homocitrate%2C which is the first step in the lysine biosynthesis pathway%3B LYS20 has a paralog%2C LYS21%2C that arose f	IV	133437	134723	+	851346
4702	YLR157C	767.645	-1.05304	0.188717	3.34619e-09	1.13546e-07	ASP3-2	Cell-wall L-asparaginase II involved in asparagine catabolism%3B expression induced during nitrogen starvation%3B ORF contains a short non-coding RNA that enhances expression of full-length gene%3B likely arose in via horizontal gene transfer from the wi	XII	472969	474057	-	850852
967	YBR239C	1719.52	-1.05301	0.249419	3.1759e-06	4.85081e-05	ERT1	Transcriptional regulator%3B involved in regulation of gluconeogenesis and fermentable carbon utilization%3B GFP-fusion protein localizes to cytoplasm%2C nucleus%3B null mutation affects periodicity of transcriptional and metabolic oscillation%3B plays r	II	698354	699943	-	852541
7056	YPR145W	20754.4	-1.05078	0.487577	0.0029765	0.0155634	ASN1	Asparagine synthetase%3B catalyzes the synthesis of L-asparagine from L-aspartate in the asparagine biosynthetic pathway%3B ASN1 has a paralog%2C ASN2%2C that arose from the whole genome duplication [Source:SGD%3BAcc:S000006349]	XVI	822620	824338	+	856268
4484	YLL022C	2045.33	-1.0499	0.29579	4.81363e-05	0.000499812	HIF1	Non-essential component of the HAT-B histone acetyltransferase complex%3B localized to the nucleus%3B has a role in telomeric silencing%3B other members are Hat1p and Hat2p [Source:SGD%3BAcc:S000003945]	XII	99044	100201	-	850638
1098	YCL064C	64388.9	-1.04832	0.308507	8.3285e-05	0.000801558	CHA1	Catabolic L-serine (L-threonine) deaminase%3B catalyzes the degradation of both L-serine and L-threonine%3B required to use serine or threonine as the sole nitrogen source%2C transcriptionally induced by serine and threonine [Source:SGD%3BAcc:S000000569]	III	15798	16880	-	850295
2144	YEL059C-A	605.228	-1.04448	0.252651	4.67992e-06	6.75612e-05	SOM1	Subunit of the mitochondrial inner membrane peptidase (IMP)%3B IMP is required for maturation of mitochondrial proteins of the intermembrane space%3B Som1p facilitates cleavage of a subset of substrates%3B contains twin cysteine-x9-cysteine motifs [Sourc	V	42400	42624	-	856650
1089	YCL055W	3145.44	-1.0435	0.24042	1.90623e-06	3.12157e-05	KAR4	Transcription factor required for response to pheromones%3B also required during meiosis%3B exists in two forms%2C a slower-migrating form more abundant during vegetative growth and a faster-migrating form induced by pheromone [Source:SGD%3BAcc:S00000056	III	27929	28936	+	850303
2129	YEL046C	19125.5	-1.04196	0.309473	9.44412e-05	0.000889423	GLY1	Threonine aldolase%3B catalyzes the cleavage of L-allo-threonine and L-threonine to glycine%3B involved in glycine biosynthesis [Source:SGD%3BAcc:S000000772]	V	67629	68792	-	856665
2602	YGL055W	44182	-1.03706	1.2423	0.0143619	0.0535664	OLE1	Delta(9) fatty acid desaturase%3B required for monounsaturated fatty acid synthesis and for normal distribution of mitochondria [Source:SGD%3BAcc:S000003023]	VII	398628	400160	+	852825
2882	YGR060W	20746.9	-1.03616	0.172684	2.87401e-10	1.3048e-08	ERG25	C-4 methyl sterol oxidase%3B catalyzes the first of three steps required to remove two C-4 methyl groups from an intermediate in ergosterol biosynthesis%3B mutants accumulate the sterol intermediate 4%2C4-dimethylzymosterol%3B human MSMO1 functionally co	VII	610564	611493	+	852951
6242	YOR058C	2455.91	-1.03578	0.149684	6.658e-13	5.09647e-11	ASE1	Mitotic spindle midzone-localized microtubule bundling protein%3B microtubule-associated protein (MAP) family member%3B required for spindle elongation and stabilization%3B undergoes cell cycle-regulated degradation by anaphase promoting complex%3B poten	XV	433688	436345	-	854223
6372	YOR180C	1798.92	-1.03563	0.237751	1.79437e-06	2.9754e-05	DCI1	Peroxisomal protein%3B identification as a delta(3%2C5)-delta(2%2C4)-dienoyl-CoA isomerase involved in fatty acid metabolism is disputed%3B DCI1 has a paralog%2C ECI1%2C that arose from the whole genome duplication [Source:SGD%3BAcc:S000005706]	XV	674352	675167	-	854352
4106	YJR157W	75.4331	-1.03212	0.560016	0.00565629	0.0259661	NA	Dubious open reading frame%3B unlikely to encode a functional protein%2C based on available experimental and comparative sequence data [Source:SGD%3BAcc:S000003918]	X	730515	730877	+	NA
3152	YHL012W	1670.92	-1.03186	0.512754	0.00413488	0.0203437	NA	Putative UTP glucose-1-phosphate uridylyltransferase%3B YHL012W has a paralog%2C UGP1%2C that arose from the whole genome duplication [Source:SGD%3BAcc:S000001004]	VIII	78936	80417	+	856374
2360	YER158C	2755.54	-1.02957	0.318454	0.000151107	0.00130543	NA	Protein of unknown function%3B potentially phosphorylated by Cdc28p%3B YER158C has a paralog%2C AFR1%2C that arose from the whole genome duplication [Source:SGD%3BAcc:S000000960]	V	488857	490578	-	856903
3364	YHR140W	1818.66	-1.02788	0.407131	0.00125588	0.00775561	NA	Putative integral membrane protein of unknown function [Source:SGD%3BAcc:S000001182]	VIII	380572	381291	+	856543
2265	YER079W	6907.55	-1.02394	0.281087	3.50608e-05	0.000380866	NA	Putative protein of unknown function [Source:SGD%3BAcc:S000000881]	V	318920	319552	+	856812
5910	YNL334C	415.48	-1.0238	0.22984	1.17386e-06	2.08289e-05	SNO2	Protein of unknown function%3B nearly identical to Sno3p%3B expression is induced before the diauxic shift and also in the absence of thiamin [Source:SGD%3BAcc:S000005278]	XIV	12208	12876	-	855382
4946	YLR376C	829.631	-1.02292	0.224309	7.18343e-07	1.35497e-05	PSY3	Component of Shu complex (aka PCSS complex)%3B Shu complex also includes Shu1%2C Csm2%2C Shu2%2C and promotes error-free DNA repair%3B promotes Rad51p filament assembly%3B Shu complex mediates inhibition of Srs2p function%3B Psy3p and Csm2p contain simil	XII	872826	873554	-	851091
2867	YGR045C	99.2521	-1.0219	0.472648	0.00307775	0.0160165	NA	Putative protein of unknown function%3B conserved across S. cerevisiae strains [Source:SGD%3BAcc:S000003277]	VII	583934	584296	-	852936
2063	YDR535C	271.003	-1.02121	0.305318	0.000113015	0.00102195	NA	Dubious open reading frame%3B unlikely to encode a functional protein%2C based on available experimental and comparative sequence data%3B YDR535C is not an essential gene [Source:SGD%3BAcc:S000002943]	IV	1506606	1507362	-	NA
3156	YHL015W-A	128.41	-1.02048	0.39942	0.00122593	0.00763508	NA	Putative protein of unknown function [Source:SGD%3BAcc:S000028828]	VIII	74699	74782	+	1466525
6201	YOR019W	4870.22	-1.01945	0.305563	0.000107849	0.000986067	NA	Protein of unknown function%3B may interact with ribosomes%2C based on co-purification experiments%3B YOR019W has a paralog%2C JIP4%2C that arose from the whole genome duplication [Source:SGD%3BAcc:S000005545]	XV	368127	370319	+	854184
6281	YOR095C	5790.99	-1.01758	1.09147	0.0148374	0.0548547	RKI1	Ribose-5-phosphate ketol-isomerase%3B catalyzes the interconversion of ribose 5-phosphate and ribulose 5-phosphate in the pentose phosphate pathway%3B participates in pyridoxine biosynthesis [Source:SGD%3BAcc:S000005621]	XV	503552	504328	-	854262
3947	YJR004C	31480.7	-1.01652	0.629583	0.00850802	0.0354704	SAG1	Alpha-agglutinin of alpha-cells%3B binds to Aga1p during agglutination%2C N-terminal half is homologous to the immunoglobulin superfamily and contains binding site for a-agglutinin%2C C-terminal half is highly glycosylated and contains GPI anchor [Source	X	442909	444861	-	853460
2088	YEL012W	9722.07	-1.01601	0.26197	1.41544e-05	0.000178503	UBC8	Ubiquitin-conjugating enzyme that regulates gluconeogenesis%3B negatively regulates gluconeogenesis by mediating the glucose-induced ubiquitination of fructose-1%2C6-bisphosphatase (FBPase)%3B cytoplasmic enzyme that catalyzes the ubiquitination of histo	V	131772	132551	+	856704
2030	YDR507C	3332.18	-1.0139	0.458476	0.00280205	0.0148757	GIN4	Protein kinase involved in bud growth and assembly of the septin ring%3B proposed to have kinase-dependent and kinase-independent activities%3B undergoes autophosphorylation%3B similar to Hsl1p%3B GIN4 has a paralog%2C KCC4%2C that arose from the whole g	IV	1462358	1465786	-	852119
591	YBL016W	4795.13	-1.01342	0.240733	3.56905e-06	5.36417e-05	FUS3	Mitogen-activated serine/threonine protein kinase involved in mating%3B phosphoactivated by Ste7p%3B substrates include Ste12p%2C Far1p%2C Bni1p%2C Sst2p%3B inhibits invasive growth during mating by phosphorylating Tec1p%2C promoting its%3B inhibits recr	II	192451	193512	+	852265
4699	YLR155C	2061.25	-1.01306	0.207304	1.47751e-07	3.40086e-06	ASP3-1	Cell-wall L-asparaginase II involved in asparagine catabolism%3B expression induced during nitrogen starvation%3B ORF contains a short non-coding RNA that enhances expression of full-length gene%3B likely arose in via horizontal gene transfer from the wi	XII	469317	470405	-	850850
1063	YCL030C	8826.56	-1.00774	0.372511	0.000809207	0.00536997	HIS4	Multifunctional enzyme containing phosphoribosyl-ATP pyrophosphatase%3B phosphoribosyl-AMP cyclohydrolase%2C and histidinol dehydrogenase activities%3B catalyzes the second%2C third%2C ninth and tenth steps in histidine biosynthesis [Source:SGD%3BAcc:S00	III	65934	68333	-	850327
6781	YPL171C	1246.47	-1.0036	0.494315	0.0041261	0.0203157	OYE3	Conserved NADPH oxidoreductase containing flavin mononucleotide (FMN)%3B homologous to Oye2p with different ligand binding and catalytic properties%3B has potential roles in oxidative stress response and programmed cell death [Source:SGD%3BAcc:S000006092	XVI	226169	227371	-	855932
3692	YIR029W	1145.15	-1.00327	0.299069	0.000104154	0.000957604	DAL2	Allantoicase%3B converts allantoate to urea and ureidoglycolate in the second step of allantoin degradation%3B expression sensitive to nitrogen catabolite repression and induced by allophanate%2C an intermediate in allantoin degradation [Source:SGD%3BAcc	IX	410807	411838	+	854847
4522	YLL060C	1427.98	-1.00142	0.172565	9.83013e-10	3.74056e-08	GTT2	Glutathione S-transferase capable of homodimerization%3B functional overlap with Gtt2p%2C Grx1p%2C and Grx2p%3B protein abundance increases in response to DNA replication stress [Source:SGD%3BAcc:S000003983]	XII	21138	21839	-	850666
2429	YFL021W	1236.27	-1.00119	0.374269	0.000885919	0.00579722	GAT1	Transcriptional activator of nitrogen catabolite repression genes%3B contains a GATA-1-type zinc finger DNA-binding motif%3B activity and localization regulated by nitrogen limitation and Ure2p%3B different translational starts produce two major and two	VI	95966	97498	+	850523
5821	YNL248C	9161.22	1.00063	0.824724	0.0131968	0.0503037	RPA49	RNA polymerase I subunit A49%3B essential for nucleolar assembly and for high polymerase loading rate%3B required for nucleolar localization of Rpa34p [Source:SGD%3BAcc:S000005192]	XIV	181361	182608	-	855473
6001	YOL002C	4530.8	1.00194	0.36463	0.000707846	0.00477433	IZH2	Plasma membrane receptor for plant antifungal osmotin%3B involved in zinc ion homeostasis%2C apoptosis%3B negatively regulates ZRT1 and other functionally divergent genes through CCCTC promoter motif (IzRE)%3B modulates FET3 activity in iron-independent	XV	323411	324364	-	854160
4879	YLR314C	9728.53	1.00227	0.264228	2.00839e-05	0.000235198	CDC3	Component of the septin ring that is required for cytokinesis%3B septins are GTP-binding proteins that assemble with other septins into rod-like complexes that can associate with other rods to form filament polymers%3B septin rings at the mother-bud neck	XII	762575	764137	-	851024
6975	YPR069C	7401.12	1.00381	0.220045	7.20615e-07	1.35537e-05	SPE3	Spermidine synthase%3B involved in biosynthesis of spermidine and also in biosynthesis of pantothenic acid%3B spermidine is required for growth of wild-type cells [Source:SGD%3BAcc:S000006273]	XVI	684556	685437	-	856182
2413	YFL010W-A	88.3382	1.00611	0.450806	0.00265143	0.0142718	AUA1	Protein required for the negative regulation by ammonia of Gap1p%3B Gap1p is a general amino acid permease [Source:SGD%3BAcc:S000001955]	VI	114990	115274	+	850537
1238	YDL016C	537.189	1.00809	0.304554	0.000118468	0.0010625	NA	Dubious open reading frame%3B unlikely to encode a functional protein%2C based on available experimental and comparative sequence data%3B partially overlaps the verified ORF CDC7/YDL153C%2C the catalytic subunit of a complex that regulates DNA replicatio	IV	425570	425872	-	NA
3594	YIL118W	4954.52	1.01152	0.169006	3.185e-10	1.42632e-08	RHO3	Non-essential small GTPase of the Rho/Rac family of Ras-like proteins%3B involved in the establishment of cell polarity%3B GTPase activity positively regulated by the GTPase activating protein (GAP) Rgd1p [Source:SGD%3BAcc:S000001380]	IX	139752	140447	+	854688
4199	YKL081W	25750.3	1.01203	0.253178	8.65145e-06	0.000116946	TEF4	Gamma subunit of translational elongation factor eEF1B%3B stimulates the binding of aminoacyl-tRNA (AA-tRNA) to ribosomes by releasing eEF1A (Tef1p/Tef2p) from the ribosomal complex [Source:SGD%3BAcc:S000001564]	XI	282891	284455	+	853781
5444	YMR223W	1877.07	1.01409	0.148287	1.19884e-12	8.96814e-11	UBP8	Ubiquitin-specific protease component of the SAGA acetylation complex%3B required for SAGA (Spt-Ada-Gcn5-Acetyltransferase)-mediated deubiquitination of histone H2B [Source:SGD%3BAcc:S000004836]	XIII	716715	718130	+	855263
2739	YGL189C	46778.4	1.01591	0.314544	0.000153795	0.00132121	RPS26A	Protein component of the small (40S) ribosomal subunit%3B homologous to mammalian ribosomal protein S26%2C no bacterial homolog%3B RPS26A has a paralog%2C RPS26B%2C that arose from the whole genome duplication%3B human homolog can partially complement an	VII	148229	148588	-	852686
3101	YGR264C	12185.4	1.01628	0.252804	7.82442e-06	0.000106863	MES1	Methionyl-tRNA synthetase%3B forms a complex with glutamyl-tRNA synthetase (Gus1p) and Arc1p%2C which increases the catalytic efficiency of both tRNA synthetases%3B also has a role in nuclear export of tRNAs%3B mutations in human ortholog MARS are associ	VII	1019598	1021853	-	853181
6048	YOL045W	3750.05	1.02594	0.327298	0.00020736	0.00170631	PSK2	PAS-domain containing serine/threonine protein kinase%3B regulates sugar flux and translation in response to an unknown metabolite by phosphorylating Ugp1p and Gsy2p (sugar flux) and Caf20p%2C Tif11p and Sro9p (translation)%3B PSK2 has a paralog%2C PSK1%	XV	243497	246802	+	854111
5630	YNL067W	18830.9	1.02993	0.345879	0.00033944	0.00259226	RPL9B	Ribosomal 60S subunit protein L9B%3B homologous to mammalian ribosomal protein L9 and bacterial L6%3B RPL9B has a paralog%2C RPL9A%2C that arose from a single-locus duplication [Source:SGD%3BAcc:S000005011]	XIV	499681	500256	+	855658
521	YAL060W	37618.7	1.03124	0.555593	0.00547861	0.0252792	BDH1	NAD-dependent (R%2CR)-butanediol dehydrogenase%3B catalyzes oxidation of (R%2CR)-2%2C3-butanediol to (3R)-acetoin%2C oxidation of meso-butanediol to (3S)-acetoin%2C and reduction of acetoin%3B enhances use of 2%2C3-butanediol as an aerobic carbon source	I	35155	36303	+	851239
5413	YMR194C-A	184.887	1.03261	0.314705	0.00012639	0.00112436	NA	Dubious open reading frame%3B unlikely to encode a functional protein%2C based on available experimental and comparative sequence data [Source:SGD%3BAcc:S000007250]	XIII	652912	653136	-	NA
1968	YDR446W	91.5354	1.03971	0.668043	0.00877346	0.0362724	ECM11	Meiosis-specific protein%3B component of the Synaptonemal Complex (SC) along with Gmc2p%3B required for efficient crossover formation and for the efficient loading of the SC transverse filament protein%2C Zip1p%3B is SUMOlytaed in a Gmc2p manner%2C and S	IV	1353725	1354633	+	852057
2943	YGR118W	34914.7	1.04842	0.250418	3.64638e-06	5.44311e-05	RPS23A	Ribosomal protein 28 (rp28) of the small (40S) ribosomal subunit%3B required for translational accuracy%3B homologous to mammalian ribosomal protein S23 and bacterial S12%3B RPS23A has a paralog%2C RPS23B%2C that arose from the whole genome duplication%3	VII	726974	727730	+	853015
520	YAL059W	1371.66	1.04974	0.368803	0.000493768	0.00355632	ECM1	Pre-ribosomal factor involved in 60S ribosomal protein subunit export%3B associates with the pre-60S particle%3B shuttles between the nucleus and cytoplasm [Source:SGD%3BAcc:S000000055]	I	36509	37147	+	851240
5007	YLR432W	14810.9	1.05736	0.352478	0.000304079	0.00236334	IMD3	Inosine monophosphate dehydrogenase%3B catalyzes the rate-limiting step in the de novo synthesis of GTP%3B member of a four-gene family in S. cerevisiae%2C constitutively expressed%3B IMD3 has a paralog%2C IMD4%2C that arose from the whole genome duplica	XII	1002557	1004128	+	851152
5661	YNL096C	11026.9	1.05818	0.210113	6.31999e-08	1.59404e-06	RPS7B	Protein component of the small (40S) ribosomal subunit%3B interacts with Kti11p%3B deletion causes hypersensitivity to zymocin%3B homologous to mammalian ribosomal protein S7%2C no bacterial homolog%3B RPS7B has a paralog%2C RPS7A%2C that arose from the	XIV	443398	444315	-	855628
5464	YMR242C	31728.4	1.05868	0.481813	0.00260085	0.0140455	RPL20A	Ribosomal 60S subunit protein L20A%3B homologous to mammalian ribosomal protein L18A%2C no bacterial homolog%3B RPL20A has a paralog%2C RPL20B%2C that arose from the whole genome duplication [Source:SGD%3BAcc:S000004855]	XIII	753225	753742	-	855283
4750	YLR197W	16760	1.05878	0.696151	0.00861896	0.0357973	NOP56	Essential evolutionarily-conserved nucleolar protein%3B component of the box C/D snoRNP complexes that direct 2'-O-methylation of pre-rRNA during its maturation%3B overexpression causes spindle orientation defects [Source:SGD%3BAcc:S000004187]	XII	546097	547611	+	850894
6487	YOR291W	3386.49	1.06423	0.295933	3.88519e-05	0.000413185	YPK9	Vacuolar protein with a possible role in sequestering heavy metals%3B has similarity to the type V P-type ATPase Spf1p%3B homolog of human ATP13A2 (PARK9)%2C mutations in which are associated with Parkinson disease and Kufor-Rakeb syndrome [Source:SGD%3B	XV	861175	865593	+	854466
2958	YGR131W	386.926	1.07066	0.3154	8.03936e-05	0.000779383	FHN1	Protein of unknown function%3B induced by ketoconazole%3B promoter region contains sterol regulatory element motif%2C which has been identified as a Upc2p-binding site%3B overexpression complements function of Nce102p in NCE102 deletion strain%3B FHN1 ha	VII	754726	755250	+	853032
5524	YMR296C	5885.31	1.07849	0.15091	1.22046e-13	1.18151e-11	LCB1	Component of serine palmitoyltransferase%3B responsible along with Lcb2p for the first committed step in sphingolipid synthesis%2C which is the condensation of serine with palmitoyl-CoA to form 3-ketosphinganine [Source:SGD%3BAcc:S000004911]	XIII	859215	860891	-	855342
2515	YFR032C-B	291.8	1.07916	0.400965	0.000749143	0.00501689	NA	Putative protein of unknown function%3B identified by gene-trapping%2C microarray-based expression analysis%2C and genome-wide homology searching [Source:SGD%3BAcc:S000028630]	VI	223710	223973	-	1466402
5552	YMR318C	9639.21	1.08371	0.24531	1.23768e-06	2.18436e-05	ADH6	NADPH-dependent medium chain alcohol dehydrogenase%3B has broad substrate specificity%3B member of the cinnamyl family of alcohol dehydrogenases%3B may be involved in fusel alcohol synthesis or in aldehyde tolerance%3B protein abundance increases in resp	XIII	911061	912143	-	855368
3673	YIR016W	4667.12	1.08441	0.332481	0.000124542	0.00111092	NA	Putative protein of unknown function%3B expression directly regulated by the metabolic and meiotic transcriptional regulator Ume6p%3B overexpression causes a cell cycle delay or arrest%3B non-essential gene%3B YIR016W has a paralog%2C YOL036W%2C that aro	IX	382628	383425	+	854833
456	YAL005C	156993	1.08451	0.81099	0.0102206	0.0408513	SSA1	ATPase involved in protein folding and NLS-directed nuclear transport%3B member of HSP70 family%3B required for ubiquitin-dependent degradation of short-lived proteins%3B forms chaperone complex with Ydj1p%3B localized to nucleus%2C cytoplasm%2C cell wal	I	139503	141431	-	851259
1346	YDL119C	764.379	1.08847	0.302517	3.71169e-05	0.00039925	HEM25	Mitochondrial glycine transporter%3B required for the transport of glycine into mitochondria for initiation of heme biosynthesis%2C with YMC1 acting as a secondary transporter%3B homolog of human SLC25A38%2C a mitochondrial glycine transporter associated	IV	246689	247612	-	851439
7008	YPR102C	33617.9	1.09055	0.3322	0.00011401	0.00102953	RPL11A	Ribosomal 60S subunit protein L11A%3B expressed at twice the level of Rpl11Bp%3B involved in ribosomal assembly%3B depletion causes degradation of 60S proteins and RNA%3B homologous to mammalian ribosomal protein L11 and bacterial L5%3B RPL11A has a para	XVI	731224	731748	-	856217
2881	YGR059W	244.826	1.09485	0.482792	0.00211614	0.0117756	SPR3	Sporulation-specific homolog of the CDC3/10/11/12 family of genes%3B septin protein involved in sporulation%3B regulated by ABFI%3B the yeast CDC3/10/11/12 family is a family of bud neck microfilament genes [Source:SGD%3BAcc:S000003291]	VII	607563	609101	+	852950
906	YBR187W	6350.96	1.10139	0.2111	2.28689e-08	6.32546e-07	GDT1	Calcium transporter localized to the cis- and medial-Golgi apparatus%3B required for protein glycosylation%3B GFP-fusion protein localizes to the vacuole%3B TMEM165%2C a human gene which causes Congenital Disorders of Glycosylation is orthologous and fun	II	602634	603476	+	852485
2645	YGL097W	6055.83	1.10554	0.27179	5.5992e-06	7.90977e-05	SRM1	Nucleotide exchange factor for Gsp1p%3B localizes to the nucleus%2C required for nucleocytoplasmic trafficking of macromolecules%3B suppressor of the pheromone response pathway%3B potentially phosphorylated by Cdc28p%3B human homolog of the RAN GEF%2C RC	VII	321782	323230	+	852782
1496	YDR012W	33265.2	1.10799	0.402758	0.000588978	0.0041116	RPL4B	Ribosomal 60S subunit protein L4B%3B homologous to mammalian ribosomal protein L4 and bacterial L4%3B RPL4B has a paralog%2C RPL4A%2C that arose from the whole genome duplication [Source:SGD%3BAcc:S000002419]	IV	471853	472941	+	851575
5025	YLR448W	11761.3	1.10897	0.458332	0.00142936	0.00863254	RPL6B	Ribosomal 60S subunit protein L6B%3B binds 5.8S rRNA%3B homologous to mammalian ribosomal protein L6%2C no bacterial homolog%3B RPL6B has a paralog%2C RPL6A%2C that arose from the whole genome duplication [Source:SGD%3BAcc:S000004440]	XII	1028854	1029768	+	851169
5634	YNL069C	45784.8	1.10906	0.358118	0.00020558	0.00169591	RPL16B	Ribosomal 60S subunit protein L16B%3B N-terminally acetylated%2C binds 5.8 S rRNA%3B transcriptionally regulated by Rap1p%3B homologous to mammalian ribosomal protein L13A and bacterial L13%3B RPL16B has a paralog%2C RPL16A%2C that arose from the whole g	XIV	493956	495001	-	855655
2443	YFL034C-A	3146.58	1.10978	0.399064	0.000543151	0.00383644	RPL22B	Ribosomal 60S subunit protein L22A%3B required for translation of long 5' UTR of IME1 mRNA and meiotic entry%3B homologous to mammalian ribosomal protein L22%2C no bacterial homolog%3B RPL22B has a paralog%2C RPL22A%2C that arose from the whole genome du	VI	64243	64932	-	850509
5567	YNL007C	39341.9	1.11202	0.319319	5.50176e-05	0.000561521	SIS1	Type II HSP40 co-chaperone that interacts with the HSP70 protein Ssa1p%3B shuttles between cytosol and nucleus%3B mediates delivery of misfolded proteins into the nucleus for degradation%3B involved in proteasomal degradation of misfolded cytosolic prote	XIV	618507	619565	-	855725
1357	YDL130W	40113.9	1.11627	0.422996	0.000792545	0.00527002	RPP1B	Ribosomal protein P1 beta%3B component of the ribosomal stalk%2C which is involved in interaction of translational elongation factors with ribosome%3B free (non-ribosomal) P1 stimulates the phosphorylation of the eIF2 alpha subunit (Sui2p) by Gcn2p%3B ac	IV	229906	230527	+	851427
106	snR48	48.1536	1.11826	0.529991	0.00287201	0.0151737	NA	NA	NA	NA	NA	NA	9164898
5734	YNL162W	26726.6	1.12189	0.390581	0.000405142	0.00301702	RPL42A	Ribosomal 60S subunit protein L42A%3B homologous to mammalian ribosomal protein L36A%2C no bacterial homolog%3B RPL42A has a paralog%2C RPL42B%2C that arose from the whole genome duplication [Source:SGD%3BAcc:S000005106]	XIV	331322	332154	+	855560
3252	YHR046C	1677.92	1.12629	0.353168	0.000149655	0.00129971	INM1	Inositol monophosphatase%3B involved in biosynthesis of inositol and in phosphoinositide second messenger signaling%3B INM1 expression increases in the presence of inositol and decreases upon exposure to antibipolar drugs lithium and valproate [Source:SG	VIII	197398	198285	-	856442
1143	YCR031C	40440	1.13611	0.33464	7.21448e-05	0.00070569	RPS14A	Protein component of the small (40S) ribosomal subunit%3B required for ribosome assembly and 20S pre-rRNA processing%3B mutations confer cryptopleurine resistance%3B homologous to mammalian ribosomal protein S14 and bacterial S11%3B RPS14A has a paralog%	III	177500	178220	-	850397
1119	YCR012W	145237	1.14042	0.424476	0.000673372	0.00459835	PGK1	3-phosphoglycerate kinase%3B catalyzes transfer of high-energy phosphoryl groups from the acyl phosphate of 1%2C3-bisphosphoglycerate to ADP to produce ATP%3B key enzyme in glycolysis and gluconeogenesis [Source:SGD%3BAcc:S000000605]	III	137746	138996	+	850370
5340	YMR131C	9586.58	1.14759	0.522878	0.00227773	0.0125686	RRB1	Specific chaperone for ribosomal protein Rpl3p%3B binds to nascent Rpl3p during translation%3B essential gene [Source:SGD%3BAcc:S000004738]	XIII	533163	534698	-	855161
6092	YOL086C	232571	1.14827	0.509507	0.00198376	0.0111807	ADH1	Alcohol dehydrogenase%3B fermentative isozyme active as homo- or heterotetramers%3B required for the reduction of acetaldehyde to ethanol%2C the last step in the glycolytic pathway%3B ADH1 has a paralog%2C ADH5%2C that arose from the whole genome duplica	XV	159548	160594	-	854068
1475	YDL241W	895.852	1.15031	0.327534	4.57024e-05	0.000476664	NA	Putative protein of unknown function%3B SWAT-GFP and mCherry fusion proteins localize to the endoplasmic reticulum%3B YDL241W is not an essential gene [Source:SGD%3BAcc:S000002400]	IV	20635	21006	+	851356
3903	YJL188C	643.701	1.15126	0.298093	1.36811e-05	0.000173532	BUD19	Dubious open reading frame%3B unlikely to encode a functional protein%2C based on available experimental and comparative sequence data%3B not conserved in closely related Saccharomyces species%3B 88%25 of ORF overlaps the verified gene RPL39%3B diploid m	X	76202	76510	-	NA
754	YBR051W	40.2894	1.1531	0.757642	0.00778866	0.0329958	NA	Dubious open reading frame%3B unlikely to encode a functional protein%2C based on available experimental and comparative sequence data%3B partially overlaps the REG2/YBR050C regulatory subunit of the Glc7p type-1 protein phosphatase [Source:SGD%3BAcc:S00	II	337988	338338	+	NA
3790	YJL080C	11048.4	1.15696	0.217011	1.14663e-08	3.38488e-07	SCP160	Essential RNA-binding G protein effector of mating response pathway%3B ligand-activated RNA-binding protein that delivers RNAs involved in polarization and perpetualizing mating signal to shmoo tip during pheromone signaling%3B Scp160p-mediated RNA traff	X	285558	289226	-	853365
5415	YMR194W	10646.6	1.16086	0.248062	3.27605e-07	6.84641e-06	RPL36A	Ribosomal 60S subunit protein L36A%3B N-terminally acetylated%3B binds to 5.8 S rRNA%3B homologous to mammalian ribosomal protein L36%2C no bacterial homolog%3B RPL36A has a paralog%2C RPL36B%2C that arose from the whole genome duplication [Source:SGD%3B	XIII	651145	651910	+	855232
2023	YDR500C	19989.1	1.16332	0.31512	2.33179e-05	0.000267892	RPL37B	Ribosomal 60S subunit protein L37B%3B required for processing of 27SB pre-rRNA and formation of stable 66S assembly intermediates%3B protein abundance increases in response to DNA replication stress%3B homologous to mammalian ribosomal protein L37%2C no	IV	1450198	1450853	-	852111
5012	YLR437C	1395.78	1.16511	0.262727	7.22863e-07	1.35573e-05	DIF1	Protein that regulates nuclear localization of Rnr2p and Rnr4p%3B phosphorylated by Dun1p in response to DNA damage and degraded%3B N-terminal half shows similarity to S. pombe Spd1 protein%3B DIF1 has a paralog%2C SML1%2C that arose from the whole genom	XII	1011622	1012023	-	851157
5388	YMR173W	2314.52	1.17148	0.433431	0.000619705	0.00430329	DDR48	DNA damage-responsive protein%3B expression is increased in response to heat-shock stress or treatments that produce DNA lesions%3B contains multiple repeats of the amino acid sequence NNNDSYGS%3B protein abundance increases in response to DNA replicatio	XIII	608689	609981	+	855210
4276	YKL152C	52745.5	1.18112	0.457078	0.000838413	0.00554454	GPM1	Tetrameric phosphoglycerate mutase%3B mediates the conversion of 3-phosphoglycerate to 2-phosphoglycerate during glycolysis and the reverse reaction during gluconeogenesis [Source:SGD%3BAcc:S000001635]	XI	163642	164385	-	853705
3388	YHR163W	4009.89	1.18648	0.281229	2.6166e-06	4.09146e-05	SOL3	6-phosphogluconolactonase%3B catalyzes the second step of the pentose phosphate pathway%3B weak multicopy suppressor of los1-1 mutation%3B homologous to Sol2p and Sol1p%3B SOL3 has a paralog%2C SOL4%2C that arose from the whole genome duplication [Source	VIII	423724	424473	+	856568
5075	YML024W	23777.8	1.19165	0.31856	1.86279e-05	0.00022135	RPS17A	Ribosomal protein 51 (rp51) of the small (40s) subunit%3B homologous to mammalian ribosomal protein S17%2C no bacterial homolog%3B RPS17A has a paralog%2C RPS17B%2C that arose from the whole genome duplication [Source:SGD%3BAcc:S000004486]	XIII	225889	226697	+	854984
3439	YHR207C	3469.48	1.19207	0.201024	3.48254e-10	1.52837e-08	SET5	Methyltransferase involved in methylation of histone H4 Lys5%2C -8%2C -12%3B S-adenosylmethionine-dependent%3B zinc-finger protein%2C contains one canonical and two unusual fingers in unusual arrangements%3B deletion enhances replication of positive-stra	VIII	514905	516485	-	856614
7039	YPR132W	37364	1.1953	0.381131	0.000160232	0.00136988	RPS23B	Ribosomal protein 28 (rp28) of the small (40S) ribosomal subunit%3B required for translational accuracy%3B homologous to mammalian ribosomal protein S23 and bacterial S12%3B RPS23B has a paralog%2C RPS23A%2C that arose from the whole genome duplication%3	XVI	794965	795767	+	856250
3283	YHR070C-A	157.377	1.20044	0.379631	0.000148373	0.00129369	NA	Dubious open reading frame%3B unlikely to encode a functional protein%2C based on available experimental and comparative sequence data%3B overlaps the verified gene TRM5/YHR070W [Source:SGD%3BAcc:S000028780]	VIII	236102	236512	-	NA
6495	YOR298C-A	36217.1	1.20297	0.382218	0.000153937	0.00132121	MBF1	Transcriptional coactivator%3B bridges the DNA-binding region of Gcn4p and TATA-binding protein Spt15p%3B suppressor of frameshift mutations%3B protein abundance increases in response to DNA replication stress [Source:SGD%3BAcc:S000007253]	XV	877230	877685	-	854474
649	YBL069W	783.368	1.20575	0.273566	1.11503e-06	1.98385e-05	AST1	Lipid raft associated protein%3B interacts with the plasma membrane ATPase Pma1p and has a role in its targeting to the plasma membrane by influencing its incorporation into lipid rafts%3B sometimes classified in the medium-chain dehydrogenase/reductases	II	90741	92030	+	852209
1510	YDR025W	27736.4	1.21043	0.585038	0.00271306	0.0145073	RPS11A	Protein component of the small (40S) ribosomal subunit%3B homologous to mammalian ribosomal protein S11 and bacterial S17%3B N-terminally propionylated in vivo%3B RPS11A has a paralog%2C RPS11B%2C that arose from the whole genome duplication [Source:SGD%	IV	491515	492324	+	851589
497	YAL038W	64013	1.21667	0.521336	0.00149561	0.00894239	CDC19	Pyruvate kinase%3B functions as a homotetramer in glycolysis to convert phosphoenolpyruvate to pyruvate%2C the input for aerobic (TCA cycle) or anaerobic (glucose fermentation) respiration%3B regulated via allosteric activation by fructose bisphosphate%3	I	71786	73288	+	851193
5211	YMR013C	950.61	1.21794	0.220746	3.80784e-09	1.26137e-07	SEC59	Dolichol kinase%3B catalyzes the terminal step in dolichyl monophosphate (Dol-P) biosynthesis%3B required for viability and for normal rates of lipid intermediate synthesis and protein N-glycosylation [Source:SGD%3BAcc:S000004615]	XIII	295179	296738	-	855026
3309	YHR089C	12910.6	1.22852	0.632739	0.00339755	0.0173246	GAR1	Protein component of the H/ACA snoRNP pseudouridylase complex%3B involved in the modification and cleavage of the 18S pre-rRNA [Source:SGD%3BAcc:S000001131]	VIII	282681	283298	-	856489
1856	YDR343C	222231	1.2335	0.792978	0.00642936	0.0285205	HXT6	High-affinity glucose transporter%3B member of the major facilitator superfamily%2C nearly identical to Hxt7p%2C expressed at high basal levels relative to other HXTs%2C repression of expression by high glucose requires SNF3%3B HXT6 has a paralog%2C HXT1	IV	1159608	1161320	-	851944
6686	YPL080C	260.26	1.23838	0.617371	0.00332948	0.0170834	NA	Putative protein of unknown function%3B conserved across S. cerevisiae strains [Source:SGD%3BAcc:S000006001]	XVI	406172	406498	-	856025
4309	YKL183C-A	81.7445	1.24098	0.528519	0.00143624	0.00866614	NA	Putative protein of unknown function%3B identified by fungal homology and RT-PCR [Source:SGD%3BAcc:S000028558]	XI	98395	98607	-	1500485
3672	YIR015W	1241.12	1.24289	0.202882	9.73541e-11	5.04631e-09	RPR2	Subunit of nuclear RNase P%3B nuclear RNase P cleaves tRNA precursors to generate mature 5' ends and facilitates turnover of nuclear RNAs%3B not shared between RNase MRP and RNase P%2C in contrast to all other RNase P protein subunits%3B protein abundanc	IX	381948	382382	+	854832
6496	YOR298W	1198.86	1.24621	0.365735	6.01676e-05	0.000606559	MUM3	Protein of unknown function involved in outer spore wall organization%3B has similarity to the tafazzins superfamily of acyltransferases [Source:SGD%3BAcc:S000005824]	XV	875599	877038	+	854473
654	YBL072C	51928.5	1.24736	0.331755	1.61328e-05	0.000197769	RPS8A	Protein component of the small (40S) ribosomal subunit%3B homologous to mammalian ribosomal protein S8%2C no bacterial homolog%3B RPS8A has a paralog%2C RPS8B%2C that arose from the whole genome duplication [Source:SGD%3BAcc:S000000168]	II	88523	89125	-	852206
2684	YGL135W	44632.1	1.24968	0.631961	0.00308293	0.0160307	RPL1B	Ribosomal 60S subunit protein L1B%3B N-terminally acetylated%3B homologous to mammalian ribosomal protein L10A and bacterial L1%3B RPL1B has a paralog%2C RPL1A%2C that arose from the whole genome duplication%3B rpl1a rpl1b double null mutation is lethal	VII	254641	255294	+	852742
5837	YNL264C	2733.4	1.25266	0.215446	4.06237e-10	1.73662e-08	PDR17	Phosphatidylinositol transfer protein (PITP)%3B downregulates Plb1p-mediated turnover of phosphatidylcholine%3B forms a complex with Psd2p which appears essential for maintenance of vacuolar PE levels%3B found in the cytosol and microsomes%3B homologous	XIV	145563	146615	-	855457
5944	YNR025C	142.91	1.25434	0.386023	0.00010639	0.000975435	NA	Dubious open reading frame%3B unlikely to encode a functional protein%2C based on available experimental and comparative sequence data%3B deletion reduces expression of PIS1 gene encoding phosphatidylinositol synthase [Source:SGD%3BAcc:S000005308]	XIV	672702	673061	-	NA
5400	YMR182W-A	329.135	1.25597	0.422799	0.000253499	0.00202768	NA	Putative protein of unknown function [Source:SGD%3BAcc:S000028693]	XIII	625811	625897	+	1466502
5443	YMR222C	1624.49	1.26286	0.144294	2.34226e-19	4.9739e-17	FSH2	Putative serine hydrolase that localizes to the cytoplasm%3B sequence is similar to S. cerevisiae Fsh1p and Fsh3p and the human candidate tumor suppressor OVCA2 [Source:SGD%3BAcc:S000004835]	XIII	715638	716309	-	855262
4680	YLR145W	1103.56	1.26554	0.213946	3.46285e-10	1.52837e-08	RMP1	Subunit of RNase MRP%3B RNase MRP processes pre-rRNA and has a role in cell cycle-regulated degradation of daughter cell-specific mRNAs%3B unlike most subunits%2C not shared between RNase MRP and nuclear RNase P [Source:SGD%3BAcc:S000004135]	XII	432168	432773	+	850837
4608	YLR075W	22068.8	1.26578	0.62172	0.00270021	0.0144751	RPL10	Ribosomal 60S subunit protein L10%3B homologous to mammalian ribosomal protein L10 and bacterial L16%3B responsible for joining the 40S and 60S subunits%3B regulates translation initiation%3B similar to members of the QM gene family%3B protein abundance	XII	282927	283592	+	850764
4890	YLR325C	44181	1.26659	0.422559	0.000228448	0.00185893	RPL38	Ribosomal 60S subunit protein L38%3B homologous to mammalian ribosomal protein L38%2C no bacterial homolog [Source:SGD%3BAcc:S000004317]	XII	781143	781379	-	851035
734	YBR031W	60143.3	1.26678	0.258018	9.20722e-08	2.22019e-06	RPL4A	Ribosomal 60S subunit protein L4A%3B N-terminally acetylated%3B homologous to mammalian ribosomal protein L4 and bacterial L4%3B RPL4A has a paralog%2C RPL4B%2C that arose from the whole genome duplication [Source:SGD%3BAcc:S000000235]	II	300166	301254	+	852319
4046	YJR101W	4054.34	1.26746	0.2159	4.5752e-10	1.91838e-08	RSM26	Mitochondrial ribosomal protein of the small subunit [Source:SGD%3BAcc:S000003862]	X	618234	619034	+	853565
6687	YPL081W	7666.48	1.27003	0.666906	0.00346764	0.0176138	RPS9A	Protein component of the small (40S) ribosomal subunit%3B homologous to mammalian ribosomal protein S9 and bacterial S4%3B RPS9A has a paralog%2C RPS9B%2C that arose from the whole genome duplication [Source:SGD%3BAcc:S000006002]	XVI	404950	406044	+	856024
2139	YEL054C	6372.96	1.27017	0.7363	0.00469426	0.022393	RPL12A	Ribosomal 60S subunit protein L12A%3B rpl12a rpl12b double mutant exhibits slow growth and slow translation%3B homologous to mammalian ribosomal protein L12 and bacterial L11%3B RPL12A has a paralog%2C RPL12B%2C that arose from the whole genome duplicati	V	52721	53218	-	856656
6104	YOL097C	8360.49	1.27289	0.192793	4.36625e-12	2.93296e-10	WRS1	Cytoplasmic tryptophanyl-tRNA synthetase%3B aminoacylates tryptophanyl-tRNA%3B human homolog WARS can complement yeast null mutant [Source:SGD%3BAcc:S000005457]	XV	136527	137825	-	854056
6490	YOR293W	34249.5	1.27698	0.504708	0.000854128	0.00562272	RPS10A	Protein component of the small (40S) ribosomal subunit%3B homologous to mammalian ribosomal protein S10%2C no bacterial homolog%3B RPS10A has a paralog%2C RPS10B%2C that arose from the whole genome duplication%3B mutations in the human homolog associated	XV	867098	867852	+	854468
4593	YLR060W	15435.9	1.28347	0.199051	1.19567e-11	7.59782e-10	FRS1	Beta subunit of cytoplasmic phenylalanyl-tRNA synthetase%3B forms a tetramer with Frs2p to generate active enzyme%3B able to hydrolyze mis-aminoacylated tRNA-Phe%2C which could contribute to translational quality control [Source:SGD%3BAcc:S000004050]	XII	260979	262766	+	850749
1305	YDL081C	42828.1	1.28822	0.366381	3.8742e-05	0.000412683	RPP1A	Ribosomal stalk protein P1 alpha%3B involved in the interaction between translational elongation factors and the ribosome%3B free (non-ribosomal) P1 stimulates the phosphorylation of the eIF2 alpha subunit (Sui2p) by Gcn2p%3B accumulation of P1 in the cy	IV	309802	310122	-	851478
1236	YDL014W	21440.1	1.29133	0.672769	0.00326879	0.0168113	NOP1	Histone glutamine methyltransferase%2C modifies H2A at Q105 in nucleolus%3B component of the small subunit processome complex%2C which is required for processing of pre-18S rRNA%3B ortholog of mammalian fibrillarin%3B inviability of the null mutant is fu	IV	427364	428347	+	851548
899	YBR181C	38826	1.29639	0.421856	0.000174347	0.00146768	RPS6B	Protein component of the small (40S) ribosomal subunit%3B homologous to mammalian ribosomal protein S6%2C no bacterial homolog%3B phosphorylated on S233 by Ypk3p in a TORC1-dependent manner%2C and on S232 in a TORC1/2-dependent manner by Ypk1/2/3p%3B RPS	II	591712	592774	-	852479
3280	YHR068W	9879.75	1.29805	0.212077	9.58648e-11	5.00856e-09	DYS1	Deoxyhypusine synthase%3B catalyzes formation of deoxyhypusine%2C the first step in hypusine biosynthesis%3B triggers posttranslational hypusination of translation elongation factor eIF-5A and regulates its intracellular levels%3B tetrameric%3B human hom	VIII	232133	233296	+	856465
602	YBL027W	50950.3	1.30694	0.397127	8.39371e-05	0.000805478	RPL19B	Ribosomal 60S subunit protein L19B%3B rpl19a and rpl19b single null mutations result in slow growth%2C while the double null mutation is lethal%3B homologous to mammalian ribosomal protein L19%2C no bacterial homolog%3B RPL19B has a paralog%2C RPL19A%2C	II	168423	169376	+	852254
3589	YIL114C	1573.59	1.30832	0.225267	6.32778e-10	2.57135e-08	POR2	Putative mitochondrial porin (voltage-dependent anion channel)%3B not required for mitochondrial membrane permeability or mitochondrial osmotic stability%3B POR2 has a paralog%2C POR1%2C that arose from the whole genome duplication [Source:SGD%3BAcc:S000	IX	149143	149988	-	854692
3849	YJL136C	27657.9	1.30886	0.301881	1.35997e-06	2.36674e-05	RPS21B	Protein component of the small (40S) ribosomal subunit%3B homologous to mammalian ribosomal protein S21%2C no bacterial homolog%3B RPS21B has a paralog%2C RPS21A%2C that arose from the whole genome duplication [Source:SGD%3BAcc:S000003672]	X	156550	157273	-	853305
2987	YGR159C	21454.2	1.30934	1.22923	0.00883896	0.0364351	NSR1	Nucleolar protein that binds nuclear localization sequences%3B required for pre-rRNA processing and ribosome biogenesis%3B binds to single stranded telomeric DNA and mRNA%3B methylated by Hmt1p%3B interaction with Top1p and nucleolar localization are neg	VII	806412	807656	-	853064
5209	YMR011W	27146	1.31851	0.422217	0.000143791	0.00126378	HXT2	High-affinity glucose transporter of the major facilitator superfamily%3B expression is induced by low levels of glucose and repressed by high levels of glucose [Source:SGD%3BAcc:S000004613]	XIII	288079	289704	+	855023
1995	YDR471W	23427.2	1.32202	0.492642	0.00054018	0.00381955	RPL27B	Ribosomal 60S subunit protein L27B%3B homologous to mammalian ribosomal protein L27%2C no bacterial homolog%3B RPL27B has a paralog%2C RPL27A%2C that arose from the whole genome duplication [Source:SGD%3BAcc:S000002879]	IV	1401770	1402564	+	852082
6359	YOR167C	30712.2	1.32471	0.366749	2.6078e-05	0.000294969	RPS28A	Protein component of the small (40S) ribosomal subunit%3B has an extraribosomal function in regulation of RPS28B%2C in which Rps28Ap binds to a decapping complex via Edc3p%2C which then binds to RPS28B mRNA leading to its decapping and degradation%3B hom	XV	648804	649007	-	854338
4444	YKR092C	5704.96	1.32676	0.403687	8.39001e-05	0.000805478	SRP40	Nucleolar serine-rich protein%3B role in preribosome assembly or transport%3B may function as a chaperone of small nucleolar ribonucleoprotein particles (snoRNPs)%3B immunologically and structurally to rat Nopp140 [Source:SGD%3BAcc:S000001800]	XI	612665	613885	-	853967
2871	YGR049W	1954.17	1.32776	0.331202	5.49778e-06	7.7832e-05	SCM4	Mitochondrial outer membrane protein of unknown function%3B predicted to have 4 transmembrane segments%3B import is mediated by Tom70p and Mim1p%3B interacts genetically with a cdc4 mutation%3B SCM4 has a paralog%2C ATG33%2C that arose from the whole gen	VII	591314	591877	+	852940
4408	YKR057W	26621.1	1.33256	0.388168	4.97991e-05	0.000513836	RPS21A	Protein component of the small (40S) ribosomal subunit%3B homologous to mammalian ribosomal protein S21%2C no bacterial homolog%3B RPS21A has a paralog%2C RPS21B%2C that arose from the whole genome duplication [Source:SGD%3BAcc:S000001765]	XI	551657	552242	+	853931
1306	YDL082W	26488.9	1.34529	0.422934	0.000117054	0.00105269	RPL13A	Ribosomal 60S subunit protein L13A%3B not essential for viability%3B homologous to mammalian ribosomal protein L13%2C no bacterial homolog%3B RPL13A has a paralog%2C RPL13B%2C that arose from the whole genome duplication [Source:SGD%3BAcc:S000002240]	IV	308424	309388	+	851477
4039	YJR094W-A	23877.3	1.34612	0.419007	0.000104867	0.000962817	RPL43B	Ribosomal 60S subunit protein L43B%3B homologous to mammalian ribosomal protein L37A%2C no bacterial homolog%3B RPL43B has a paralog%2C RPL43A%2C that arose from the whole genome duplication%3B protein abundance increases in response to DNA replication s	X	608305	608858	+	853557
5353	YMR142C	48893.9	1.35352	0.463271	0.000262214	0.00208045	RPL13B	Ribosomal 60S subunit protein L13B%3B not essential for viability%3B homologous to mammalian ribosomal protein L13%2C no bacterial homolog%3B RPL13B has a paralog%2C RPL13A%2C that arose from the whole genome duplication [Source:SGD%3BAcc:S000004750]	XIII	550206	551207	-	855173
2130	YEL047C	7981.94	1.35471	0.38339	3.39769e-05	0.000370928	NA	Soluble fumarate reductase%3B required with isoenzyme Osm1p for anaerobic growth%3B may interact with ribosomes%2C based on co-purification experiments%3B authentic%2C non-tagged protein is detected in purified mitochondria in high-throughput studies%3B	V	65385	66797	-	856664
6431	YOR234C	14825.2	1.35549	0.665764	0.00243041	0.0132445	RPL33B	Ribosomal 60S subunit protein L33B%3B rpl33b null mutant exhibits normal growth while rpl33a rpl33b double null mutant is inviable%3B homologous to mammalian ribosomal protein L35A%2C no bacterial homolog%3B RPL33B has a paralog%2C RPL33A%2C that arose f	XV	778555	779405	-	854409
5129	YML073C	17349.9	1.3605	0.533437	0.000742978	0.00498575	RPL6A	Ribosomal 60S subunit protein L6A%3B N-terminally acetylated%3B binds 5.8S rRNA%3B homologous to mammalian ribosomal protein L6%2C no bacterial homolog%3B RPL6A has a paralog%2C RPL6B%2C that arose from the whole genome duplication [Source:SGD%3BAcc:S000	XIII	123227	124172	-	854902
3609	YIL133C	31117.3	1.36352	0.457626	0.000218066	0.00178327	RPL16A	Ribosomal 60S subunit protein L16A%3B N-terminally acetylated%2C binds 5.8 S rRNA%3B transcriptionally regulated by Rap1p%3B homologous to mammalian ribosomal protein L13A and bacterial L13%3B RPL16A has a paralog%2C RPL16B%2C that arose from the whole g	IX	98527	99416	-	854673
6696	YPL090C	49849.9	1.37303	0.361599	1.22506e-05	0.000157819	RPS6A	Protein component of the small (40S) ribosomal subunit%3B homologous to mammalian ribosomal protein S6%2C no bacterial homolog%3B phosphorylated on S233 by Ypk3p in a TORC1-dependent manner%2C and on S232 in a TORC1/2-dependent manner by Ypk1/2/3p%3B RPS	XVI	377291	378395	-	856015
6505	YOR306C	3547.55	1.37303	0.204909	2.01813e-12	1.47615e-10	MCH5	Plasma membrane riboflavin transporter%3B facilitates the uptake of vitamin B2%3B required for FAD-dependent processes%3B sequence similarity to mammalian monocarboxylate permeases%2C however mutants are not deficient in monocarboxylate transport [Source	XV	889867	891432	-	854483
3249	YHR043C	4565.87	1.37915	0.43557	0.000119008	0.00106589	DOG2	2-deoxyglucose-6-phosphate phosphatase%3B member of a family of low molecular weight phosphatases%2C induced by oxidative and osmotic stress%2C confers 2-deoxyglucose resistance when overexpressed%3B DOG2 has a paralog%2C DOG1%2C that arose from a single	VIII	192805	193545	-	856439
1969	YDR447C	22822.9	1.38689	1.24407	0.00791403	0.0334176	RPS17B	Ribosomal protein 51 (rp51) of the small (40s) subunit%3B homologous to mammalian ribosomal protein S17%2C no bacterial homolog%3B RPS17B has a paralog%2C RPS17A%2C that arose from the whole genome duplication%3B protein abundance increases in response t	IV	1354829	1355553	-	852058
3626	YIL148W	30526.1	1.38803	0.369746	1.43053e-05	0.000179717	RPL40A	Ubiquitin-ribosomal 60S subunit protein L40A fusion protein%3B cleaved to yield ubiquitin and ribosomal protein L40A%3B ubiquitin may facilitate assembly of the ribosomal protein into ribosomes%3B homologous to mammalian ribosomal protein L40%2C no bacte	IX	68708	69528	+	854658
6015	YOL014W	524.415	1.38989	0.322966	1.42751e-06	2.43454e-05	NA	Putative protein of unknown function%3B mCherry fusion protein localizes to the cytosol and nucleus [Source:SGD%3BAcc:S000005374]	XV	299693	300067	+	854146
5777	YNL204C	665.783	1.39985	0.462921	0.000184183	0.00153868	SPS18	Protein of unknown function%2C contains a putative zinc-binding domain%3B expressed during sporulation%3B SPS18 has a paralog%2C GCS1%2C that arose from the whole genome duplication [Source:SGD%3BAcc:S000005148]	XIV	258375	259277	-	855517
5732	YNL160W	115503	1.40175	0.484549	0.000277291	0.0021809	YGP1	Cell wall-related secretory glycoprotein%3B induced by nutrient deprivation-associated growth arrest and upon entry into stationary phase%3B may be involved in adaptation prior to stationary phase entry%3B YGP1 has a paralog%2C SPS100%2C that arose from	XIV	336545	337609	+	855562
4150	YKL035W	35008.9	1.40451	0.734735	0.00294743	0.0154605	UGP1	UDP-glucose pyrophosphorylase (UGPase)%3B catalyses the reversible formation of UDP-Glc from glucose 1-phosphate and UTP%2C involved in a wide variety of metabolic pathways%2C expression modulated by Pho85p through Pho4p%3B involved in PKA-mediated oxida	XI	369891	371390	+	853830
3253	YHR047C	5346.36	1.40457	0.25662	4.02157e-09	1.3237e-07	AAP1	Arginine/alanine amino peptidase%3B overproduction stimulates glycogen accumulation%3B AAP1 has a paralog%2C APE2%2C that arose from the whole genome duplication [Source:SGD%3BAcc:S000001089]	VIII	198740	201310	-	856443
6853	YPL240C	154799	1.40624	0.587915	0.00106497	0.00675407	HSP82	Hsp90 chaperone%3B redundant in function with Hsc82p%3B required for pheromone signaling%2C negative regulation of Hsf1p%3B docks with Tom70p for mitochondrial preprotein delivery%3B promotes telomerase DNA binding%2C nucleotide addition%3B protein abund	XVI	96496	98625	-	855836
1424	YDL191W	24654.4	1.41029	0.384795	1.96645e-05	0.000231576	RPL35A	Ribosomal 60S subunit protein L35A%3B homologous to mammalian ribosomal protein L35 and bacterial L29%3B RPL35A has a paralog%2C RPL35B%2C that arose from the whole genome duplication [Source:SGD%3BAcc:S000002350]	IV	117664	118517	+	851336
123	snR63	408.704	1.41415	0.379206	1.673e-05	0.000202452	NA	NA	NA	NA	NA	NA	9164876
2134	YEL050W-A	49.5194	1.42668	0.404708	3.26878e-05	0.000360504	NA	Dubious open reading frame unlikely to encode a functional protein%3B identified by fungal homology and RT-PCR [Source:SGD%3BAcc:S000028545]	V	59549	59740	+	NA
6511	YOR312C	34143.9	1.45242	0.501987	0.000260081	0.00206777	RPL20B	Ribosomal 60S subunit protein L20B%3B homologous to mammalian ribosomal protein L18A%2C no bacterial homolog%3B RPL20B has a paralog%2C RPL20A%2C that arose from the whole genome duplication [Source:SGD%3BAcc:S000005839]	XV	900250	900767	-	854489
5879	YNL303W	687.281	1.45536	0.69866	0.00223442	0.0123503	NA	Dubious open reading frame%3B unlikely to encode a functional protein%2C based on available experimental and comparative sequence data [Source:SGD%3BAcc:S000005247]	XIV	61510	61857	+	NA
3118	YGR280C	7644.52	1.46663	0.243716	1.55237e-10	7.60013e-09	PXR1	Essential protein involved in rRNA and snoRNA maturation%3B competes with TLC1 RNA for binding to Est2p%2C suggesting a role in negative regulation of telomerase%3B human homolog inhibits telomerase%3B contains a G-patch RNA interacting domain [Source:SG	VII	1050910	1051725	-	853197
4751	YLR198C	180.537	1.46726	0.770823	0.0034903	0.0176607	NA	Dubious open reading frame%3B unlikely to encode a functional protein%2C based on available experimental and comparative sequence data%3B overlaps the verified gene SIK1/YLR197W [Source:SGD%3BAcc:S000004188]	XII	547286	547645	-	NA
4736	YLR183C	1809.13	1.47332	0.421633	3.53984e-05	0.000383901	TOS4	Putative transcription factor%2C contains Forkhead Associated domain%3B binds chromatin%3B involved in expression homeostasis%2C buffering of mRNA synthesis rate against gene dosage changes during S phase%3B target of SBF transcription factor%3B expressi	XII	520543	522012	-	850880
4687	YLR150W	35777.1	1.47409	0.398075	1.61697e-05	0.000197853	STM1	Protein required for optimal translation under nutrient stress%3B perturbs association of Yef3p with ribosomes%3B involved in TOR signaling%3B binds G4 quadruplex and purine motif triplex nucleic acid%3B helps maintain telomere structure%3B protein abund	XII	440467	441288	+	850843
5110	YML056C	21086.7	1.47614	0.329578	6.03921e-07	1.1693e-05	IMD4	Inosine monophosphate dehydrogenase%3B catalyzes the rate-limiting step in the de novo synthesis of GTP%3B member of a four-gene family in S. cerevisiae%2C constitutively expressed%3B IMD4 has a paralog%2C IMD3%2C that arose from the whole genome duplica	XIII	162194	164176	-	854948
3125	YGR287C	723.638	1.48374	0.364317	3.59398e-06	5.38934e-05	IMA1	Major isomaltase (alpha-1%2C6-glucosidase/alpha-methylglucosidase)%3B required for isomaltose utilization%3B preferred specificity for isomaltose%2C alpha-methylglucoside%2C and palatinose%2C but also exhibits alpha-1%2C2 glucosidase activity on sucrose	VII	1067222	1068991	-	853204
1285	YDL061C	15542.8	1.48641	0.570231	0.000564549	0.00397479	RPS29B	Protein component of the small (40S) ribosomal subunit%3B homologous to mammalian ribosomal protein S29 and bacterial S14%3B RPS29B has a paralog%2C RPS29A%2C that arose from the whole genome duplication [Source:SGD%3BAcc:S000002219]	IV	340628	340798	-	851498
4581	YLR048W	41234.7	1.48745	0.457093	8.033e-05	0.000779383	RPS0B	Protein component of the small (40S) ribosomal subunit%3B RPS0B has a paralog%2C RPS0A%2C that arose from the whole genome duplication%3B required for maturation of 18S rRNA along with Rps0Ap%3B deletion of either RPS0 gene reduces growth rate%2C deletio	XII	242232	243349	+	850737
3522	YIL052C	24186.5	1.50759	0.449075	5.55039e-05	0.000565607	RPL34B	Ribosomal 60S subunit protein L34B%3B homologous to mammalian ribosomal protein L34%2C no bacterial homolog%3B RPL34B has a paralog%2C RPL34A%2C that arose from the whole genome duplication [Source:SGD%3BAcc:S000001314]	IX	256226	257063	-	854759
3365	YHR141C	38230.1	1.50903	0.272902	2.68794e-09	9.31302e-08	RPL42B	Ribosomal 60S subunit protein L42B%3B required for propagation of the killer toxin-encoding M1 double-stranded RNA satellite of the L-A double-stranded RNA virus%3B homologous to mammalian ribosomal protein L36A%2C no bacterial homolog%3B RPL42B has a pa	VIII	381990	382751	-	856544
2911	YGR088W	45632.2	1.52925	0.801563	0.00268426	0.0144014	CTT1	Cytosolic catalase T%3B has a role in protection from oxidative damage by hydrogen peroxide [Source:SGD%3BAcc:S000003320]	VII	654634	656322	+	852979
4607	YLR074C	6515.53	1.53261	0.291732	1.21322e-08	3.56547e-07	BUD20	C2H2-type zinc finger protein required for ribosome assembly%3B shuttling factor which associates with pre-60S particles in the nucleus%2C accompanying them to the cytoplasm%3B cytoplasmic dissociation of Bud20p requires Drg1p%3B N-terminus harbors a nuc	XII	281956	282456	-	850763
4905	YLR340W	19307.2	1.53267	0.61613	0.000744778	0.00499274	RPP0	Conserved ribosomal protein P0 of the ribosomal stalk%3B involved in interaction between translational elongation factors and the ribosome%3B phosphorylated on serine 302%3B homologous to mammalian ribosomal protein LP0 and bacterial L10 [Source:SGD%3BAc	XII	805887	806825	+	851052
5018	YLR441C	62280.8	1.54756	0.412855	1.27896e-05	0.000163801	RPS1A	Ribosomal protein 10 (rp10) of the small (40S) subunit%3B homologous to mammalian ribosomal protein S3A%2C no bacterial homolog%3B RPS1A has a paralog%2C RPS1B%2C that arose from the whole genome duplication [Source:SGD%3BAcc:S000004433]	XII	1018141	1018908	-	851162
4060	YJR114W	55.4892	1.55848	0.750346	0.00181962	0.0104525	YJR114W	Dubious open reading frame%3B unlikely to encode a functional protein%2C based on available experimental and comparative sequence data%3B partially overlaps the verified ORF RSM7/YJR113C [Source:SGD%3BAcc:S000003875]	X	638659	639051	+	NA
1462	YDL229W	44904.5	1.56019	0.564338	0.000345449	0.00262597	SSB1	Cytoplasmic ATPase that is a ribosome-associated molecular chaperone%3B functions with J-protein partner Zuo1p%3B may be involved in folding of newly-made polypeptide chains%3B member of the HSP70 family%3B interacts with phosphatase subunit Reg1p%3B SSB	IV	44065	45906	+	851369
5399	YMR182C	2391.98	1.56535	0.297486	1.13838e-08	3.37566e-07	RGM1	Putative zinc finger DNA binding transcription factor%3B contains two N-terminal C2H2 zinc fingers and C-terminal proline rich domain%3B overproduction impairs cell growth and induces expression of genes involved in monosaccharide catabolism and aldehyde	XIII	624532	625167	-	855220
4486	YLL024C	89342.3	1.57177	0.353704	6.65998e-07	1.2708e-05	SSA2	HSP70 family ATP-binding protein%3B involved in protein folding%2C vacuolar import of proteins%3B required for ubiquitin-dependent degradation of short-lived proteins%3B associated with chaperonin-containing T-complex%3B 98%25 identical to paralog Ssa1p	XII	95566	97485	-	850636
5679	YNL111C	2933.31	1.58204	0.278808	1.13685e-09	4.22818e-08	CYB5	Cytochrome b5%3B involved in the sterol and lipid biosynthesis pathways%3B acts as an electron donor to support sterol C5-6 desaturation [Source:SGD%3BAcc:S000005055]	XIV	416940	417302	-	855612
2106	YEL026W	10091.9	1.5833	0.699096	0.00120983	0.00755626	SNU13	RNA binding protein%3B part of U3 snoRNP involved in rRNA processing%2C part of U4/U6-U5 tri-snRNP involved in mRNA splicing%2C similar to human 15.5K protein [Source:SGD%3BAcc:S000000752]	V	101943	102323	+	856687
6287	YOR101W	6343.16	1.59593	0.261038	7.75153e-11	4.11519e-09	RAS1	GTPase involved in G-protein signaling in adenylate cyclase activation%3B plays a role in cell proliferation%3B localized to the plasma membrane%3B homolog of mammalian RAS proto-oncogenes%3B relative distribution to the nucleus increases upon DNA replic	XV	515244	516173	+	854268
1553	YDR064W	45690.7	1.59775	0.499994	8.95667e-05	0.000847152	RPS13	Protein component of the small (40S) ribosomal subunit%3B homologous to mammalian ribosomal protein S13 and bacterial S15 [Source:SGD%3BAcc:S000002471]	IV	579458	580452	+	851636
2234	YER056C-A	18273.7	1.60199	0.512305	0.000111858	0.00101427	RPL34A	Ribosomal 60S subunit protein L34A%3B homologous to mammalian ribosomal protein L34%2C no bacterial homolog%3B RPL34A has a paralog%2C RPL34B%2C that arose from the whole genome duplication [Source:SGD%3BAcc:S000002135]	V	269423	270185	-	856784
791	YBR084C-A	36418.6	1.61054	0.447379	2.14896e-05	0.000249499	RPL19A	Ribosomal 60S subunit protein L19A%3B rpl19a and rpl19b single null mutations result in slow growth%2C while the double null mutation is lethal%3B homologous to mammalian ribosomal protein L19%2C no bacterial homolog%3B RPL19A has a paralog%2C RPL19B%2C	II	414186	415261	-	852379
4306	YKL180W	38014.6	1.61316	0.444227	1.90983e-05	0.000226122	RPL17A	Ribosomal 60S subunit protein L17A%3B required for processing of 27SB pre-rRNA and formation of stable 66S assembly intermediates%3B copurifies with the Dam1 complex (aka DASH complex)%3B homologous to mammalian ribosomal protein L17 and bacterial L22%3B	XI	109269	110129	+	853674
2672	YGL123W	41900.7	1.62451	0.393258	2.55519e-06	4.01451e-05	RPS2	Protein component of the small (40S) subunit%3B essential for control of translational accuracy%3B phosphorylation by C-terminal domain kinase I (CTDK-I) enhances translational accuracy%3B methylated on one or more arginine residues by Hmt1p%3B homologou	VII	277617	278381	+	852754
2624	YGL076C	58758.6	1.62532	0.47117	3.66878e-05	0.00039528	RPL7A	Ribosomal 60S subunit protein L7A%3B required for processing of 27SA3 pre-rRNA to 27SB pre-rRNA during assembly of large ribosomal subunit%3B depletion leads to a turnover of pre-rRNA%3B contains a conserved C-terminal Nucleic acid Binding Domain (NDB2)%	VII	364335	365996	-	852804
5352	YMR141W-A	876.859	1.63262	0.41621	6.20691e-06	8.65679e-05	NA	Dubious open reading frame%3B unlikely to encode a functional protein%2C based on available experimental and comparative sequence data%3B overlaps the verified gene RPL13B/YMR142C [Source:SGD%3BAcc:S000028575]	XIII	550911	551135	+	NA
6137	YOL127W	48026.6	1.64761	0.571554	0.000230069	0.00186981	RPL25	Ribosomal 60S subunit protein L25%3B primary rRNA-binding ribosomal protein component of large ribosomal subunit%3B binds to 25S rRNA via a conserved C-terminal motif%3B homologous to mammalian ribosomal protein L23A and bacterial L23 [Source:SGD%3BAcc:S	XV	80348	81190	+	853993
4398	YKR047W	128.348	1.66144	0.300747	2.62515e-09	9.14357e-08	NA	Dubious open reading frame%3B unlikely to encode a functional protein%2C based on available experimental and comparative sequence data%3B partially overlaps the verified gene NAP1 [Source:SGD%3BAcc:S000001755]	XI	525257	525562	+	NA
5119	YML063W	48559.3	1.66392	0.697257	0.000863737	0.00567463	RPS1B	Ribosomal protein 10 (rp10) of the small (40S) subunit%3B homologous to mammalian ribosomal protein S3A%2C no bacterial homolog%3B RPS1B has a paralog%2C RPS1A%2C that arose from the whole genome duplication [Source:SGD%3BAcc:S000004528]	XIII	146482	147249	+	854939
1903	YDR382W	41791.9	1.6866	0.515914	6.59512e-05	0.000653733	RPP2B	Ribosomal protein P2 beta%3B a component of the ribosomal stalk%2C which is involved in the interaction between translational elongation factors and the ribosome%3B free (non-ribosomal) P2 stimulates the phosphorylation of the eIF2 alpha subunit (Sui2p)	IV	1239492	1239824	+	851990
3221	YHR021C	19077.2	1.69766	0.373057	3.75607e-07	7.72694e-06	RPS27B	Protein component of the small (40S) ribosomal subunit%3B homologous to mammalian ribosomal protein S27%2C no bacterial homolog%3B RPS27B has a paralog%2C RPS27A%2C that arose from the whole genome duplication [Source:SGD%3BAcc:S000001063]	VIII	147871	148669	-	856415
5077	YML026C	42943.6	1.70466	0.571165	0.000163574	0.00139303	RPS18B	Protein component of the small (40S) ribosomal subunit%3B homologous to mammalian ribosomal protein S18 and bacterial S13%3B RPS18B has a paralog%2C RPS18A%2C that arose from the whole genome duplication%3B protein abundance increases in response to DNA	XIII	222987	223828	-	854982
107	snR49	464.331	1.7069	0.428811	4.54911e-06	6.6248e-05	NA	NA	NA	NA	NA	NA	9164966
2256	YER074W	32597.2	1.7078	0.661059	0.000511326	0.00364548	RPS24A	Protein component of the small (40S) ribosomal subunit%3B homologous to mammalian ribosomal protein S24%2C no bacterial homolog%3B RPS24A has a paralog%2C RPS24B%2C that arose from the whole genome duplication [Source:SGD%3BAcc:S000000876]	V	306323	307196	+	856805
4069	YJR123W	98886.9	1.70907	0.430229	4.70153e-06	6.77246e-05	RPS5	Protein component of the small (40S) ribosomal subunit%3B least basic of non-acidic ribosomal proteins%3B phosphorylated in vivo%3B essential for viability%3B homologous to mammalian ribosomal protein S5 and bacterial S7 [Source:SGD%3BAcc:S000003884]	X	651901	652578	+	853587
2296	YER102W	44251.8	1.7464	0.354334	5.77739e-08	1.48565e-06	RPS8B	Protein component of the small (40S) ribosomal subunit%3B homologous to mammalian ribosomal protein S8%2C no bacterial homolog%3B RPS8B has a paralog%2C RPS8A%2C that arose from the whole genome duplication [Source:SGD%3BAcc:S000000904]	V	363100	363702	+	856839
1940	YDR418W	5284.65	1.74758	0.468854	1.23847e-05	0.000159235	RPL12B	Ribosomal 60S subunit protein L12B%3B rpl12a rpl12b double mutant exhibits slow growth and slow translation%3B homologous to mammalian ribosomal protein L12 and bacterial L11%3B RPL12B has a paralog%2C RPL12A%2C that arose from the whole genome duplicati	IV	1301616	1302113	+	852026
1563	YDR074W	45582.9	1.75273	0.682451	0.000524815	0.00373095	TPS2	Phosphatase subunit of the trehalose-6-P synthase/phosphatase complex%3B involved in synthesis of the storage carbohydrate trehalose%3B expression is induced by stress conditions and repressed by the Ras-cAMP pathway%3B protein abundance increases in res	IV	593893	596583	+	851646
5631	YNL067W-A	18.0915	1.7557	1.04368	0.00346361	0.0176069	YNL067W-A	Dubious open reading frame%3B unlikely to encode a functional protein%2C based on available experimental and comparative sequence data [Source:SGD%3BAcc:S000007623]	XIV	498538	498684	+	NA
6042	YOL039W	43578.5	1.76938	0.417845	1.50232e-06	2.52974e-05	RPP2A	Ribosomal protein P2 alpha%3B a component of the ribosomal stalk%2C which is involved in the interaction between translational elongation factors and the ribosome%3B free (non-ribosomal) P2 stimulates the phosphorylation of the eIF2 alpha subunit (Sui2p)	XV	254297	254617	+	854118
4805	YLR249W	185405	1.77238	0.400318	6.298e-07	1.21227e-05	YEF3	Translation elongation factor 3%3B contains two ABC cassettes%3B binds and hydrolyzes ATP%3B YEF3 has a paralog%2C HEF3%2C that arose from the whole genome duplication [Source:SGD%3BAcc:S000004239]	XII	636780	639914	+	850951
5605	YNL043C	45.4351	1.77388	0.527737	4.96725e-05	0.000513334	NA	Dubious open reading frame%3B unlikely to encode a functional protein%2C based on available experimental and comparative sequence data%3B partially overlaps the verified gene YIP3/YNL044W [Source:SGD%3BAcc:S000004988]	XIV	545589	545909	-	NA
1905	YDR384C	2138.01	1.78159	0.277369	9.77909e-12	6.31135e-10	ATO3	Plasma membrane protein%2C putative ammonium transporter%3B regulation pattern suggests a possible role in export of ammonia from the cell%3B phosphorylated in mitochondria%3B member of the TC 9.B.33 YaaH family of putative transporters [Source:SGD%3BAcc	IV	1241204	1242031	-	851992
5680	YNL112W	41530.5	1.78294	0.427234	1.90584e-06	3.12157e-05	DBP2	ATP-dependent RNA helicase of the DEAD-box protein family%3B has strong preference for dsRNA%3B interacts with YRA1%3B required for assembly of Yra1p%2C Nab2p and Mex67p onto mRNA and formation of nuclear mRNP%3B involved in mRNA decay and rRNA processin	XIV	413639	416281	+	855611
3435	YHR203C	32924.6	1.78618	0.516316	3.22667e-05	0.000358804	RPS4B	Protein component of the small (40S) ribosomal subunit%3B homologous to mammalian ribosomal protein S4%2C no bacterial homolog%3B RPS4B has a paralog%2C RPS4A%2C that arose from the whole genome duplication [Source:SGD%3BAcc:S000001246]	VIII	504476	505530	-	856610
4277	YKL153W	130.284	1.79927	0.746702	0.000771669	0.00515385	NA	Dubious open reading frame%3B unlikely to encode a functional protein%2C based on available experimental and comparative sequence data%3B transcription of both YLK153W and the overlapping essential gene GPM1 is reduced in the gcr1 null mutant [Source:SGD	XI	163600	164109	+	NA
5158	YML099W-A	60.6462	1.80353	0.535282	5.2131e-05	0.000536216	YML099W-A	Dubious open reading frame%3B unlikely to encode a functional protein%2C based on available experimental and comparative sequence data%3B partially overlaps the verified ORF ARG81/YML099C [Source:SGD%3BAcc:S000004567]	XIII	74229	74558	+	NA
730	YBR027C	23.1247	1.82265	0.712132	0.000565556	0.00397762	NA	Putative protein of unknown function%3B conserved among S. cerevisiae strains%3B YBR027C is not an essential gene [Source:SGD%3BAcc:S000000231]	II	294024	294356	-	852315
6370	YOR178C	12480.1	1.82852	0.492565	1.25946e-05	0.000161619	GAC1	Regulatory subunit for Glc7p type-1 protein phosphatase (PP1)%3B tethers Glc7p to Gsy2p glycogen synthase%2C binds Hsf1p heat shock transcription factor%2C required for induction of some HSF-regulated genes under heat shock%3B GAC1 has a paralog%2C PIG1%	XV	667860	670241	-	854350
802	YBR092C	6149.78	1.83445	0.462456	4.49568e-06	6.5621e-05	PHO3	Constitutively expressed acid phosphatase similar to Pho5p%3B brought to the cell surface by transport vesicles%3B hydrolyzes thiamin phosphates in the periplasmic space%2C increasing cellular thiamin uptake%3B expression is repressed by thiamin [Source:	II	427698	429101	-	852389
3210	YHR010W	33493.5	1.84459	0.565083	6.15438e-05	0.000617596	RPL27A	Ribosomal 60S subunit protein L27A%3B homologous to mammalian ribosomal protein L27%2C no bacterial homolog%3B RPL27A has a paralog%2C RPL27B%2C that arose from the whole genome duplication [Source:SGD%3BAcc:S000001052]	VIII	126521	127492	+	856401
5436	YMR215W	5005.56	1.86393	0.459764	3.08414e-06	4.72161e-05	GAS3	Putative 1%2C3-beta-glucanosyltransferase%3B has similarity go other GAS family members%3B low abundance%2C possibly inactive member of the GAS family of GPI-containing proteins%3B localizes to the cell wall%3B mRNA induced during sporulation [Source:SGD	XIII	696796	698370	+	855255
751	YBR048W	21279.5	1.86465	0.541079	3.24504e-05	0.000359632	RPS11B	Protein component of the small (40S) ribosomal subunit%3B homologous to mammalian ribosomal protein S11 and bacterial S17%3B RPS11B has a paralog%2C RPS11A%2C that arose from the whole genome duplication [Source:SGD%3BAcc:S000000252]	II	332831	333812	+	852337
2310	YER117W	34588.6	1.87176	0.383935	7.11742e-08	1.77477e-06	RPL23B	Ribosomal 60S subunit protein L23B%3B homologous to mammalian ribosomal protein L23 and bacterial L14%3B RPL23B has a paralog%2C RPL23A%2C that arose from the whole genome duplication [Source:SGD%3BAcc:S000000919]	V	396769	397653	+	856853
4652	YLR118C	3208.85	1.87286	0.303898	4.98673e-11	2.80578e-09	YLR118C	Acyl-protein thioesterase responsible for depalmitoylation of Gpa1p%3B green fluorescent protein (GFP)-fusion protein localizes to both the cytoplasm and nucleus and is induced in response to the DNA-damaging agent MMS [Source:SGD%3BAcc:S000004108]	XII	384725	385408	-	850809
4446	YKR094C	27954.5	1.89008	0.598666	8.5695e-05	0.00081758	RPL40B	Ubiquitin-ribosomal 60S subunit protein L40B fusion protein%3B cleaved to yield ubiquitin and ribosomal protein L40B%3B ubiquitin may facilitate assembly of the ribosomal protein into ribosomes%3B homologous to mammalian ribosomal protein L40%2C no bacte	XI	617996	618750	-	853969
5354	YMR143W	34449.3	1.90007	0.419274	3.68295e-07	7.60027e-06	RPS16A	Protein component of the small (40S) ribosomal subunit%3B homologous to mammalian ribosomal protein S16 and bacterial S9%3B RPS16A has a paralog%2C RPS16B%2C that arose from the whole genome duplication [Source:SGD%3BAcc:S000004751]	XIII	551928	552903	+	855174
3091	YGR254W	108076	1.91298	0.496373	6.92468e-06	9.57671e-05	ENO1	Enolase I%2C a phosphopyruvate hydratase%3B catalyzes conversion of 2-phosphoglycerate to phosphoenolpyruvate during glycolysis and the reverse reaction during gluconeogenesis%3B expression repressed in response to glucose%3B protein abundance increases	VII	1000927	1002240	+	853169
1855	YDR342C	207081	1.92758	0.760056	0.000528098	0.0037462	HXT7	High-affinity glucose transporter%3B member of the major facilitator superfamily%2C nearly identical to Hxt6p%2C expressed at high basal levels relative to other HXTs%2C expression repressed by high glucose levels%3B HXT7 has a paralog%2C HXT4%2C that ar	IV	1154216	1155928	-	851943
1299	YDL075W	35683.7	1.94785	0.515827	9.15953e-06	0.000122555	RPL31A	Ribosomal 60S subunit protein L31A%3B associates with karyopherin Sxm1p%3B loss of both Rpl31p and Rpl39p confers lethality%3B homologous to mammalian ribosomal protein L31%2C no bacterial homolog%3B RPL31A has a paralog%2C RPL31B%2C that arose from the	IV	322226	322988	+	851484
4958	YLR388W	8499.57	1.95252	0.374866	1.23259e-08	3.60628e-07	RPS29A	Protein component of the small (40S) ribosomal subunit%3B homologous to mammalian ribosomal protein S29 and bacterial S14%3B RPS29A has a paralog%2C RPS29B%2C that arose from the whole genome duplication [Source:SGD%3BAcc:S000004380]	XII	898651	898821	+	851104
1307	YDL083C	34574.9	1.976	0.433204	3.11747e-07	6.59882e-06	RPS16B	Protein component of the small (40S) ribosomal subunit%3B homologous to mammalian ribosomal protein S16 and bacterial S9%3B RPS16B has a paralog%2C RPS16A%2C that arose from the whole genome duplication [Source:SGD%3BAcc:S000002241]	IV	306926	307789	-	851476
5383	YMR169C	55548.3	1.97919	0.764929	0.000448631	0.00329912	ALD3	Cytoplasmic aldehyde dehydrogenase%3B involved in beta-alanine synthesis%3B uses NAD+ as the preferred coenzyme%3B very similar to Ald2p%3B expression is induced by stress and repressed by glucose [Source:SGD%3BAcc:S000004779]	XIII	599352	600872	-	855205
6231	YOR047C	3433.78	1.97998	0.407109	7.16743e-08	1.7805e-06	STD1	Protein involved in control of glucose-regulated gene expression%3B interacts with kinase Snf1p%2C glucose sensors Snf3p and Rgt2p%2C TATA-binding Spt15p%3B regulator of transcription factor Rgt1p%3B interactions with Pma1p appear to propagate [GAR+]%3B	XV	416347	417681	-	854212
4738	YLR185W	18608.1	1.98397	0.588029	3.96723e-05	0.00041853	RPL37A	Ribosomal 60S subunit protein L37A%3B required for processing of 27SB pre-rRNA and formation of stable 66S assembly intermediates%3B homologous to mammalian ribosomal protein L37%2C no bacterial homolog%3B RPL37A has a paralog%2C RPL37B%2C that arose fro	XII	522663	523288	+	850882
6235	YOR051C	8135.15	1.99421	0.210374	1.83043e-22	4.8199e-20	ETT1	Nuclear protein that inhibits replication of Brome mosaic virus%3B S. cerevisiae is a model system for studying replication of positive-strand RNA viruses in their natural hosts%3B deletion increases stop codon readthrough [Source:SGD%3BAcc:S000005577]	XV	424846	426084	-	854216
794	YBR085W	831.369	2.0188	0.34096	2.02205e-10	9.57638e-09	AAC3	Mitochondrial inner membrane ADP/ATP translocator%3B exchanges cytosolic ADP for mitochondrially synthesized ATP%3B expressed under anaerobic conditions%3B similar to Aac1p%3B has roles in maintenance of viability and in respiration%3B AAC3 has a paralog	II	415983	416906	+	852380
3541	YIL069C	21393.2	2.03743	0.479079	1.24122e-06	2.18475e-05	RPS24B	Protein component of the small (40S) ribosomal subunit%3B homologous to mammalian ribosomal protein S24%2C no bacterial homolog%3B RPS24B has a paralog%2C RPS24A%2C that arose from the whole genome duplication [Source:SGD%3BAcc:S000001331]	IX	231553	232369	-	854741
910	YBR191W	32860.2	2.04064	0.659746	9.89493e-05	0.000918736	RPL21A	Ribosomal 60S subunit protein L21A%3B homologous to mammalian ribosomal protein L21%2C no bacterial homolog%3B RPL21A has a paralog%2C RPL21B%2C that arose from the whole genome duplication [Source:SGD%3BAcc:S000000395]	II	606270	607140	+	852489
3953	YJR009C	90868.1	2.09092	0.471726	5.3872e-07	1.06419e-05	TDH2	Glyceraldehyde-3-phosphate dehydrogenase (GAPDH)%2C isozyme 2%3B involved in glycolysis and gluconeogenesis%3B tetramer that catalyzes reaction of glyceraldehyde-3-phosphate to 1%2C3 bis-phosphoglycerate%3B detected in cytoplasm and cell wall%3B protein	X	453683	454681	-	853465
6574	YOR369C	62615.9	2.09835	0.51144	2.2775e-06	3.65678e-05	RPS12	Protein component of the small (40S) ribosomal subunit%3B homologous to mammalian ribosomal protein S12%2C no bacterial homolog [Source:SGD%3BAcc:S000005896]	XV	1028194	1028625	-	854551
3992	YJR047C	1343.85	2.1022	0.705873	0.000136337	0.00120149	ANB1	Translation elongation factor eIF-5A%3B previously thought to function in translation initiation%3B undergoes an essential hypusination modification%3B expressed under anaerobic conditions%3B ANB1 has a paralog%2C HYP2%2C that arose from the whole genome	X	524908	525381	-	853506
3892	YJL177W	27127.8	2.11936	0.556728	7.65469e-06	0.000104981	RPL17B	Ribosomal 60S subunit protein L17B%3B required for processing of 27SB pre-rRNA and formation of stable 66S assembly intermediates%3B homologous to mammalian ribosomal protein L17 and bacterial L22%3B RPL17B has a paralog%2C RPL17A%2C that arose from the	X	90786	91657	+	853262
908	YBR189W	54879.9	2.13433	0.653947	5.44406e-05	0.000556494	RPS9B	Protein component of the small (40S) ribosomal subunit%3B homologous to mammalian ribosomal protein S9 and bacterial S4%3B RPS9B has a paralog%2C RPS9A%2C that arose from the whole genome duplication [Source:SGD%3BAcc:S000000393]	II	604508	605508	+	852487
3400	YHR174W	263835	2.14497	0.490921	7.00259e-07	1.32466e-05	ENO2	Enolase II%2C a phosphopyruvate hydratase%3B catalyzes conversion of 2-phosphoglycerate to phosphoenolpyruvate during glycolysis and the reverse reaction during gluconeogenesis%3B expression induced in response to glucose%3B ENO2 has a paralog%2C ENO1%2C	VIII	451327	452640	+	856579
2512	YFR031C-A	42127.1	2.14505	0.551625	5.44813e-06	7.72954e-05	RPL2A	Ribosomal 60S subunit protein L2A%3B homologous to mammalian ribosomal protein L2 and bacterial L2%3B RPL2A has a paralog%2C RPL2B%2C that arose from the whole genome duplication [Source:SGD%3BAcc:S000002104]	VI	220507	221418	-	850590
1361	YDL133C-A	17661.2	2.14818	0.509631	1.38565e-06	2.37171e-05	RPL41B	Ribosomal 60S subunit protein L41B%3B comprises only 25 amino acids%3B rpl41a rpl41b double null mutant is viable%3B homologous to mammalian ribosomal protein L41%2C no bacterial homolog%3B RPL41B has a paralog%2C RPL41A%2C that arose from the whole geno	IV	221724	221801	-	851422
6623	YPL019C	18331.4	2.16177	0.282856	1.36607e-15	1.69676e-13	VTC3	Regulatory subunit of the vacuolar transporter chaperone (VTC) complex%3B involved in membrane trafficking%2C vacuolar polyphosphate accumulation%2C microautophagy and non-autophagic vacuolar fusion%3B VTC3 has a paralog%2C VTC2%2C that arose from the wh	XVI	514511	517018	-	856088
675	YBL092W	53072.4	2.17923	0.533919	2.43466e-06	3.87639e-05	RPL32	Ribosomal 60S subunit protein L32%3B overexpression disrupts telomeric silencing%3B homologous to mammalian ribosomal protein L32%2C no bacterial homolog [Source:SGD%3BAcc:S000000188]	II	45978	46370	+	852185
4093	YJR145C	51455.9	2.18751	0.463798	1.37349e-07	3.20628e-06	RPS4A	Protein component of the small (40S) ribosomal subunit%3B mutation affects 20S pre-rRNA processing%3B homologous to mammalian ribosomal protein S4%2C no bacterial homolog%3B RPS4A has a paralog%2C RPS4B%2C that arose from the whole genome duplication [So	X	702027	703068	-	853610
6282	YOR096W	35556.3	2.21751	0.477075	1.89095e-07	4.21971e-06	RPS7A	Protein component of the small (40S) ribosomal subunit%3B interacts with Kti11p%3B deletion causes hypersensitivity to zymocin%3B homologous to mammalian ribosomal protein S7%2C no bacterial homolog%3B RPS7A has a paralog%2C RPS7B%2C that arose from the	XV	505794	506767	+	854263
3482	YIL018W	65574.1	2.22262	0.530406	1.50639e-06	2.52974e-05	RPL2B	Ribosomal 60S subunit protein L2B%3B homologous to mammalian ribosomal protein L2 and bacterial L2%3B RPL2B has a paralog%2C RPL2A%2C that arose from the whole genome duplication%3B expression is upregulated at low temperatures [Source:SGD%3BAcc:S0000012	IX	316768	317932	+	854794
2707	YGL158W	280.238	2.23796	0.411235	3.44942e-09	1.16449e-07	RCK1	Protein kinase involved in oxidative stress response%3B promotes pseudohyphal growth via activation of Ubp3p phosphorylation%3B identified as suppressor of S. pombe cell cycle checkpoint mutations%3B RCK1 has a paralog%2C RCK2%2C that arose from the whol	VII	207033	208571	+	852719
4118	YKL006W	37972.6	2.27167	0.616667	1.15958e-05	0.00015086	RPL14A	Ribosomal 60S subunit protein L14A%3B N-terminally acetylated%3B homologous to mammalian ribosomal protein L14%2C no bacterial homolog%3B RPL14A has a paralog%2C RPL14B%2C that arose from the whole genome duplication [Source:SGD%3BAcc:S000001489]	XI	431906	432720	+	853864
3523	YIL053W	49447.1	2.27683	0.323492	1.19594e-13	1.17505e-11	NA	Constitutively expressed DL-glycerol-3-phosphate phosphatase%3B also known as glycerol-1-phosphatase%3B involved in glycerol biosynthesis%2C induced in response to both anaerobic and osmotic stress%3B GPP1 has a paralog%2C GPP2%2C that arose from the who	IX	255115	255867	+	854758
966	YBR238C	3758.24	2.31546	0.44188	9.15215e-09	2.79598e-07	NA	Mitochondrial membrane protein%3B not required for respiratory growth but causes a synthetic respiratory defect in combination with rmd9 mutations%3B transcriptionally up-regulated by TOR%3B deletion increases life span%3B YBR238C has a paralog%2C RMD9%2	II	695107	697302	-	852540
4507	YLL045C	23710.5	2.32942	0.540779	8.8871e-07	1.62963e-05	RPL8B	Ribosomal 60S subunit protein L8B%3B required for processing of 27SA3 pre-rRNA to 27SB pre-rRNA during assembly of large ribosomal subunit%3B depletion leads to a turnover of pre-rRNA%3B L8 binds to Domain I of 25S and 5.8 S rRNAs%3B mutation results in	XII	47859	48629	-	850682
4720	YLR167W	112306	2.35423	0.482733	5.90489e-08	1.50666e-06	RPS31	Fusion protein cleaved to yield ribosomal protein S31 and ubiquitin%3B ubiquitin may facilitate assembly of the ribosomal protein into ribosomes%3B interacts genetically with translation factor eIF2B%3B homologous to mammalian ribosomal protein S27A%2C n	XII	498947	499405	+	850864
4561	YLR029C	50497.2	2.3567	0.508989	1.98063e-07	4.40489e-06	RPL15A	Ribosomal 60S subunit protein L15A%3B binds to 5.8 S rRNA%3B homologous to mammalian ribosomal protein L15%2C no bacterial homolog%3B RPL15A has a paralog%2C RPL15B%2C that arose from the whole genome duplication [Source:SGD%3BAcc:S000004019]	XII	201976	202590	-	850716
2539	YFR053C	259719	2.35748	1.49033	0.00290091	0.0152773	HXK1	Hexokinase isoenzyme 1%3B a cytosolic protein that catalyzes phosphorylation of glucose during glucose metabolism%3B expression is highest during growth on non-glucose carbon sources%3B glucose-induced repression involves hexokinase Hxk2p%3B HXK1 has a p	VI	253592	255049	-	850614
3176	YHL033C	19281.3	2.3694	0.738486	6.11102e-05	0.000614181	RPL8A	Ribosomal 60S subunit protein L8A%3B required for processing of 27SA3 pre-rRNA to 27SB pre-rRNA during assembly of large ribosomal subunit%3B depletion leads to a turnover of pre-rRNA%3B L8 binds to Domain I of 25S and 5.8 S rRNAs%3B mutation results in	VIII	35255	36025	-	856352
5323	YMR116C	71565.4	2.39119	0.410736	3.34107e-10	1.4861e-08	ASC1	G-protein beta subunit and guanine dissociation inhibitor for Gpa2p%3B ortholog of RACK1 that inhibits translation%3B core component of the small (40S) ribosomal subunit%3B required to prevent frameshifting at ribosomes stalled at repeated CGA codons%3B	XIII	499456	500688	-	855143
2853	YGR034W	30957.9	2.42049	0.47705	2.1533e-08	5.98108e-07	RPL26B	Ribosomal 60S subunit protein L26B%3B binds to 5.8S rRNA%3B non-essential even when paralog is also deleted%3B deletion has minimal affections on ribosome biosynthesis%3B homologous to mammalian ribosomal protein L26 and bacterial L24%3B RPL26B has a par	VII	555812	556672	+	852922
5751	YNL178W	63476.3	2.42713	0.620477	4.55877e-06	6.6248e-05	RPS3	Protein component of the small (40S) ribosomal subunit%3B has apurinic/apyrimidinic (AP) endonuclease activity%3B essential for viability%3B nascent Rps3p is bound by specific chaperone Yar1p during translation%3B homologous to mammalian ribosomal protei	XIV	302680	303402	+	855543
2537	YFR052C-A	651.161	2.44479	1.04412	0.000685947	0.00466443	NA	Dubious open reading frame%3B unlikely to encode a functional protein%2C based on available experimental and comparative sequence data%3B overlaps ORF HXK1/YFR053C [Source:SGD%3BAcc:S000028768]	VI	253429	253734	-	NA
4977	YLR406C	16870	2.45658	0.52589	1.61019e-07	3.69333e-06	RPL31B	Ribosomal 60S subunit protein L31B%3B associates with karyopherin Sxm1p%3B loss of both Rpl31p and Rpl39p confers lethality%3B homologous to mammalian ribosomal protein L31%2C no bacterial homolog%3B RPL31B has a paralog%2C RPL31A%2C that arose from the	XII	931065	931755	-	851122
2514	YFR032C-A	15902.7	2.45793	0.499643	4.69033e-08	1.23014e-06	RPL29	Ribosomal 60S subunit protein L29%3B not essential for translation%2C but required for proper joining of large and small ribosomal subunits and for normal translation rate%3B homologous to mammalian ribosomal protein L29%2C no bacterial homolog [Source:S	VI	223258	223437	-	850592
5878	YNL302C	38278.4	2.49131	0.445492	1.24745e-09	4.58304e-08	RPS19B	Protein component of the small (40S) ribosomal subunit%3B required for assembly and maturation of pre-40 S particles%3B homologous to mammalian ribosomal protein S19%2C no bacterial homolog%3B mutations in human RPS19 are associated with Diamond Blackfan	XIV	61958	62943	-	855414
2706	YGL157W	3279.87	2.53195	0.42762	1.81215e-10	8.70758e-09	ARI1	NADPH-dependent aldehyde reductase%3B utilizes aromatic and alophatic aldehyde substrates%3B member of the short-chain dehydrogenase/reductase superfamily [Source:SGD%3BAcc:S000003125]	VII	209006	210049	+	852720
6739	YPL131W	71575.1	2.55438	0.51218	3.24203e-08	8.60576e-07	RPL5	Ribosomal 60S subunit protein L5%3B nascent Rpl5p is bound by specific chaperone Syo1p during translation%3B homologous to mammalian ribosomal protein L5 and bacterial L18%3B binds 5S rRNA and is required for 60S subunit assembly [Source:SGD%3BAcc:S00000	XVI	303121	304014	+	855972
2576	YGL030W	43350.7	2.57118	0.662032	4.88938e-06	7.01238e-05	RPL30	Ribosomal 60S subunit protein L30%3B involved in pre-rRNA processing in the nucleolus%3B autoregulates splicing of its transcript%3B homologous to mammalian ribosomal protein L30%2C no bacterial homolog [Source:SGD%3BAcc:S000002998]	VII	439091	439638	+	852853
6130	YOL120C	52721.5	2.63136	0.54744	7.93223e-08	1.94119e-06	RPL18A	Ribosomal 60S subunit protein L18A%3B intron of RPL18A pre-mRNA forms stem-loop structures that are a target for Rnt1p cleavage leading to degradation%3B homologous to mammalian ribosomal protein L18%2C no bacterial homolog%3B RPL18A has a paralog%2C RPL	XV	93395	94402	-	854029
2805	YGL253W	54034.8	2.65209	0.345035	8.66355e-16	1.09677e-13	HXK2	Hexokinase isoenzyme 2%3B phosphorylates glucose in cytosol%3B predominant hexokinase during growth on glucose%3B represses expression of HXK1%2C GLK1%2C induces expression of its own gene%3B antiapoptotic%3B phosphorylation/dephosphorylation at Ser14 by	VII	23935	25395	+	852639
3155	YHL015W	59814.7	2.69603	0.407615	2.06626e-12	1.49475e-10	RPS20	Protein component of the small (40S) ribosomal subunit%3B overproduction suppresses mutations affecting RNA polymerase III-dependent transcription%3B homologous to mammalian ribosomal protein S20 and bacterial S10 [Source:SGD%3BAcc:S000001007]	VIII	75412	75777	+	856371
3905	YJL190C	33950.9	2.75508	0.66115	1.4765e-06	2.50511e-05	RPS22A	Protein component of the small (40S) ribosomal subunit%3B homologous to mammalian ribosomal protein S15A and bacterial S8%3B RPS22A has a paralog%2C RPS22B%2C that arose from the whole genome duplication [Source:SGD%3BAcc:S000003726]	X	74910	75302	-	853249
2577	YGL031C	36348.2	2.80849	0.672846	NA	NA	RPL24A	Ribosomal 60S subunit protein L24A%3B not essential for translation but may be required for normal translation rate%3B homologous to mammalian ribosomal protein L24%2C no bacterial homolog%3B RPL24A has a paralog%2C RPL24B%2C that arose from the whole ge	VII	437467	437934	-	852852
6247	YOR063W	120328	2.86633	0.45192	1.20032e-11	7.59782e-10	RPL3	Ribosomal 60S subunit protein L3%3B homologous to mammalian ribosomal protein L3 and bacterial L3%3B plays an important role in function of eIF5B in stimulating 3' end processing of 18S rRNA in context of 80S ribosomes that have not yet engaged in transl	XV	444686	445849	+	854229
569	YAR071W	5179.64	2.87467	0.348541	9.03961e-18	1.65299e-15	PHO11	One of three repressible acid phosphatases%3B glycoprotein that is transported to the cell surface by the secretory pathway%3B induced by phosphate starvation and coordinately regulated by PHO4 and PHO2%3B PHO11 has a paralog%2C PHO12%2C that arose from	I	225460	226863	+	851299
6146	YOL136C	5733.31	2.88088	0.415429	2.17582e-13	1.9356e-11	PFK27	6-phosphofructo-2-kinase%3B catalyzes synthesis of fructose-2%2C6-bisphosphate%3B inhibited by phosphoenolpyruvate and sn-glycerol 3-phosphate%2C expression induced by glucose and sucrose%2C transcriptional regulation involves protein kinase A [Source:SG	XV	67561	68754	-	853984
803	YBR093C	5519.89	2.94138	0.228775	4.51638e-39	4.95522e-36	PHO5	Repressible acid phosphatase%3B 1 of 3 repressible acid phosphatases that also mediates extracellular nucleotide-derived phosphate hydrolysis%3B secretory pathway derived cell surface glycoprotein%3B induced by phosphate starvation and coordinately regul	II	429548	430951	-	852390
2325	YER131W	34987.9	3.11921	0.592216	6.91109e-09	2.12597e-07	RPS26B	Protein component of the small (40S) ribosomal subunit%3B homologous to mammalian ribosomal protein S26%2C no bacterial homolog%3B RPS26B has a paralog%2C RPS26A%2C that arose from the whole genome duplication%3B human homolog can partially complement an	V	423952	424311	+	856868
3455	YHR215W	6865.56	3.23641	0.361113	1.71027e-20	3.75291e-18	PHO12	One of three repressible acid phosphatases%3B glycoprotein that is transported to the cell surface by the secretory pathway%3B pregulated by phosphate starvation%3B PHO12 has a paralog%2C PHO11%2C that arose from a segmental duplication [Source:SGD%3BAcc	VIII	552099	553502	+	856625
6037	YOL035C	6.32547	3.3549	1.97125	0.00266309	0.0143206	NA	Dubious open reading frame%3B unlikely to encode a functional protein%2C based on available experimental and comparative sequence data [Source:SGD%3BAcc:S000005395]	XV	258803	259105	-	NA
3456	YHR216W	3301.14	3.38016	0.674656	2.47298e-08	6.81155e-07	IMD2	Inosine monophosphate dehydrogenase%3B catalyzes the rate-limiting step in GTP biosynthesis%2C expression is induced by mycophenolic acid resulting in resistance to the drug%2C expression is repressed by nutrient limitation%3B IMD2 has a paralog%2C YAR07	VIII	554396	555967	+	856626
1858	YDR345C	74822.2	3.41436	0.764277	3.46014e-07	7.18551e-06	HXT3	Low affinity glucose transporter of the major facilitator superfamily%3B expression is induced in low or high glucose conditions%3B HXT3 has a paralog%2C HXT5%2C that arose from the whole genome duplication [Source:SGD%3BAcc:S000002753]	IV	1162957	1164660	-	851946
190	tD(GUC)O	14.5095	3.77969	2.58714	0.00175621	0.0101769	NA	NA	NA	NA	NA	NA	854298
1262	YDL039C	8407.36	4.59611	0.698384	2.12391e-12	1.51975e-10	PRM7	Pheromone-regulated protein%3B predicted to have one transmembrane segment%3B promoter contains Gcn4p binding elements%3B in W303 strain one continuous open reading frame comprising of YDL037C%2C the intergenic region and YDL039C encodes the IMI1 [Source	IV	381985	384081	-	851522
1261	YDL037C	2860.81	4.80231	0.612205	2.02633e-16	2.89985e-14	BSC1	Protein of unconfirmed function%3B similar to cell surface flocculin Flo11p%3B ORF exhibits genomic organization compatible with a translational readthrough-dependent mode of expression%3B in W303 strain one continuous open reading frame comprising of YD	IV	384601	385587	-	851524
3312	YHR092C	16087.6	7.41722	1.128	2.15237e-12	1.52355e-10	HXT4	High-affinity glucose transporter%3B member of the major facilitator superfamily%2C expression is induced by low levels of glucose and repressed by high levels of glucose%3B HXT4 has a paralog%2C HXT7%2C that arose from the whole genome duplication [Sour	VIII	287081	288811	-	856492

## Sheet: cluster 1 (n=30)
	GeneID	baseMean	log2FoldChange	lfcSE	pvalue	padj	GeneName	Description	Chromosome	Start	Stop	Strand	Entrez_ID
531	YAL067C	475.546	-2.2296	0.270783	1.21948e-17	2.16969e-15	SEO1	Putative permease%3B member of the allantoate transporter subfamily of the major facilitator superfamily%3B mutation confers resistance to ethionine sulfoxide [Source:SGD%3BAcc:S000000062]	I	7235	9016	-	851230
6173	YOL162W	128.02	-1.96482	0.328511	1.55859e-10	7.60013e-09	NA	Putative protein of unknown function%3B member of the Dal5p subfamily of the major facilitator family [Source:SGD%3BAcc:S000005522]	XV	10119	10766	+	854002
6599	YOR392W	55.9314	-1.75709	0.749811	0.00101484	0.00649873	NA	Dubious open reading frame%3B unlikely to encode a functional protein%2C based on available experimental and comparative sequence data%3B gene expression induced by heat [Source:SGD%3BAcc:S000005919]	XV	1079282	1079725	+	NA
3935	YJL219W	784.666	-1.19558	0.191008	4.58279e-11	2.62335e-09	HXT9	Putative hexose transporter that is nearly identical to Hxt11p%3B has similarity to major facilitator superfamily (MFS) transporters%2C expression of HXT9 is regulated by transcription factors Pdr1p and Pdr3p [Source:SGD%3BAcc:S000003755]	X	19497	21200	+	853236
2540	YFR054C	107.021	-1.50428	0.375544	4.97967e-06	7.11088e-05	NA	Putative protein of unknown function%3B conserved among S. cerevisiae strains [Source:SGD%3BAcc:S000001950]	VI	258855	259433	-	850615
1479	YDL245C	1468.67	-1.34829	0.194395	4.11811e-13	3.30604e-11	HXT15	Putative transmembrane polyol transporter%3B supports growth on and uptake of mannitol%2C sorbitol and xylitol with moderate affinity when overexpressed in a strain deleted for hexose family members%3B minor hexose transport activity when overexpressed i	IV	11657	13360	-	851352
4107	YJR158W	920.82	-1.27555	0.195003	7.04686e-12	4.59302e-10	HXT16	Putative transmembrane polyol transporter%3B supports growth on and uptake of sorbitol with moderate affinity and mannitol with lower affinity when overexpressed in a strain deleted for hexose family members%3B minor hexose transport activity when overex	X	732440	734143	+	853623
4106	YJR157W	75.4331	-1.03212	0.560016	0.00565629	0.0259661	NA	Dubious open reading frame%3B unlikely to encode a functional protein%2C based on available experimental and comparative sequence data [Source:SGD%3BAcc:S000003918]	X	730515	730877	+	NA
1923	YDR402C	218.831	-1.09638	0.304567	3.74829e-05	0.000401873	DIT2	N-formyltyrosine oxidase%3B sporulation-specific microsomal enzyme involved in the production of N%2CN-bisformyl dityrosine required for spore wall maturation%2C homologous to cytochrome P-450s%3B SWAT-GFP and mCherry fusion proteins localize to the endo	IV	1272234	1273703	-	852011
5217	YMR017W	244.082	-1.85402	0.313443	2.82485e-10	1.29139e-08	SPO20	Meiosis-specific subunit of the t-SNARE complex%3B required for prospore membrane formation during sporulation%3B similar to but not functionally redundant with Sec9p%3B binds to phosphatidic acid%3B SNAP-25 homolog [Source:SGD%3BAcc:S000004619]	XIII	307489	308682	+	855031
4100	YJR151W-A	10.1778	-2.04895	1.18394	0.00373829	0.0187284	NA	Putative protein of unknown function%3B identified by fungal homology and RT-PCR%3B predicted to have a role in transcription based on computational	X	717580	717630	+	1466471
5218	YMR018W	321.75	-1.27768	0.35749	3.23248e-05	0.000358844	PEX9	Putative protein of unknown function with similarity to human PEX5Rp%3B transcription increases during colony development similar to genes involved in peroxisome biogenesis%3B YMR018W is not an essential gene%3B PEX5Rp is also known as peroxin protein 5	XIII	310208	311752	+	855032
6590	YOR383C	6723.34	-1.47795	0.407061	2.18549e-05	0.000252849	FIT3	Mannoprotein that is incorporated into the cell wall%3B incorporated via a glycosylphosphatidylinositol (GPI) anchor%3B involved in the retention of siderophore-iron in the cell wall [Source:SGD%3BAcc:S000005910]	XV	1060441	1061055	-	854565
3595	YIL119C	2242.56	-2.27126	0.311737	2.06779e-14	2.23152e-12	RPI1	Transcription factor%2C allelic differences between S288C and Sigma1278b%3B mediates fermentation stress tolerance by modulating cell wall integrity%3B overexpression suppresses heat shock sensitivity of wild-type RAS2 overexpression and also suppresses	IX	136654	137877	-	854687
6589	YOR382W	10002.9	-3.95188	0.53062	5.03527e-15	6.02677e-13	FIT2	Mannoprotein that is incorporated into the cell wall%3B incorporated via a glycosylphosphatidylinositol (GPI) anchor%3B involved in the retention of siderophore-iron in the cell wall [Source:SGD%3BAcc:S000005909]	XV	1059531	1059992	+	854564
252	tI(AAU)E1	9.17631	-4.13969	1.72852	0.000666059	0.00456394	NA	NA	NA	NA	NA	NA	856878
394	tS(UGA)I	22.3195	-2.83564	0.843207	3.81553e-05	0.000407754	NA	NA	NA	NA	NA	NA	854754
5261	YMR057C	54.0631	-2.94469	0.675059	6.64586e-07	1.2708e-05	NA	Dubious open reading frame%3B unlikely to encode a functional protein%2C based on available experimental and comparative sequence data%3B partially overlaps verified ORF AAC1 [Source:SGD%3BAcc:S000004661]	XIII	388359	388730	-	NA
6581	YOR376W	94.3915	-1.59415	0.756771	0.00175266	0.0101654	NA	Putative protein of unknown function%3B conserved among S. cerevisiae strains%3B YOR376W is not an essential gene [Source:SGD%3BAcc:S000005903]	XV	1043191	1043559	+	854558
5595	YNL034W	128.393	-1.38676	0.372298	1.6485e-05	0.000200593	NA	Putative protein of unknown function%3B not an essential gene%3B YNL034W has a paralog%2C YNL018C%2C that arose from a segmental duplication [Source:SGD%3BAcc:S000004979]	XIV	570477	572315	+	855697
2732	YGL183C	115.126	-1.15674	0.364322	0.000151606	0.00130803	MND1	Protein required for recombination and meiotic nuclear division%3B forms a complex with Hop2p%2C which is involved in chromosome pairing and repair of meiotic double-strand breaks [Source:SGD%3BAcc:S000003151]	VII	156543	157285	-	852692
6864	YPL250C	1401.46	-2.36745	0.444034	5.71935e-09	1.79288e-07	ATG41	Protein of unknown function%3B required for selective and nonselective autophagy%2C and mitophagy%3B regulates the rate of autophagosome formation%3B interacts with Atg9p%2C and has a similar peri-mitochondrial localization%3B elevated Gcn4p-dependent ex	XVI	74309	74719	-	855825
5302	YMR096W	2039.84	-1.28528	0.400672	0.000116575	0.00104981	SNZ1	Protein involved in vitamin B6 biosynthesis%3B member of a stationary phase-induced gene family%3B coregulated with SNO1%3B interacts with Sno1p and with Yhr198p%2C perhaps as a multiprotein complex containing other Snz and Sno proteins [Source:SGD%3BAcc	XIII	458408	459301	+	855121
1149	YCR037C	5022.22	-1.35514	0.195118	3.8315e-13	3.19275e-11	PHO87	Low-affinity inorganic phosphate (Pi) transporter%3B acts upstream of Pho81p in regulation of the PHO pathway%3B expression is independent of Pi concentration and Pho4p activity%3B contains 12 membrane-spanning segments%3B PHO87 has a paralog%2C PHO90%2C	III	194414	197185	-	850403
3798	YJL088W	1141.9	-2.46335	1.36246	NA	NA	ARG3	Ornithine carbamoyltransferase%3B also known as carbamoylphosphate:L-ornithine carbamoyltransferase%3B catalyzes the biosynthesis of the arginine precursor citrulline [Source:SGD%3BAcc:S000003624]	X	268799	269815	+	853357
3286	YHR071W	4308	-1.63194	0.333822	7.76153e-08	1.9065e-06	PCL5	Cyclin%3B interacts with and phosphorylated by Pho85p cyclin-dependent kinase (Cdk)%2C induced by Gcn4p at level of transcription%2C specifically required for Gcn4p degradation%2C may be sensor of cellular protein biosynthetic capacity [Source:SGD%3BAcc:	VIII	237004	237693	+	856468
5766	YNL193W	1923.21	-1.17119	0.160429	3.54682e-14	3.76592e-12	NA	Putative protein of unknown function%3B exhibits a two-hybrid interaction with Yhr151cp in a large-scale analysis [Source:SGD%3BAcc:S000005137]	XIV	274368	276044	+	855528
2251	YER069W	3778.98	-2.33434	0.337068	2.7362e-13	2.33928e-11	ARG5%2C6	Acetylglutamate kinase and N-acetyl-gamma-glutamyl-phosphate reductase%3B N-acetyl-L-glutamate kinase (NAGK) catalyzes the 2nd and N-acetyl-gamma-glutamyl-phosphate reductase (NAGSA)%2C the 3rd step in arginine biosynthesis%3B synthesized as a precursor	V	295410	298001	+	856800
2519	YFR035C	565.104	-1.13515	0.422707	0.00069682	0.00471445	NA	Putative protein of unknown function%3B deletion mutant exhibits synthetic phenotype with alpha-synuclein [Source:SGD%3BAcc:S000001931]	VI	226121	226465	-	850595
3785	YJL077C	298.518	-1.30618	0.231749	2.45338e-09	8.63668e-08	ICS3	Protein with a role in copper homeostasis%3B possible role in vacuolar sorting and processing of secretory proteins%3B null mutants are hypersensitive to sortin2 [Source:SGD%3BAcc:S000003613]	X	294666	295061	-	853368

## Sheet: cluster 2 (n=56)
	GeneID	baseMean	log2FoldChange	lfcSE	pvalue	padj	GeneName	Description	Chromosome	Start	Stop	Strand	Entrez_ID
4790	YLR234W	593.946	-1.19551	0.31291	1.39201e-05	0.000175885	TOP3	DNA Topoisomerase III%3B conserved protein that functions in a complex with Sgs1p and Rmi1p to relax single-stranded negatively-supercoiled DNA preferentially%3B DNA catenation/decatenation activity is stimulated by RPA and Sgs1p-Top3p-Rmi1p%3B involved	XII	609783	611753	+	850935
3515	YIL046W-A	57.0826	-1.38791	0.732763	0.00322787	0.0166659	NA	Putative protein of unknown function%3B identified by expression profiling and mass spectrometry [Source:SGD%3BAcc:S000028836]	IX	268309	268473	+	1466492
2283	YER091C	27065.1	-1.30114	1.12951	0.00889716	0.0366292	MET6	Cobalamin-independent methionine synthase%3B involved in methionine biosynthesis and regeneration%3B requires a minimum of two glutamates on the methyltetrahydrofolate substrate%2C similar to bacterial metE homologs [Source:SGD%3BAcc:S000000893]	V	339864	342167	-	856825
5454	YMR232W	629.579	-2.56664	0.360129	6.04692e-14	6.12413e-12	FUS2	Cell fusion regulator%3B cytoplasmic protein localized to shmoo tip%3B required for alignment of parental nuclei before nuclear fusion during mating%3B contains a Dbl-homology domain%3B binds specifically with activated Cdc42p [Source:SGD%3BAcc:S00000484	XIII	736926	738959	+	855272
4563	YLR031W	508.155	-2.74845	0.343981	7.72296e-17	1.18233e-14	NA	Putative protein of unknown function%3B S288C contains an in-frame stop codon between ORFs YLR030W and YLR031W%3B YLR031W has a paralog%2C YMR124W%2C that arose from the whole genome duplication [Source:SGD%3BAcc:S000004021]	XII	204225	204785	+	850718
4562	YLR030W	766.166	-2.49951	0.229881	1.03242e-28	4.24778e-26	NA	Putative protein of unknown function%3B S288C contains an in-frame stop codon between ORFs YLR030W and YLR031W [Source:SGD%3BAcc:S000004020]	XII	203290	204081	+	850717
4145	YKL031W	106.86	-2.43473	0.515786	1.26357e-07	2.97073e-06	NA	Dubious open reading frame%3B unlikely to encode a functional protein%2C based on available experimental and comparative sequence data%3B not conserved in closely related Saccharomyces species [Source:SGD%3BAcc:S000001514]	XI	382072	382485	+	NA
4213	YKL095W	1553	-1.1245	0.228062	1.00751e-07	2.4206e-06	YJU2	Essential protein required for pre-mRNA splicing%3B associates transiently with the spliceosomal NTC (	XI	262277	263113	+	853767
5965	YNR044W	7666.32	-2.2129	0.611274	1.57577e-05	0.000193531	AGA1	Anchorage subunit of a-agglutinin of a-cells%3B highly O-glycosylated protein with N-terminal secretion signal and C-terminal signal for addition of GPI anchor to cell wall%2C linked to adhesion subunit Aga2p via two disulfide bonds%3B AGA1 has a paralog	XIV	703699	705876	+	855780
773	YBR067C	24571.8	-2.0707	0.707083	0.000169495	0.00143787	TIP1	Major cell wall mannoprotein with possible lipase activity%3B transcription is induced by heat- and cold-shock%3B member of the Srp1p/Tip1p family of serine-alanine-rich proteins [Source:SGD%3BAcc:S000000271]	II	372103	372735	-	852359
1060	YCL027W	2635.15	-1.5141	0.348138	1.09951e-06	1.96154e-05	FUS1	Membrane protein localized to the shmoo tip%3B required for cell fusion%3B expression regulated by mating pheromone%3B proposed to coordinate signaling%2C fusion%2C and polarization events required for fusion%3B potential Cdc28p substrate [Source:SGD%3BA	III	71803	73341	+	850330
591	YBL016W	4795.13	-1.01342	0.240733	3.56905e-06	5.36417e-05	FUS3	Mitogen-activated serine/threonine protein kinase involved in mating%3B phosphoactivated by Ste7p%3B substrates include Ste12p%2C Far1p%2C Bni1p%2C Sst2p%3B inhibits invasive growth during mating by phosphorylating Tec1p%2C promoting its%3B inhibits recr	II	192451	193512	+	852265
145	snR82	524.547	-1.09157	0.365264	0.000304032	0.00236334	NA	NA	NA	NA	NA	NA	9164893
3947	YJR004C	31480.7	-1.01652	0.629583	0.00850802	0.0354704	SAG1	Alpha-agglutinin of alpha-cells%3B binds to Aga1p during agglutination%2C N-terminal half is homologous to the immunoglobulin superfamily and contains binding site for a-agglutinin%2C C-terminal half is highly glycosylated and contains GPI anchor [Source	X	442909	444861	-	853460
7048	YPR138C	5678.51	-1.11214	0.261527	2.54819e-06	4.01309e-05	MEP3	Ammonium permease of high capacity and low affinity%3B belongs to a ubiquitous family of cytoplasmic membrane proteins that transport only ammonium (NH4+)%3B expression is under the nitrogen catabolite repression regulation ammonia permease%3B MEP3 has a	XVI	810984	812453	-	856260
4984	YLR410W-B	5101.06	-1.3151	0.289923	5.52397e-07	1.08227e-05	NA	NA	NA	NA	NA	NA	851128
292	tL(CAA)G2	8.33867	-2.3999	2.60334	0.00706642	0.0305755	NA	NA	NA	NA	NA	NA	852843
400	tT(AGU)H	7.69016	-4.21288	2.14983	0.00162164	0.00950651	NA	NA	NA	NA	NA	NA	856396
1283	YDL059C	490.497	-1.06841	0.278597	1.68445e-05	0.00020309	RAD59	Protein involved DNA double-strand break repair%3B repairs breaks in DNA during vegetative growth via recombination and single-strand annealing%3B anneals complementary single-stranded DNA%3B forms nuclear foci upon DNA replication stress%3B required for	IV	344237	344953	-	851500
3593	YIL117C	2272.69	-3.4876	0.263668	3.8538e-41	5.07391e-38	PRM5	Pheromone-regulated protein%2C predicted to have 1 transmembrane segment%3B induced during cell integrity signaling%3B PRM5 has a paralog%2C YNL058C%2C that arose from the whole genome duplication [Source:SGD%3BAcc:S000001379]	IX	140613	141569	-	854689
620	YBL042C	3349.64	-1.69798	0.612223	0.000317103	0.00244436	FUI1	High affinity uridine permease%2C localizes to the plasma membrane%3B also mediates low but significant transport of the cytotoxic nucleoside analog 5-fluorouridine%3B not involved in uracil transport%3B relative distribution to the vacuole increases upo	II	138341	140260	-	852238
5099	YML047C	67.9782	-2.79753	0.967191	0.000348445	0.00264265	PRM6	Potassium transporter that mediates K+ influx%3B activates high-affinity Ca2+ influx system (HACS) during mating pheromone response%3B expression up-regulated in response to alpha factor%3B regulated by Ste12p during mating%3B localized to sites of polar	XIII	180017	181075	-	854959
1414	YDL182W	9022.54	-1.05774	0.62341	0.00695479	0.0301802	LYS20	Homocitrate synthase isozyme and functions in DNA repair%3B catalyzes the condensation of acetyl-CoA and alpha-ketoglutarate to form homocitrate%2C which is the first step in the lysine biosynthesis pathway%3B LYS20 has a paralog%2C LYS21%2C that arose f	IV	133437	134723	+	851346
3872	YJL157C	6463.63	-2.18949	0.267492	1.87267e-17	3.24416e-15	FAR1	CDK inhibitor and nuclear anchor%3B during the cell cycle Far1p sequesters the GEF Cdc24p in the nucleus%3B phosphorylation by Cdc28p-Cln results in SCFCdc4 complex-mediated ubiquitin-dependent degradation%2C releasing Cdc24p for export and activation of	X	123836	126328	-	853283
1089	YCL055W	3145.44	-1.0435	0.24042	1.90623e-06	3.12157e-05	KAR4	Transcription factor required for response to pheromones%3B also required during meiosis%3B exists in two forms%2C a slower-migrating form more abundant during vegetative growth and a faster-migrating form induced by pheromone [Source:SGD%3BAcc:S00000056	III	27929	28936	+	850303
6798	YPL187W	96617.2	-2.48541	0.462955	4.61704e-09	1.49724e-07	MF(ALPHA)1	Mating pheromone alpha-factor%2C made by alpha cells%3B interacts with mating type a cells to induce cell cycle arrest and other responses leading to mating%3B also encoded by MF(ALPHA)2%2C although MF(ALPHA)1 produces most alpha-factor%3B binds copper(I	XVI	193648	194145	+	855914
308	tL(UAG)L1	51.4316	-2.57808	0.754508	2.97957e-05	0.000334719	NA	NA	NA	NA	NA	NA	850925
4215	YKL096W	1946.33	-3.431	0.490109	1.37146e-13	1.28976e-11	CWP1	Cell wall mannoprotein that localizes to birth scars of daughter cells%3B linked to a beta-1%2C3- and beta-1%2C6-glucan heteropolymer through a phosphodiester bond%3B required for propionic acid resistance [Source:SGD%3BAcc:S000001579]	XI	261132	261851	+	853766
3214	YHR014W	130.322	-1.58934	0.384811	2.66656e-06	4.14008e-05	SPO13	Meiotic regulator%3B involved in maintaining sister chromatid cohesion during meiosis I as well as promoting proper attachment of kinetochores to the spindle during meiosis I and meiosis II%3B anaphase-promoting complex (APC) substrate that is degraded d	VIII	132047	132922	+	856405
5531	YMR303C	3348.61	-3.16487	0.517817	5.26247e-11	2.93584e-09	ADH2	Glucose-repressible alcohol dehydrogenase II%3B catalyzes the conversion of ethanol to acetaldehyde%3B involved in the production of certain carboxylate esters%3B regulated by ADR1 [Source:SGD%3BAcc:S000004918]	XIII	873291	874337	-	855349
189	tD(GUC)N	54.7692	-2.29633	0.705979	5.8232e-05	0.00058885	NA	NA	NA	NA	NA	NA	855670
1125	YCR018C	1442.19	-1.28565	0.342624	1.63617e-05	0.000199831	SRD1	Protein involved in the processing of pre-rRNA to mature rRNA%3B contains a C2/C2 zinc finger motif%3B srd1 mutation suppresses defects caused by the rrp1-1 mutation [Source:SGD%3BAcc:S000000611]	III	148238	148903	-	850377
4758	YLR205C	713.886	-1.5842	0.199329	1.66966e-16	2.49804e-14	HMX1	ER localized heme oxygenase%3B involved in heme degradation during iron starvation and in the oxidative stress response%3B expression is regulated by AFT1 and oxidative stress%3B relocates to the perinuclear region in the presence of oxidants [Source:SGD	XII	552724	553677	-	850902
5330	YMR122C	364.668	-1.34611	0.281203	2.989e-07	6.3885e-06	NA	Putative protein of unknown function%3B conserved among S. cerevisiae strains%3B YMR122C is not an essential gene [Source:SGD%3BAcc:S000004729]	XIII	510701	511075	-	855151
3524	YIL054W	44.1082	-2.29799	0.706673	6.43449e-05	0.000640821	NA	Protein of unknown function%3B expressed at both mRNA and protein levels [Source:SGD%3BAcc:S000001316]	IX	254543	254860	+	854757
265	tI(UAU)L	5.03097	-6.45004	2.90794	6.68567e-05	0.000660837	NA	NA	NA	NA	NA	NA	850931
2151	YEL065W	9561.16	-2.66805	0.379641	1.23952e-13	1.18257e-11	SIT1	Ferrioxamine B transporter%3B member of the ARN family of transporters that specifically recognize siderophore-iron chelates%3B transcription is induced during iron deprivation and diauxic shift%3B potentially phosphorylated by Cdc28p [Source:SGD%3BAcc:S	V	27657	29543	+	856644
4946	YLR376C	829.631	-1.02292	0.224309	7.18343e-07	1.35497e-05	PSY3	Component of Shu complex (aka PCSS complex)%3B Shu complex also includes Shu1%2C Csm2%2C Shu2%2C and promotes error-free DNA repair%3B promotes Rad51p filament assembly%3B Shu complex mediates inhibition of Srs2p function%3B Psy3p and Csm2p contain simil	XII	872826	873554	-	851091
4341	YKL216W	42561.9	-1.46061	0.232363	2.98347e-11	1.81854e-09	URA1	Dihydroorotate dehydrogenase%3B catalyzes the fourth enzymatic step in the de novo biosynthesis of pyrimidines%2C converting dihydroorotic acid into orotic acid [Source:SGD%3BAcc:S000001699]	XI	25215	26159	+	853664
371	tR(UCU)G3	49.4726	-3.69507	0.870182	1.07255e-06	1.91864e-05	NA	NA	NA	NA	NA	NA	853022
5474	YMR251W	521.776	-2.13501	0.36903	4.56745e-10	1.91838e-08	GTO3	Omega class glutathione transferase%3B putative cytosolic localization [Source:SGD%3BAcc:S000004863]	XIII	772915	774015	+	855292
2142	YEL057C	594.213	-3.17789	0.376402	1.63539e-18	3.07594e-16	SDD1	Protein of unknown function%3B overproduction suppresses lethality due to expression of the dominant PET9 allele AAC2-A128P%3B may have a role in telomere maintenance%3B target of UME6 regulation [Source:SGD%3BAcc:S000000783]	V	45020	45721	-	856653
6891	YPL274W	6111.62	-2.04207	0.573699	2.07058e-05	0.000241677	SAM3	High-affinity S-adenosylmethionine permease%3B required for utilization of S-adenosylmethionine as a sulfur source%3B has similarity to S-methylmethionine permease Mmp1p [Source:SGD%3BAcc:S000006195]	XVI	22938	24701	+	855854
6796	YPL185W	137.728	-1.50908	0.41984	2.36261e-05	0.000270488	NA	Dubious open reading frame%3B unlikely to encode a functional protein%2C based on available experimental and comparative sequence data%3B partially overlaps the verified gene UIP4/YPL186C [Source:SGD%3BAcc:S000006106]	XVI	195253	195648	+	NA
2145	YEL059W	109.398	-1.87154	0.689661	0.00033696	0.00257632	HHY1	Dubious open reading frame unlikely to encode a functional protein%3B mutant is hypersensitive to hygromycin B indicative of defects in vacuolar trafficking [Source:SGD%3BAcc:S000000785]	V	42652	42960	+	NA
1026	YBR296C-A	100.485	-2.70296	0.584648	2.36754e-07	5.14374e-06	NA	Putative protein of unknown function%3B identified by gene-trapping%2C microarray-based expression analysis%2C and genome-wide homology searching [Source:SGD%3BAcc:S000028605]	II	800123	800242	-	1466451
6985	YPR078C	173.615	-2.57612	0.327532	2.39154e-16	3.2799e-14	NA	Putative protein of unknown function%3B possible role in DNA metabolism and/or in genome stability%3B expression is heat-inducible [Source:SGD%3BAcc:S000006282]	XVI	697147	698265	-	856193
6464	YOR268C	33.2722	-1.45101	1.30348	0.00778908	0.0329958	NA	Putative protein of unknown function%3B sporulation is abnormal in homozygous diploid%3B SWAT-GFP fusion protein localizes to the nucleus%3B YOR268C is not an essential gene [Source:SGD%3BAcc:S000005794]	XV	825534	825932	-	854442
3142	YHL005C	9.40763	-2.50052	1.21447	0.00200868	0.0112823	NA	Putative protein of unknown function%3B conserved among S. cerevisiae strains%3B YHL005C is not an essential gene [Source:SGD%3BAcc:S000000997]	VIII	98828	99220	-	856385
4936	YLR366W	42.4954	-2.08265	0.655978	7.81869e-05	0.000760272	NA	Dubious open reading frame%3B unlikely to encode a functional protein%2C based on available experimental and comparative sequence data%3B partially overlaps the dubious ORF YLR364C-A [Source:SGD%3BAcc:S000004358]	XII	855538	855843	+	NA
2313	YER119C-A	17.9374	-1.60534	0.941727	0.00380086	0.0189985	NA	Dubious open reading frame%3B unlikely to encode a functional protein%2C based on available experimental and comparative sequence data%3B not conserved in closely related Saccharomyces species%3B deletion mutation blocks replication of Brome mosaic virus	V	400867	401238	-	NA
6014	YOL013W-B	18.623	-1.67311	1.19658	0.00547978	0.0252792	YOL013W-B	Dubious open reading frame%3B unlikely to encode a functional protein%2C based on available experimental and comparative sequence data%3B completely overlaps the long terminal repeat (LTR) of a Ty1 element [Source:SGD%3BAcc:S000007252]	XV	300690	300980	+	NA
563	YAR061W	156.117	-1.10479	0.427746	0.000974182	0.00625053	NA	NA	NA	NA	NA	NA	851292
3445	YHR212W-A	50.0463	-1.11026	0.586608	0.00481762	0.0228654	NA	Pseudogenic fragment with similarity to flocculins%3B identified by gene-trapping%2C microarray-based expression analysis%2C and genome-wide homology searching%3B SWAT-GFP%2C seamless-GFP and mCherry fusion proteins localize to the endoplasmic reticulum%	VIII	538742	538945	+	1466531
3222	YHR021W-A	95.1531	-1.18912	0.676039	0.00503858	0.0237091	ECM12	Putative protein of unknown function%3B may contribute to cell wall biosynthesis%2C mutants display zymolyase hypersensitivity [Source:SGD%3BAcc:S000003531]	VIII	149225	149680	+	856416
6193	YOR011W-A	31.2487	-1.25223	0.670141	0.00411699	0.020286	NA	Putative protein of unknown function [Source:SGD%3BAcc:S000028581]	XV	355652	355858	+	1466479

## Sheet: cluster 3 (n=132)
	GeneID	baseMean	log2FoldChange	lfcSE	pvalue	padj	GeneName	Description	Chromosome	Start	Stop	Strand	Entrez_ID
5107	YML054C	24343	-3.61531	0.39723	4.82462e-21	1.09519e-18	CYB2	Cytochrome b2 (L-lactate cytochrome-c oxidoreductase)%3B component of the mitochondrial intermembrane space%2C required for lactate utilization%3B expression is repressed by glucose and anaerobic conditions [Source:SGD%3BAcc:S000004518]	XIII	165533	167308	-	854950
6836	YPL223C	7202.49	-3.60114	0.372608	2.31988e-23	6.94172e-21	GRE1	Hydrophilin essential in desiccation-rehydration process%3B stress induced (osmotic%2C ionic%2C oxidative%2C heat shock and heavy metals)%3B regulated by the HOG pathway%3B GRE1 has a paralog%2C SIP18%2C that arose from the whole genome duplication [Sour	XVI	128632	129138	-	855878
5556	YMR322C	528.691	-3.30748	0.560949	6.30085e-10	2.57135e-08	SNO4	Possible chaperone and cysteine protease%3B required for transcriptional reprogramming during the diauxic shift and for survival in stationary phase%3B similar to bacterial Hsp31 and yeast Hsp31p%2C Hsp32p%2C and Hsp33p%3B DJ-1/ThiJ/PfpI superfamily memb	XIII	918366	919079	-	855372
4182	YKL065W-A	7652.1	-3.04839	0.35188	2.55807e-19	5.26242e-17	DPC7	Putative protein of unknown function%3B SWAT-GFP fusion protein localizes to the endoplasmic reticulum (ER) while mCherry fusion localizes to both the ER and vacuole [Source:SGD%3BAcc:S000113563]	XI	315954	316175	+	3799975
4876	YLR312C	3835.42	-2.81694	0.291463	2.47583e-23	7.08625e-21	ATG39	Autophagy receptor with a role in degradation of the ER and nucleus%3B involved specifically in autophagy of perinuclear endoplasmic reticulum in response to nitrogen starvation or rapamycin treatment%3B localizes to the perinuclear ER [Source:SGD%3BAcc:	XII	757637	758833	-	851021
6897	YPL280W	1326.3	-2.80025	0.301494	1.51124e-21	3.55304e-19	HSP32	Possible chaperone and cysteine protease%3B required for transcriptional reprogramming during the diauxic shift and for survival in stationary phase%3B similar to E. coli Hsp31 and S. cerevisiae Hsp31p%2C Hsp33p%2C and Sno4p%3B member of the DJ-1/ThiJ/Pf	XVI	11887	12600	+	855849
3072	YGR236C	10757	-2.75526	0.37287	8.30682e-15	9.59365e-13	SPG1	Protein required for high temperature survival during stationary phase%3B not required for growth on nonfermentable carbon sources%3B the authentic%2C non-tagged protein is detected in highly purified mitochondria in high-throughput studies [Source:SGD%3	VII	962530	962817	-	853151
5391	YMR175W	23438.5	-2.68803	0.612381	5.64231e-07	1.09892e-05	SIP18	Phospholipid-binding hydrophilin%3B essential to overcome desiccation-rehydration process%3B expression is induced by osmotic stress%3B SIP18 has a paralog%2C GRE1%2C that arose from the whole genome duplication [Source:SGD%3BAcc:S000004787]	XIII	611016	611255	+	855213
6899	YPL282C	38.1535	-2.5725	1.10312	0.00297563	0.0155634	PAU22	Protein of unknown function%3B member of the seripauperin multigene family encoded mainly in subtelomeric regions%3B SWAT-GFP fusion protein localizes to the endoplasmic reticulum and vacuole%2C while mCherry fusion localizes to just the vacuole%3B ident	XVI	7933	8427	-	855847
4706	YLR157W-D	39.7036	-2.56352	0.475245	4.83939e-09	1.56165e-07	YLR157W-D	Putative protein of unknown function%3B identified by gene-trapping%2C microarray-based expression analysis%2C and genome-wide homology searching%3B YLR157W-D has a paralog%2C YLR161W%2C that arose from a segmental duplication [Source:SGD%3BAcc:S00002867	XII	475764	475976	+	1466412
2290	YER096W	2602.91	-2.45291	0.21713	8.62266e-31	3.7842e-28	SHC1	Sporulation-specific activator of Chs3p (chitin synthase III)%3B required for the synthesis of the chitosan layer of ascospores%3B transcriptionally induced at alkaline pH%3B SHC1 has a paralog%2C SKT5%2C that arose from the whole genome duplication [Sou	V	351698	353236	+	856832
4712	YLR161W	351.891	-2.37381	0.248157	5.2462e-23	1.43899e-20	YLR161W	Putative protein of unknown function%3B YLR156W%2C YLR159W%2C and YLR161W are three identical open reading frames in S288C encoded near the ribosomal DNA region of chromosome 12%3B YLR161W has a paralog%2C YLR157W-D%2C that arose from a segmental duplica	XII	488997	489341	+	850858
2814	YGL261C	85.698	-2.31225	0.715547	6.09056e-05	0.00061306	PAU11	Putative protein of unknown function%3B member of the seripauperin multigene family encoded mainly in subtelomeric regions%3B mRNA expression appears to be regulated by SUT1 and UPC2 [Source:SGD%3BAcc:S000003230]	VII	6290	6652	-	852630
2813	YGL260W	52.9319	-2.19817	0.915709	0.000758333	0.00507328	YGL260W	Putative protein of unknown function%3B transcription is significantly increased in a NAP1 deletion background%3B deletion mutant has increased accumulation of nickel and selenium [Source:SGD%3BAcc:S000003229]	VII	6860	7090	+	852631
5390	YMR174C	11347.4	-2.13486	0.266092	6.75612e-17	1.05894e-14	PAI3	Cytoplasmic proteinase A (Pep4p) inhibitor%3B dependent on Pbs2p and Hog1p protein kinases for osmotic induction%3B intrinsically unstructured%2C N-terminal half becomes ordered in the active site of proteinase A upon contact [Source:SGD%3BAcc:S000004786	XIII	610159	610365	-	855212
2756	YGL205W	1695.51	-2.04258	0.3807	5.17864e-09	1.64691e-07	POX1	Fatty-acyl coenzyme A oxidase%3B involved in the fatty acid beta-oxidation pathway%3B localized to the peroxisomal matrix [Source:SGD%3BAcc:S000003173]	VII	108158	110404	+	852667
4359	YKR009C	6924.62	-2.01815	0.192046	5.6649e-27	2.07178e-24	FOX2	3-hydroxyacyl-CoA dehydrogenase and enoyl-CoA hydratase%3B multifunctional enzyme of the peroxisomal fatty acid beta-oxidation pathway%3B mutation is functionally complemented by human HSD17B4 [Source:SGD%3BAcc:S000001717]	XI	454352	457054	-	853878
4717	YLR164W	2856.36	-1.99559	0.202598	4.98954e-24	1.72874e-21	SHH4	Putative alternate subunit of succinate dehydrogenase (SDH)%3B mitochondrial inner membrane protein%3B genetic interaction with SDH4 suggests that Shh4p can function as a functional SDH subunit%3B a fraction copurifies with SDH subunit Sdh3p%3B expressio	XII	493883	494389	+	850861
3362	YHR139C	1365.41	-1.98998	0.21004	2.01361e-22	5.09831e-20	SPS100	Protein required for spore wall maturation%3B expressed during sporulation%3B may be a component of the spore wall%3B expression also induced in cells treated with the mycotoxin patulin%3B SPS100 has a paralog%2C YGP1%2C that arose from the whole genome	VIII	378219	379199	-	856541
6598	YOR391C	1334.49	-1.96759	0.323703	1.18216e-10	6.03269e-09	HSP33	Possible chaperone and cysteine protease%3B required for transcriptional reprogramming during the diauxic shift and for survival in stationary phase%3B similar to E. coli Hsp31 and S. cerevisiae Hsp31p%2C Hsp32p%2C and Sno4p%3B member of the DJ-1/ThiJ/Pf	XV	1078545	1079258	-	854573
4710	YLR159W	199.7	-1.9633	0.2414	3.23793e-17	5.32882e-15	YLR159W	Putative protein of unknown function%3B YLR156W%2C YLR159W%2C and YLR161W are three identical open reading frames in S288C encoded near the ribosomal DNA region of chromosome 12%3B YLR159W has a paralog%2C YLR156W%2C that arose from a segmental duplicati	XII	485345	485689	+	850856
5920	YNR002C	4171.13	-1.95946	0.282299	2.71035e-13	2.33928e-11	ATO2	Putative transmembrane protein involved in export of ammonia%3B ammonia is a starvation signal that promotes cell death in aging colonies%3B phosphorylated in mitochondria%3B member of the TC 9.B.33 YaaH family%3B homolog of Y. lipolytica Gpr1p%3B ATO2 h	XIV	633008	633856	-	855736
2230	YER053C-A	4553.72	-1.94022	0.399079	7.60971e-08	1.87621e-06	YER053C-A	Protein of unknown function%3B green fluorescent protein (GFP)-fusion protein localizes to the endoplasmic reticulum%3B protein abundance increases in response to DNA replication stress [Source:SGD%3BAcc:S000007523]	V	260933	261046	-	856780
3633	YIL155C	17191.2	-1.94	0.164328	2.70596e-33	1.97926e-30	GUT2	Mitochondrial glycerol-3-phosphate dehydrogenase%3B expression is repressed by both glucose and cAMP and derepressed by non-fermentable carbon sources in a Snf1p%2C Rsf1p%2C Hap2/3/4/5 complex dependent manner [Source:SGD%3BAcc:S000001417]	IX	51759	53708	-	854651
6942	YPR036W-A	103005	-1.85144	0.671315	0.00030162	0.00234978	SPO24	Small (67 amino acids) protein involved in sporulation%3B localizes to the prospore membrane%3B phosphorylated during meiosis%3B a longer%2C 5'-extended mRNA is also transcribed beginning in mid-meiosis%2C regulated by two MSEs (middle sporulation elemen	XVI	645950	646153	+	856149
6659	YPL054W	4071.36	-1.83804	0.43079	1.27807e-06	2.23763e-05	LEE1	Zinc-finger protein of unknown function [Source:SGD%3BAcc:S000005975]	XVI	455759	456664	+	856053
6742	YPL134C	12026.7	-1.83515	0.170239	3.31314e-28	1.28296e-25	ODC1	Mitochondrial inner membrane transporter%3B 2-oxodicarboxylate transporter%2C exports 2-oxoadipate and 2-oxoglutarate from the mitochondrial matrix to the cytosol for lysine and glutamate biosynthesis and lysine catabolism%3B suppresses%2C in multicopy%2	XVI	298571	299503	-	855969
6089	YOL084W	3369.27	-1.8274	0.309366	2.46094e-10	1.14134e-08	PHM7	Protein of unknown function%3B expression is regulated by phosphate levels%3B green fluorescent protein (GFP)-fusion protein localizes to the cell periphery and vacuole%3B protein abundance increases in response to DNA replication stress [Source:SGD%3BAc	XV	162356	165331	+	854070
2644	YGL096W	2062.04	-1.81087	0.159981	8.23762e-31	3.7842e-28	TOS8	Homeodomain-containing protein and putative transcription factor%3B found associated with chromatin%3B target of SBF transcription factor%3B induced during meiosis and under cell-damaging conditions%3B TOS8 has a paralog%2C CUP9%2C that arose from the wh	VII	325331	326161	+	852783
4875	YLR311C	262.489	-1.7241	0.43521	5.09104e-06	7.25418e-05	NA	Dubious open reading frame%3B unlikely to encode a functional protein%2C based on available experimental and comparative sequence data [Source:SGD%3BAcc:S000004302]	XII	757265	757612	-	NA
1310	YDL085W	9742.71	-1.72408	0.272617	1.93068e-11	1.21044e-09	NDE2	Mitochondrial external NADH dehydrogenase%3B catalyzes the oxidation of cytosolic NADH%3B Nde1p and Nde2p are involved in providing the cytosolic NADH to the mitochondrial respiratory chain%3B NDE2 has a paralog%2C NDE1%2C that arose from the whole genom	IV	303211	304848	+	851474
2426	YFL019C	511.633	-1.70066	0.378486	5.46845e-07	1.07459e-05	NA	Putative protein of unknown function%3B conserved across S. cerevisiae strains%3B YFL019C is not an essential gene [Source:SGD%3BAcc:S000001875]	VI	100252	100605	-	850525
3087	YGR250C	14369.5	-1.6681	0.330273	3.30132e-08	8.72795e-07	RIE1	Putative RNA binding protein%3B localizes to stress granules induced by glucose deprivation%3B interacts with Rbg1p in a two-hybrid assay%3B protein abundance increases in response to DNA replication stress [Source:SGD%3BAcc:S000003482]	VII	991176	993521	-	853165
7062	YPR151C	236.914	-1.65518	0.315994	1.28191e-08	3.734e-07	SUE1	Protein required for degradation of unstable forms of cytochrome c%3B located in the mitochondria [Source:SGD%3BAcc:S000006355]	XVI	831055	831675	-	856274
4701	YLR156W	97.8341	-1.62757	0.339249	1.34717e-07	3.15603e-06	NA	Putative protein of unknown function%3B exhibits a two-hybrid interaction with Jsn1p in a large-scale analysis%3B YLR156W has a paralog%2C YLR159W%2C that arose from a segmental duplication [Source:SGD%3BAcc:S000004146]	XII	472113	472457	+	850851
2389	YER181C	15.6927	-1.58174	1.86513	0.00924827	0.0377208	NA	Mitochondrial protein of unknown function%3B conserved among S. cerevisiae strains%3B extensively overlaps a Ty1 LTR%3B YER181C is not an essential gene [Source:SGD%3BAcc:S000000983]	V	551473	551796	-	856930
793	YBR085C-A	15959.6	-1.56149	0.249657	3.34921e-11	2.00435e-09	NA	Protein of unknown function%3B green fluorescent protein (GFP)-fusion protein localizes to the cytoplasm and to the nucleus%3B protein abundance increases in response to DNA replication stress [Source:SGD%3BAcc:S000007522]	II	418907	419164	-	852381
4400	YKR049C	7092.04	-1.52004	0.186999	3.90131e-17	6.26398e-15	FMP46	Putative redox protein containing a thioredoxin fold%3B the authentic%2C non-tagged protein is detected in highly purified mitochondria in high-throughput studies [Source:SGD%3BAcc:S000001757]	XI	526830	527231	-	853923
1719	YDR216W	10385.9	-1.50665	0.229224	4.34505e-12	2.93296e-10	ADR1	Carbon source-responsive zinc-finger transcription factor%3B required for transcription of the glucose-repressed gene ADH2%2C of peroxisomal protein genes%2C and of genes required for ethanol%2C glycerol%2C and fatty acid utilization [Source:SGD%3BAcc:S0	IV	895035	899006	+	851802
6910	YPR007C	613.221	-1.50574	0.249056	1.89762e-10	9.0522e-09	REC8	Meiosis-specific component of the sister chromatid cohesion complex%3B alpha-kleisin family member that maintains cohesion between sister chromatids during meiosis I%3B maintains cohesion between centromeres of sister chromatids until meiosis II%3B indep	XVI	569336	571378	-	856115
6050	YOL047C	1101.28	-1.49995	0.626528	0.000979701	0.00627982	LDS2	Protein Involved in spore wall assembly%3B localizes to lipid droplets found on or outside of the prospore membrane%3B shares similarity with Lds1p and Rrt8p%2C and a strain mutant for all 3 genes exhibits reduced dityrosine fluorescence relative to the	XV	241614	242747	-	854110
1027	YBR297W	4599.29	-1.49907	0.37984	6.13163e-06	8.56997e-05	MAL33	MAL-activator protein%3B part of complex locus MAL3%3B nonfunctional in genomic reference strain S288C [Source:SGD%3BAcc:S000000501]	II	800523	801929	+	852600
2669	YGL121C	7013.01	-1.49778	0.242196	5.50581e-11	3.0204e-09	GPG1	Proposed gamma subunit of the heterotrimeric G protein%3B interacts with the receptor Gpr1p%3B involved in regulation of pseudohyphal growth%3B requires Gpb1p or Gpb2p to interact with Gpa2p%3B overproduction causes prion curing [Source:SGD%3BAcc:S000003	VII	280777	281157	-	852756
5206	YMR008C	8990.01	-1.48137	0.205625	5.29866e-14	5.45017e-12	PLB1	Phospholipase B (lysophospholipase) involved in lipid metabolism%3B required for efficient acyl chain remodeling of newly synthesized phosphatidylethanolamine-derived phosphatidylcholine%3B required for deacylation of phosphatidylcholine and phosphatidyl	XIII	280590	282584	-	855020
4838	YLR279W	284.952	-1.47626	0.348365	1.86054e-06	3.06965e-05	NA	Dubious open reading frame%3B unlikely to encode a functional protein%2C based on available experimental and comparative sequence data [Source:SGD%3BAcc:S000004269]	XII	704309	704698	+	NA
956	YBR230C	27920.9	-1.47517	0.318798	3.0818e-07	6.56553e-06	OM14	Mitochondrial outer membrane receptor for cytosolic ribosomes%3B integral protein of the outer membrane that interacts with the nascent chain-associated complex (NAC) bound to ribosomes%2C contributing to co-translational mitochondrial import%3B interact	II	679549	680050	-	852531
6898	YPL281C	1074.87	-1.45511	0.465266	0.000132102	0.00116886	ERR2	Enolase%2C a phosphopyruvate hydratase%3B catalyzes the conversion of 2-phosphoglycerate to phosphoenolpyruvate%3B complements the growth defect of an ENO1 ENO2 double mutant [Source:SGD%3BAcc:S000006202]	XVI	9557	10870	-	855848
6600	YOR393W	1029.48	-1.42299	0.547764	0.000639814	0.00442426	ERR1	Putative phosphopyruvate hydratase [Source:SGD%3BAcc:S000005920]	XV	1080276	1081589	+	854575
3640	YIL160C	12269.6	-1.42022	0.499762	0.000316754	0.00244436	POT1	3-ketoacyl-CoA thiolase with broad chain length specificity%3B cleaves 3-ketoacyl-CoA into acyl-CoA and acetyl-CoA during beta-oxidation of fatty acids [Source:SGD%3BAcc:S000001422]	IX	40191	41444	-	854646
4689	YLR152C	3221.19	-1.40704	0.190095	1.30264e-14	1.4785e-12	NA	Putative protein of unknown function%3B YLR152C is not an essential gene [Source:SGD%3BAcc:S000004142]	XII	442958	444688	-	850845
1455	YDL222C	17075.4	-1.38302	0.648077	0.00194699	0.0110017	FMP45	Integral membrane protein localized to mitochondria%3B required for sporulation and maintaining sphingolipid content%3B similar to SUR7%3B FMP45 has a paralog%2C YNL194C%2C that arose from the whole genome duplication [Source:SGD%3BAcc:S000002381]	IV	60872	61801	-	851304
5472	YMR247W-A	206.884	-1.36658	0.28889	2.14301e-07	4.73405e-06	NA	Putative protein of unknown function%3B SWAT-GFP fusion protein localizes to the endoplasmic reticulum and vacuole%2C while mCherry fusion localizes to just the vacuole [Source:SGD%3BAcc:S000028849]	XIII	769283	769426	+	1466506
721	YBR018C	509.394	-1.36635	0.23799	9.17299e-10	3.59439e-08	GAL7	Galactose-1-phosphate uridyl transferase%3B synthesizes glucose-1-phosphate and UDP-galactose from UDP-D-glucose and alpha-D-galactose-1-phosphate in the second step of galactose catabolism%3B human homolog UGP2 can complement yeast null mutant [Source:S	II	274427	275527	-	852306
3851	YJL137C	5400.61	-1.34417	0.228974	4.29692e-10	1.82494e-08	GLG2	Glycogenin glucosyltransferase%3B self-glucosylating initiator of glycogen synthesis%2C also glucosylates n-dodecyl-beta-D-maltoside%3B similar to mammalian glycogenin%3B GLG2 has a paralog%2C GLG1%2C that arose from the whole genome duplication [Source:	X	154985	156127	-	853304
1401	YDL169C	3593.61	-1.34388	0.310538	1.3676e-06	2.36919e-05	UGX2	Protein of unknown function%3B transcript accumulates in response to any combination of stress conditions [Source:SGD%3BAcc:S000002328]	IV	158064	158735	-	851385
5506	YMR280C	6684.49	-1.34287	0.193531	4.03677e-13	3.28075e-11	CAT8	Zinc cluster transcriptional activator%3B necessary for derepression of a variety of genes under non-fermentative growth conditions%2C active after diauxic shift%2C binds carbon source responsive elements%3B relative distribution to the nucleus increases	XIII	827028	831329	-	855323
2381	YER175C	4278.69	-1.329	0.260147	3.16535e-08	8.54383e-07	TMT1	Trans-aconitate methyltransferase%3B cytosolic enzyme that catalyzes the methyl esterification of 3-isopropylmalate%2C an intermediate of the leucine biosynthetic pathway%2C and trans-aconitate%2C which inhibits the citric acid cycle [Source:SGD%3BAcc:S0	V	539464	540363	-	856922
3706	YIR041W	59.043	-1.30994	0.596874	0.00250479	0.0136048	PAU15	Protein of unknown function%3B member of the seripauperin multigene family encoded mainly in subtelomeric regions%3B SWAT-GFP and mCherry fusion proteins localize to the vacuole [Source:SGD%3BAcc:S000001480]	IX	433929	434303	+	854859
522	YAL061W	20074.3	-1.30648	0.217823	2.05234e-10	9.65039e-09	BDH2	Putative medium-chain alcohol dehydrogenase with similarity to BDH1%3B transcription induced by constitutively active PDR1 and PDR3 [Source:SGD%3BAcc:S000000057]	I	33448	34701	+	851238
6931	YPR026W	7409.56	-1.30158	0.227094	1.02047e-09	3.86077e-08	ATH1	Acid trehalase required for utilization of extracellular trehalose%3B involved in intracellular trehalose degradation during growth recovery after saline stress [Source:SGD%3BAcc:S000006230]	XVI	615379	619014	+	856137
1083	YCL049C	4316.61	-1.30148	0.308821	2.3795e-06	3.802e-05	NA	Protein of unknown function%3B localizes to membrane fraction%3B YCL049C is not an essential gene [Source:SGD%3BAcc:S000000554]	III	39786	40724	-	850308
3789	YJL079C	17547.2	-1.29102	0.469231	0.000470709	0.00342017	PRY1	Sterol binding protein involved in the export of acetylated sterols%3B secreted glycoprotein and member of the CAP protein superfamily (cysteine-rich secretory proteins (CRISP)%2C antigen 5%2C and pathogenesis related 1 proteins)%3B sterol export functio	X	289875	290774	-	853366
3081	YGR244C	21935.1	-1.28932	0.258251	6.01077e-08	1.52776e-06	LSC2	Beta subunit of succinyl-CoA ligase%3B succinyl-CoA ligase is a mitochondrial enzyme of the TCA cycle that catalyzes the nucleotide-dependent conversion of succinyl-CoA to succinate [Source:SGD%3BAcc:S000003476]	VII	978036	979319	-	853159
6756	YPL147W	3081.41	-1.26002	0.158301	1.94199e-16	2.84092e-14	PXA1	Subunit of heterodimeric peroxisomal ABC transport complex%2C with Pxa2p%3B required for import of long-chain fatty acids into peroxisomes%3B similar to human adrenoleukodystrophy transporters ABCD1and ABCD2%2C and ALD-related proteins%3B mutations in AB	XVI	273255	275867	+	855956
6481	YOR285W	14502.7	-1.24915	0.242575	2.77392e-08	7.57705e-07	RDL1	Thiosulfate sulfurtransferase%3B contains a rhodanese-like domain%3B localized to the mitochondrial outer membrane%3B protein abundance increases in response to DNA replication stress%3B similar to the human TSTD gene [Source:SGD%3BAcc:S000005811]	XV	849635	850054	+	854459
6919	YPR015C	1481.3	-1.24887	0.319753	9.14622e-06	0.000122555	NA	Putative zinc finger transcription factor%3B binds DNA in sequence-specific manner%3B overexpression causes a cell cycle delay or arrest [Source:SGD%3BAcc:S000006219]	XVI	590283	591026	-	856125
6602	YOR394W	35.9015	-1.2391	1.55678	0.0220668	0.0747637	PAU21	Protein of unknown function%3B member of the seripauperin multigene family encoded mainly in subtelomeric regions%3B SWAT-GFP%2C seamless-GFP and mCherry fusion proteins localize to the cytosol%3B identical to Pau22p%3B encodes two proteins that are tran	XV	1082718	1083212	+	854576
1447	YDL214C	3856.82	-1.23771	0.443884	0.000449038	0.00329912	PRR2	Serine/threonine protein kinase%3B inhibits pheromone induced signalling downstream of MAPK%2C possibly at the level of the Ste12p transcription factor%3B mutant has increased aneuploidy tolerance%3B PRR2 has a paralog%2C NPR1%2C that arose from the whol	IV	74446	76545	-	851312
4343	YKL218C	3046.4	-1.23556	0.197151	4.10941e-11	2.394e-09	SRY1	3-hydroxyaspartate dehydratase%3B deaminates L-threo-3-hydroxyaspartate to form oxaloacetate and ammonia%3B required in the presence of hydroxyaspartate%3B highly similar to mouse serine racemase (Srr) but has no serine racemase activity [Source:SGD%3BAc	XI	17359	18339	-	853662
927	YBR203W	2492.7	-1.21891	0.322304	1.55836e-05	0.000191752	COS111	Protein required for antifungal drug ciclopirox olamine resistance%3B not related to the subtelomerically-encoded COS family%3B the authentic%2C non-tagged protein is detected in highly purified mitochondria in high-throughput studies [Source:SGD%3BAcc:S	II	629168	631942	+	852502
3525	YIL055C	2453.73	-1.19904	0.191031	4.04675e-11	2.37855e-09	NA	Putative protein of unknown function [Source:SGD%3BAcc:S000001317]	IX	252042	253925	-	854756
2438	YFL030W	22791.8	-1.19606	0.389153	0.000198558	0.00164831	AGX1	Alanine:glyoxylate aminotransferase (AGT)%3B catalyzes the synthesis of glycine from glyoxylate%2C which is one of three pathways for glycine biosynthesis in yeast%3B similar to mammalian and plant alanine:glyoxylate aminotransferases%3B human homolog AG	VI	76831	77988	+	850514
6164	YOL155C	16874.6	-1.18726	0.207632	1.25315e-09	4.58304e-08	HPF1	Haze-protective mannoprotein%3B reduces the particle size of aggregated proteins in white wines [Source:SGD%3BAcc:S000005515]	XV	28703	31606	-	854010
2330	YER135C	79.4527	-1.18344	0.462014	0.000923772	0.00598542	NA	Putative protein of unknown function%3B conserved among S. cerevisiae strains%3B YER135C is not an essential gene [Source:SGD%3BAcc:S000000937]	V	437952	438344	-	856874
6088	YOL083W	3026.36	-1.17833	0.257684	5.36141e-07	1.06308e-05	ATG34	Receptor protein involved in selective autophagy during starvation%3B specifically involved in the transport of cargo protein alpha-mannosidase (Ams1p)%3B Atg19p paralog [Source:SGD%3BAcc:S000005443]	XV	165714	166952	+	854071
627	YBL049W	3735.47	-1.17315	0.294302	7.25008e-06	9.98478e-05	MOH1	Protein of unknown function%2C essential for stationary phase survival%3B not required for growth on nonfermentable carbon sources%3B possibly linked with vacuolar transport [Source:SGD%3BAcc:S000000145]	II	126828	127244	+	852231
5094	YML042W	24521.1	-1.15739	0.642507	0.00488139	0.0231181	CAT2	Carnitine acetyl-CoA transferase%3B present in both mitochondria and peroxisomes%3B transfers activated acetyl groups to carnitine to form acetylcarnitine which can be shuttled across membranes [Source:SGD%3BAcc:S000004506]	XIII	192788	194800	+	854965
3175	YHL032C	12181.6	-1.14271	0.202063	1.90937e-09	6.83119e-08	GUT1	Glycerol kinase%3B converts glycerol to glycerol-3-phosphate%3B glucose repression of expression is mediated by Adr1p and Ino2p-Ino4p%3B derepression of expression on non-fermentable carbon sources is mediated by Opi1p and Rsf1p [Source:SGD%3BAcc:S000001	VIII	36379	38508	-	856353
4428	YKR076W	7992.51	-1.14006	0.367131	0.00019365	0.0016096	ECM4	S-glutathionyl-(chloro)hydroquinone reductase (GS-HQR)%3B glutathione transferase involved in cell-surface biosynthesis and architecture%3B catalyzes glutathione (GSH)-dependent reduction of GS-trichloro-p-hydroquinone to trichloro-p-hydroquinone%3B expr	XI	582283	583395	+	853951
2954	YGR127W	3171.21	-1.13979	0.198384	1.13217e-09	4.22818e-08	NA	Putative protein of unknown function%3B expression is regulated by Msn2p/Msn4p%2C indicating a possible role in stress response [Source:SGD%3BAcc:S000003359]	VII	746798	747736	+	853028
5569	YNL009W	1893.82	-1.13495	0.223709	4.73693e-08	1.23743e-06	IDP3	Peroxisomal NADP-dependent isocitrate dehydrogenase%3B catalyzes oxidation of isocitrate to alpha-ketoglutarate with the formation of NADP(H+)%2C required for growth on unsaturated fatty acids%3B IDP3 has a paralog%2C IDP2%2C that arose from the whole ge	XIV	614821	616083	+	855723
4140	YKL026C	6989.58	-1.13423	0.342601	9.83408e-05	0.000916586	GPX1	Phospholipid hydroperoxide glutathione peroxidase%3B induced by glucose starvation that protects cells from phospholipid hydroperoxides and nonphospholipid peroxides during oxidative stress%3B GPX1 has a paralog%2C HYR1%2C that arose from the whole genom	XI	389380	389883	-	853842
6835	YPL222W	7413.58	-1.12677	0.193172	6.83666e-10	2.74425e-08	FMP40	Putative protein of unknown function%3B proposed to be involved in responding to environmental stresses%3B the authentic%2C non-tagged protein is detected in highly purified mitochondria in high-throughput studies [Source:SGD%3BAcc:S000006143]	XVI	130162	132228	+	855879
5495	YMR271C	5371.48	-1.11804	0.238014	3.19431e-07	6.73978e-06	URA10	Minor orotate phosphoribosyltransferase (OPRTase) isozyme%3B catalyzes the fifth enzymatic step in the de novo biosynthesis of pyrimidines%2C converting orotate into orotidine-5'-phosphate%3B URA10 has a paralog%2C URA5%2C that arose from the whole genom	XIII	806865	807548	-	855313
6136	YOL126C	34235.5	-1.11432	0.265351	3.18888e-06	4.85934e-05	MDH2	Cytoplasmic malate dehydrogenase%3B one of three isozymes that catalyze interconversion of malate and oxaloacetate%3B involved in the glyoxylate cycle and gluconeogenesis during growth on two-carbon compounds%3B interacts with Pck1p and Fbp1 [Source:SGD%	XV	81787	82920	-	853994
6908	YPR005C	1148.68	-1.10699	0.154828	1.16138e-13	1.15838e-11	HAL1	Cytoplasmic protein involved in halotolerance%3B decreases intracellular Na+ (via Ena1p) and increases intracellular K+ by decreasing efflux%3B expression repressed by Ssn6p-Tup1p and Sko1p and induced by NaCl%2C KCl%2C and sorbitol through Gcn4p [Source	XVI	565787	566671	-	856113
4023	YJR078W	397.002	-1.10633	0.251826	1.37959e-06	2.37171e-05	BNA2	Tryptophan 2%2C3-dioxygenase or indoleamine 2%2C3-dioxygenase%3B required for de novo biosynthesis of NAD from tryptophan via kynurenine%3B interacts genetically with telomere capping gene CDC13%3B regulated by Hst1p and Aftp [Source:SGD%3BAcc:S000003839	X	578860	580221	+	853541
2028	YDR505C	6101.94	-1.09193	0.162808	2.69117e-12	1.88468e-10	PSP1	Asn and gln rich protein of unknown function%3B high-copy suppressor of POL1 (DNA polymerase alpha) and partial suppressor of CDC2 (polymerase delta) and CDC6 (pre-RC loading factor) mutations%3B overexpression results in growth inhibition%3B PSP1 has a	IV	1456695	1459220	-	852116
4365	YKR015C	1288.58	-1.09155	0.28201	1.30349e-05	0.000166619	NA	Putative protein of unknown function [Source:SGD%3BAcc:S000001723]	XI	466961	468667	-	853885
6787	YPL177C	8816.48	-1.08796	0.213948	4.76864e-08	1.24079e-06	CUP9	Homeodomain-containing transcriptional repressor%3B regulates expression of PTR2%2C which encodes a major peptide transporter%3B imported peptides activate ubiquitin-dependent proteolysis%2C resulting in degradation of Cup9p and de-repression of PTR2 tra	XVI	213042	213962	-	855926
3691	YIR028W	544.758	-1.0861	0.260923	3.88789e-06	5.75145e-05	DAL4	Allantoin permease%3B expression sensitive to nitrogen catabolite repression and induced by allophanate%2C an intermediate in allantoin degradation [Source:SGD%3BAcc:S000001467]	IX	408468	410375	+	854846
5409	YMR191W	9373.17	-1.07809	0.332106	0.000133826	0.00118252	SPG5	Protein required for proteasome assembly during quiescence%3B binds to base of the proteasome regulartory particle%3B required for survival at high temperature during stationary phase%3B not required for growth on nonfermentable carbon sources [Source:SG	XIII	645656	646777	+	855229
5260	YMR056C	5095.84	-1.07746	0.224206	1.99874e-07	4.4302e-06	AAC1	Mitochondrial inner membrane ADP/ATP translocator%3B exchanges cytosolic ADP for mitochondrially synthesized ATP%3B phosphorylated%3B Aac1p is a minor isoform while Pet9p is the major ADP/ATP translocator%3B relocalizes from mitochondrion to cytoplasm up	XIII	387315	388244	-	855078
6879	YPL262W	33186.3	-1.06393	0.407437	0.000946964	0.00611163	FUM1	Fumarase%3B converts fumaric acid to L-malic acid in the TCA cycle%3B cytosolic and mitochondrial distribution determined by the N-terminal targeting sequence%2C protein conformation%2C and status of glyoxylate shunt%3B phosphorylated in mitochondria [So	XVI	47336	48802	+	855866
5342	YMR133W	2290.57	-1.0631	0.407626	0.000952095	0.00613873	REC114	Protein involved in early stages of meiotic recombination%3B possibly involved in the coordination of recombination and meiotic division%3B mutations lead to premature initiation of the first meiotic division [Source:SGD%3BAcc:S000004740]	XIII	536207	537609	+	855163
4229	YKL107W	1865.98	-1.06236	0.430068	0.00137261	0.00835882	NA	Putative short-chain dehydrogenase/reductase%3B proposed to be a palmitoylated membrane protein [Source:SGD%3BAcc:S000001590]	XI	236141	237070	+	853753
5812	YNL239W	8299.37	-1.05978	0.173421	1.38201e-10	6.94487e-09	LAP3	Cysteine aminopeptidase with homocysteine-thiolactonase activity%3B protects cells against homocysteine toxicity%3B has bleomycin hydrolase activity in vitro%3B transcription is regulated by galactose via Gal4p%3B orthologous to human BLMH [Source:SGD%3B	XIV	200569	201933	+	855482
1098	YCL064C	64388.9	-1.04832	0.308507	8.3285e-05	0.000801558	CHA1	Catabolic L-serine (L-threonine) deaminase%3B catalyzes the degradation of both L-serine and L-threonine%3B required to use serine or threonine as the sole nitrogen source%2C transcriptionally induced by serine and threonine [Source:SGD%3BAcc:S000000569]	III	15798	16880	-	850295
2144	YEL059C-A	605.228	-1.04448	0.252651	4.67992e-06	6.75612e-05	SOM1	Subunit of the mitochondrial inner membrane peptidase (IMP)%3B IMP is required for maturation of mitochondrial proteins of the intermembrane space%3B Som1p facilitates cleavage of a subset of substrates%3B contains twin cysteine-x9-cysteine motifs [Sourc	V	42400	42624	-	856650
2360	YER158C	2755.54	-1.02957	0.318454	0.000151107	0.00130543	NA	Protein of unknown function%3B potentially phosphorylated by Cdc28p%3B YER158C has a paralog%2C AFR1%2C that arose from the whole genome duplication [Source:SGD%3BAcc:S000000960]	V	488857	490578	-	856903
3364	YHR140W	1818.66	-1.02788	0.407131	0.00125588	0.00775561	NA	Putative integral membrane protein of unknown function [Source:SGD%3BAcc:S000001182]	VIII	380572	381291	+	856543
2265	YER079W	6907.55	-1.02394	0.281087	3.50608e-05	0.000380866	NA	Putative protein of unknown function [Source:SGD%3BAcc:S000000881]	V	318920	319552	+	856812
2867	YGR045C	99.2521	-1.0219	0.472648	0.00307775	0.0160165	NA	Putative protein of unknown function%3B conserved across S. cerevisiae strains [Source:SGD%3BAcc:S000003277]	VII	583934	584296	-	852936
2063	YDR535C	271.003	-1.02121	0.305318	0.000113015	0.00102195	NA	Dubious open reading frame%3B unlikely to encode a functional protein%2C based on available experimental and comparative sequence data%3B YDR535C is not an essential gene [Source:SGD%3BAcc:S000002943]	IV	1506606	1507362	-	NA
3156	YHL015W-A	128.41	-1.02048	0.39942	0.00122593	0.00763508	NA	Putative protein of unknown function [Source:SGD%3BAcc:S000028828]	VIII	74699	74782	+	1466525
6201	YOR019W	4870.22	-1.01945	0.305563	0.000107849	0.000986067	NA	Protein of unknown function%3B may interact with ribosomes%2C based on co-purification experiments%3B YOR019W has a paralog%2C JIP4%2C that arose from the whole genome duplication [Source:SGD%3BAcc:S000005545]	XV	368127	370319	+	854184
2088	YEL012W	9722.07	-1.01601	0.26197	1.41544e-05	0.000178503	UBC8	Ubiquitin-conjugating enzyme that regulates gluconeogenesis%3B negatively regulates gluconeogenesis by mediating the glucose-induced ubiquitination of fructose-1%2C6-bisphosphatase (FBPase)%3B cytoplasmic enzyme that catalyzes the ubiquitination of histo	V	131772	132551	+	856704
6781	YPL171C	1246.47	-1.0036	0.494315	0.0041261	0.0203157	OYE3	Conserved NADPH oxidoreductase containing flavin mononucleotide (FMN)%3B homologous to Oye2p with different ligand binding and catalytic properties%3B has potential roles in oxidative stress response and programmed cell death [Source:SGD%3BAcc:S000006092	XVI	226169	227371	-	855932
521	YAL060W	37618.7	1.03124	0.555593	0.00547861	0.0252792	BDH1	NAD-dependent (R%2CR)-butanediol dehydrogenase%3B catalyzes oxidation of (R%2CR)-2%2C3-butanediol to (3R)-acetoin%2C oxidation of meso-butanediol to (3S)-acetoin%2C and reduction of acetoin%3B enhances use of 2%2C3-butanediol as an aerobic carbon source	I	35155	36303	+	851239
2958	YGR131W	386.926	1.07066	0.3154	8.03936e-05	0.000779383	FHN1	Protein of unknown function%3B induced by ketoconazole%3B promoter region contains sterol regulatory element motif%2C which has been identified as a Upc2p-binding site%3B overexpression complements function of Nce102p in NCE102 deletion strain%3B FHN1 ha	VII	754726	755250	+	853032
3673	YIR016W	4667.12	1.08441	0.332481	0.000124542	0.00111092	NA	Putative protein of unknown function%3B expression directly regulated by the metabolic and meiotic transcriptional regulator Ume6p%3B overexpression causes a cell cycle delay or arrest%3B non-essential gene%3B YIR016W has a paralog%2C YOL036W%2C that aro	IX	382628	383425	+	854833
456	YAL005C	156993	1.08451	0.81099	0.0102206	0.0408513	SSA1	ATPase involved in protein folding and NLS-directed nuclear transport%3B member of HSP70 family%3B required for ubiquitin-dependent degradation of short-lived proteins%3B forms chaperone complex with Ydj1p%3B localized to nucleus%2C cytoplasm%2C cell wal	I	139503	141431	-	851259
5567	YNL007C	39341.9	1.11202	0.319319	5.50176e-05	0.000561521	SIS1	Type II HSP40 co-chaperone that interacts with the HSP70 protein Ssa1p%3B shuttles between cytosol and nucleus%3B mediates delivery of misfolded proteins into the nucleus for degradation%3B involved in proteasomal degradation of misfolded cytosolic prote	XIV	618507	619565	-	855725
5388	YMR173W	2314.52	1.17148	0.433431	0.000619705	0.00430329	DDR48	DNA damage-responsive protein%3B expression is increased in response to heat-shock stress or treatments that produce DNA lesions%3B contains multiple repeats of the amino acid sequence NNNDSYGS%3B protein abundance increases in response to DNA replicatio	XIII	608689	609981	+	855210
6495	YOR298C-A	36217.1	1.20297	0.382218	0.000153937	0.00132121	MBF1	Transcriptional coactivator%3B bridges the DNA-binding region of Gcn4p and TATA-binding protein Spt15p%3B suppressor of frameshift mutations%3B protein abundance increases in response to DNA replication stress [Source:SGD%3BAcc:S000007253]	XV	877230	877685	-	854474
1856	YDR343C	222231	1.2335	0.792978	0.00642936	0.0285205	HXT6	High-affinity glucose transporter%3B member of the major facilitator superfamily%2C nearly identical to Hxt7p%2C expressed at high basal levels relative to other HXTs%2C repression of expression by high glucose requires SNF3%3B HXT6 has a paralog%2C HXT1	IV	1159608	1161320	-	851944
3672	YIR015W	1241.12	1.24289	0.202882	9.73541e-11	5.04631e-09	RPR2	Subunit of nuclear RNase P%3B nuclear RNase P cleaves tRNA precursors to generate mature 5' ends and facilitates turnover of nuclear RNAs%3B not shared between RNase MRP and RNase P%2C in contrast to all other RNase P protein subunits%3B protein abundanc	IX	381948	382382	+	854832
5400	YMR182W-A	329.135	1.25597	0.422799	0.000253499	0.00202768	NA	Putative protein of unknown function [Source:SGD%3BAcc:S000028693]	XIII	625811	625897	+	1466502
5443	YMR222C	1624.49	1.26286	0.144294	2.34226e-19	4.9739e-17	FSH2	Putative serine hydrolase that localizes to the cytoplasm%3B sequence is similar to S. cerevisiae Fsh1p and Fsh3p and the human candidate tumor suppressor OVCA2 [Source:SGD%3BAcc:S000004835]	XIII	715638	716309	-	855262
5732	YNL160W	115503	1.40175	0.484549	0.000277291	0.0021809	YGP1	Cell wall-related secretory glycoprotein%3B induced by nutrient deprivation-associated growth arrest and upon entry into stationary phase%3B may be involved in adaptation prior to stationary phase entry%3B YGP1 has a paralog%2C SPS100%2C that arose from	XIV	336545	337609	+	855562
4150	YKL035W	35008.9	1.40451	0.734735	0.00294743	0.0154605	UGP1	UDP-glucose pyrophosphorylase (UGPase)%3B catalyses the reversible formation of UDP-Glc from glucose 1-phosphate and UTP%2C involved in a wide variety of metabolic pathways%2C expression modulated by Pho85p through Pho4p%3B involved in PKA-mediated oxida	XI	369891	371390	+	853830
6853	YPL240C	154799	1.40624	0.587915	0.00106497	0.00675407	HSP82	Hsp90 chaperone%3B redundant in function with Hsc82p%3B required for pheromone signaling%2C negative regulation of Hsf1p%3B docks with Tom70p for mitochondrial preprotein delivery%3B promotes telomerase DNA binding%2C nucleotide addition%3B protein abund	XVI	96496	98625	-	855836
2911	YGR088W	45632.2	1.52925	0.801563	0.00268426	0.0144014	CTT1	Cytosolic catalase T%3B has a role in protection from oxidative damage by hydrogen peroxide [Source:SGD%3BAcc:S000003320]	VII	654634	656322	+	852979
4060	YJR114W	55.4892	1.55848	0.750346	0.00181962	0.0104525	YJR114W	Dubious open reading frame%3B unlikely to encode a functional protein%2C based on available experimental and comparative sequence data%3B partially overlaps the verified ORF RSM7/YJR113C [Source:SGD%3BAcc:S000003875]	X	638659	639051	+	NA
5399	YMR182C	2391.98	1.56535	0.297486	1.13838e-08	3.37566e-07	RGM1	Putative zinc finger DNA binding transcription factor%3B contains two N-terminal C2H2 zinc fingers and C-terminal proline rich domain%3B overproduction impairs cell growth and induces expression of genes involved in monosaccharide catabolism and aldehyde	XIII	624532	625167	-	855220
1563	YDR074W	45582.9	1.75273	0.682451	0.000524815	0.00373095	TPS2	Phosphatase subunit of the trehalose-6-P synthase/phosphatase complex%3B involved in synthesis of the storage carbohydrate trehalose%3B expression is induced by stress conditions and repressed by the Ras-cAMP pathway%3B protein abundance increases in res	IV	593893	596583	+	851646
6370	YOR178C	12480.1	1.82852	0.492565	1.25946e-05	0.000161619	GAC1	Regulatory subunit for Glc7p type-1 protein phosphatase (PP1)%3B tethers Glc7p to Gsy2p glycogen synthase%2C binds Hsf1p heat shock transcription factor%2C required for induction of some HSF-regulated genes under heat shock%3B GAC1 has a paralog%2C PIG1%	XV	667860	670241	-	854350
4652	YLR118C	3208.85	1.87286	0.303898	4.98673e-11	2.80578e-09	YLR118C	Acyl-protein thioesterase responsible for depalmitoylation of Gpa1p%3B green fluorescent protein (GFP)-fusion protein localizes to both the cytoplasm and nucleus and is induced in response to the DNA-damaging agent MMS [Source:SGD%3BAcc:S000004108]	XII	384725	385408	-	850809
3091	YGR254W	108076	1.91298	0.496373	6.92468e-06	9.57671e-05	ENO1	Enolase I%2C a phosphopyruvate hydratase%3B catalyzes conversion of 2-phosphoglycerate to phosphoenolpyruvate during glycolysis and the reverse reaction during gluconeogenesis%3B expression repressed in response to glucose%3B protein abundance increases	VII	1000927	1002240	+	853169
1855	YDR342C	207081	1.92758	0.760056	0.000528098	0.0037462	HXT7	High-affinity glucose transporter%3B member of the major facilitator superfamily%2C nearly identical to Hxt6p%2C expressed at high basal levels relative to other HXTs%2C expression repressed by high glucose levels%3B HXT7 has a paralog%2C HXT4%2C that ar	IV	1154216	1155928	-	851943
5383	YMR169C	55548.3	1.97919	0.764929	0.000448631	0.00329912	ALD3	Cytoplasmic aldehyde dehydrogenase%3B involved in beta-alanine synthesis%3B uses NAD+ as the preferred coenzyme%3B very similar to Ald2p%3B expression is induced by stress and repressed by glucose [Source:SGD%3BAcc:S000004779]	XIII	599352	600872	-	855205
2539	YFR053C	259719	2.35748	1.49033	0.00290091	0.0152773	HXK1	Hexokinase isoenzyme 1%3B a cytosolic protein that catalyzes phosphorylation of glucose during glucose metabolism%3B expression is highest during growth on non-glucose carbon sources%3B glucose-induced repression involves hexokinase Hxk2p%3B HXK1 has a p	VI	253592	255049	-	850614

## Sheet: cluster 4 (n=95)
	GeneID	baseMean	log2FoldChange	lfcSE	pvalue	padj	GeneName	Description	Chromosome	Start	Stop	Strand	Entrez_ID
3527	YIL057C	10511.2	-5.947	1.14331	NA	NA	RGI2	Protein of unknown function%3B involved in energy metabolism under respiratory conditions%3B expression induced under carbon limitation and repressed under high glucose%3B RGI2 has a paralog%2C RGI1%2C that arose from the whole genome duplication [Source	IX	247902	248396	-	854753
5146	YML089C	94.8181	-4.87245	0.931271	1.02688e-08	3.0912e-07	YML089C	Dubious open reading frame%3B unlikely to encode a functional protein%2C based on available experimental and comparative sequence data%3B expression induced by calcium shortage [Source:SGD%3BAcc:S000004554]	XIII	91041	91409	-	NA
6162	YOL152W	6357.06	-4.79147	0.345784	6.32606e-45	1.04111e-41	FRE7	Putative ferric reductase with similarity to Fre2p%3B expression induced by low copper levels [Source:SGD%3BAcc:S000005512]	XV	40748	42610	+	854013
2064	YDR536W	4737.5	-4.78634	0.422053	4.32612e-31	2.19068e-28	STL1	Glycerol proton symporter of the plasma membrane%3B subject to glucose-induced inactivation%2C strongly but transiently induced when cells are subjected to osmotic shock [Source:SGD%3BAcc:S000002944]	IV	1508005	1509714	+	852149
3316	YHR096C	24484.1	-4.23104	0.631663	1.04828e-12	7.93201e-11	HXT5	Hexose transporter with moderate affinity for glucose%3B induced in the presence of non-fermentable carbon sources%2C induced by a decrease in growth rate%2C contains an extended N-terminal domain relative to other HXTs%3B HXT5 has a paralog%2C HXT3%2C t	VIII	294669	296447	-	856496
442	tX(XXX)L	7.16498	-4.04483	1.34565	0.0001519	0.00130885	tX(XXX)L	NA	NA	NA	NA	NA	851038
352	tQ(UUG)E1	5.9986	-3.97742	1.95835	0.00177742	0.0102549	tQ(UUG)E1	NA	NA	NA	NA	NA	856773
4677	YLR142W	3077.58	-3.89928	0.2344	2.16677e-63	1.42638e-59	PUT1	Proline oxidase%3B nuclear-encoded mitochondrial protein involved in utilization of proline as sole nitrogen source%3B PUT1 transcription is induced by Put3p in the presence of proline and the absence of a preferred nitrogen source [Source:SGD%3BAcc:S000	XII	425186	426616	+	850833
4450	YKR097W	86303	-3.67687	1.21974	NA	NA	PCK1	Phosphoenolpyruvate carboxykinase%3B key enzyme in gluconeogenesis%2C catalyzes early reaction in carbohydrate biosynthesis%2C glucose represses transcription and accelerates mRNA degradation%2C regulated by Mcm1p and Cat8p%2C located in the cytosol [Sou	XI	631152	632801	+	853972
523	YAL062W	5423.54	-3.51023	0.306007	1.0387e-31	6.21617e-29	GDH3	NADP(+)-dependent glutamate dehydrogenase%3B synthesizes glutamate from ammonia and alpha-ketoglutarate%3B rate of alpha-ketoglutarate utilization differs from Gdh1p%3B expression regulated by nitrogen and carbon sources%3B GDH3 has a paralog%2C GDH1%2C	I	31567	32940	+	851237
4314	YKL187C	5827.68	-3.47022	0.248438	1.38899e-45	3.04791e-42	FAT3	Protein required for fatty acid uptake%3B protein abundance increases in cortical patches in response to oleate exposure%3B the authentic%2C non-tagged protein is detected in a phosphorylated state in highly purified mitochondria in high-throughput studi	XI	89284	91536	-	853648
2118	YEL035C	59.3305	-3.45526	0.663051	1.02836e-08	3.0912e-07	UTR5	Protein of unknown function%3B transcription may be regulated by Gcr1p%3B essential for growth under standard (aerobic) conditions but not under anaerobic conditions [Source:SGD%3BAcc:S000000761]	V	85045	85545	-	856676
6813	YPL201C	4594.42	-3.36719	0.54287	2.89877e-11	1.78342e-09	YIG1	Protein that interacts with glycerol 3-phosphatase%3B plays a role in anaerobic glycerol production%3B localizes to the nucleus and cytosol [Source:SGD%3BAcc:S000006122]	XVI	169770	171155	-	855900
5325	YMR118C	2324.58	-3.24694	0.208201	4.90222e-56	1.61356e-52	SHH3	Putative mitochondrial inner membrane protein of unknown function%3B although similar to paralogous Sdh3p%2C Shh3p is not a stoichiometric subunit of either succinate dehydrogenase or of the TIM22 translocase%3B SHH3 has a paralog%2C SDH3%2C that arose f	XIII	502144	502734	-	855145
170	tC(GCA)B	5.41517	-3.20195	1.96606	0.00334974	0.0171472	tC(GCA)B	NA	NA	NA	NA	NA	852509
514	YAL054C	14951	-3.1729	0.635217	2.9366e-08	7.98829e-07	ACS1	Acetyl-coA synthetase isoform%3B along with Acs2p%2C acetyl-coA synthetase isoform is the nuclear source of acetyl-coA for histone acetylation%3B expressed during growth on nonfermentable carbon sources and under aerobic conditions [Source:SGD%3BAcc:S000	I	42881	45022	-	851245
5574	YNL014W	3917.32	-2.97505	0.306452	1.61977e-23	5.07761e-21	HEF3	Translational elongation factor EF-3%3B member of the ABC superfamily%3B stimulates EF-1 alpha-dependent binding of aminoacyl-tRNA by the ribosome%3B normally expressed in zinc deficient cells%3B HEF3 has a paralog%2C YEF3%2C that arose from the whole ge	XIV	606319	609453	+	855718
4947	YLR377C	36368	-2.88717	1.71408	NA	NA	FBP1	Fructose-1%2C6-bisphosphatase%3B key regulatory enzyme in the gluconeogenesis pathway%2C required for glucose metabolism%3B undergoes either proteasome-mediated or autophagy-mediated degradation depending on growth conditions%3B glucose starvation result	XII	873746	874792	-	851092
4858	YLR296W	73.8195	-2.8826	0.508033	8.1369e-10	3.2075e-08	YLR296W	Putative protein of unknown function%3B conserved across S. cerevisiae strains [Source:SGD%3BAcc:S000004287]	XII	722978	723304	+	851003
2551	YGL007C-A	55.3083	-2.8522	0.37919	3.77858e-15	4.60637e-13	YGL007C-A	Putative protein of unknown function%3B identified by gene-trapping%2C microarray-based expression analysis%2C and genome-wide homology searching%3B deletion exhibits slow-growth phenotype%3B computationally predicted to have a role in cell budding [Sour	VII	482941	483027	-	1466455
2851	YGR032W	13502	-2.74443	0.238549	7.63858e-32	5.02848e-29	GSC2	Catalytic subunit of 1%2C3-beta-glucan synthase%3B involved in formation of the inner layer of the spore wall%3B activity positively regulated by Rho1p and negatively by Smk1p%3B GSC2 has a paralog%2C FKS1%2C that arose from the whole genome duplication	VII	548264	553951	+	852920
1117	YCR010C	11015.9	-2.72466	1.45939	0.00167871	0.00979693	ADY2	Acetate transporter required for normal sporulation%3B phosphorylated in mitochondria%3B ADY2 has a paralog%2C ATO2%2C that arose from the whole genome duplication [Source:SGD%3BAcc:S000000603]	III	132273	133124	-	850368
3750	YJL045W	3173.77	-2.72067	0.319815	1.05838e-18	2.04921e-16	YJL045W	Minor succinate dehydrogenase isozyme%3B participates in oxidation of succinate and transfer of electrons to ubiquinone%3B induced during the diauxic shift in a Cat8p-dependent manner%3B YJL045W has a paralog%2C SDH1%2C that arose from the whole genome d	X	356024	357928	+	853405
4544	YLR012C	43.5652	-2.71715	0.785034	2.58306e-05	0.000293177	YLR012C	Putative protein of unknown function%3B YLR012C is not an essential gene [Source:SGD%3BAcc:S000004002]	XII	169982	170281	-	850699
6766	YPL156C	5788.16	-2.70615	0.440819	4.74721e-11	2.69404e-09	PRM4	Pheromone-regulated protein proposed to be involved in mating%3B predicted to have 1 transmembrane segment%3B transcriptionally regulated by Ste12p during mating and by Cat8p during the diauxic shift [Source:SGD%3BAcc:S000006077]	XVI	255913	256767	-	855947
2910	YGR087C	559.532	-2.61265	0.267084	7.09189e-24	2.33429e-21	PDC6	Minor isoform of pyruvate decarboxylase%3B decarboxylates pyruvate to acetaldehyde%2C involved in amino acid catabolism%3B transcription is glucose- and ethanol-dependent%2C and is strongly induced during sulfur limitation [Source:SGD%3BAcc:S000003319]	VII	651290	652981	-	852978
3036	YGR201C	8322.68	-2.54	0.212018	2.8775e-34	2.36782e-31	YGR201C	Putative protein of unknown function [Source:SGD%3BAcc:S000003433]	VII	902520	903197	-	853115
5144	YML087C	4901.6	-2.48596	0.315752	2.11463e-16	2.96183e-14	AIM33	Protein of unknown function%2C highly conserved across species%3B homolog of human CYB5R4%3B null mutant displays reduced frequency of mitochondrial genome loss%3B AIM33 has a paralog%2C PGA3%2C that arose from the whole genome duplication [Source:SGD%3B	XIII	94431	95369	-	854887
1760	YDR256C	5578.81	-2.45775	0.586893	1.49308e-06	2.52672e-05	CTA1	Catalase A%3B breaks down hydrogen peroxide in the peroxisomal matrix formed by acyl-CoA oxidase (Pox1p) during fatty acid beta-oxidation [Source:SGD%3BAcc:S000002664]	IV	968133	969680	-	851843
7114	YPR193C	369.084	-2.45761	0.336804	1.86726e-14	2.0487e-12	HPA2	Tetrameric histone acetyltransferase%3B has similarity to Gcn5p%2C Hat1p%2C Elp3p%2C and Hpa3p%3B acetylates histones H3 and H4 in vitro and exhibits autoacetylation activity%3B also acetylates polyamines [Source:SGD%3BAcc:S000006397]	XVI	922909	923379	-	856323
5851	YNL277W-A	70.4192	-2.38448	0.547241	7.68444e-07	1.43712e-05	YNL277W-A	Putative protein of unknown function [Source:SGD%3BAcc:S000028852]	XIV	116679	116867	+	1466509
6909	YPR006C	3622.29	-2.35128	0.304699	7.51596e-16	9.70149e-14	ICL2	2-methylisocitrate lyase of the mitochondrial matrix%3B functions in the methylcitrate cycle to catalyze the conversion of 2-methylisocitrate to succinate and pyruvate%3B ICL2 transcription is repressed by glucose and induced by ethanol [Source:SGD%3BAcc	XVI	567269	568996	-	856114
416	tV(AAC)E2	23.4496	-2.33747	0.94094	0.000619034	0.00430317	tV(AAC)E2	NA	NA	NA	NA	NA	856894
6546	YOR343C	270.761	-2.20891	0.451881	6.15129e-08	1.55746e-06	YOR343C	Putative protein of unknown function%3B conserved across S. cerevisiae strains [Source:SGD%3BAcc:S000005870]	XV	968148	968474	-	854521
5775	YNL202W	586.197	-2.13779	0.400429	5.79883e-09	1.80918e-07	SPS19	Peroxisomal 2%2C4-dienoyl-CoA reductase%3B auxiliary enzyme of fatty acid beta-oxidation%3B homodimeric enzyme required for growth and sporulation on petroselineate medium%3B expression induced during late sporulation and in the presence of oleate [Sourc	XIV	259578	260456	+	855518
7113	YPR192W	1798.15	-2.04601	0.36392	1.22451e-09	4.52863e-08	AQY1	Spore-specific water channel%3B mediates the transport of water across cell membranes%2C developmentally controlled%3B may play a role in spore maturation%2C probably by allowing water outflow%2C may be involved in freeze tolerance [Source:SGD%3BAcc:S000	XVI	921860	922777	+	856322
4390	YKR039W	2396.24	-2.01203	0.270885	7.69581e-15	9.0467e-13	GAP1	General amino acid permease%3B Gap1p senses the presence of amino acid substrates to regulate localization to the plasma membrane when needed%3B essential for invasive growth [Source:SGD%3BAcc:S000001747]	XI	515063	516871	+	853912
1900	YDR380W	4249.28	-1.97466	0.551949	1.98746e-05	0.000233217	ARO10	Phenylpyruvate decarboxylase%3B catalyzes decarboxylation of phenylpyruvate to phenylacetaldehyde%2C which is the first specific step in the Ehrlich pathway%3B involved in protein N-terminal Met and Ala catabolism [Source:SGD%3BAcc:S000002788]	IV	1234218	1236125	+	851987
2468	YFL059W	1244.31	-1.96595	0.286908	5.08859e-13	4.03592e-11	SNZ3	Member of a stationary phase-induced gene family%3B expressed in the presence of galactose%3B transcription of SNZ3 is induced prior to diauxic shift%2C and also in the absence of thiamin in a Thi2p-dependent manner%3B forms a coregulated gene pair with	VI	11363	12259	+	850485
2552	YGL007W	159.987	-1.91815	0.466181	2.43784e-06	3.87639e-05	BRP1	Putative protein of unknown function%3B conserved among S. cerevisiae strains%3B located in the upstream region of PMA1%3B deletion leads to polyamine resistance due to downregulation of PMA1 [Source:SGD%3BAcc:S000002975]	VII	483260	483637	+	852877
6369	YOR177C	451.187	-1.89564	0.200375	2.28301e-22	5.56631e-20	MPC54	Component of the meiotic outer plaque%3B a membrane-organizing center which is assembled on the cytoplasmic face of the spindle pole body during meiosis II and triggers the formation of the prospore membrane%3B potential Cdc28p substrate [Source:SGD%3BAc	XV	665785	667179	-	854349
6553	YOR348C	8733.36	-1.86485	2.10605	0.00622008	0.0278199	PUT4	Proline permease%3B required for high-affinity transport of proline%3B also transports the toxic proline analog azetidine-2-carboxylate (AzC)%3B PUT4 transcription is repressed in ammonia-grown cells [Source:SGD%3BAcc:S000005875]	XV	986899	988782	-	854530
559	YAR047C	132.14	-1.85991	0.561619	5.37179e-05	0.000550818	YAR047C	Dubious open reading frame%3B unlikely to encode a functional protein%2C based on available experimental and comparative sequence data [Source:SGD%3BAcc:S000000083]	I	201467	201787	-	NA
4104	YJR155W	4733.47	-1.85394	0.226636	2.12053e-17	3.57934e-15	AAD10	Putative aryl-alcohol dehydrogenase%3B similar to P. chrysosporium aryl-alcohol dehydrogenase%3B mutational analysis has not yet revealed a physiological role%3B members of the AAD gene family comprise three pairs (AAD3 + AAD15%2C AAD6/AAD16 + AAD4%2C AA	X	727405	728271	+	853620
5909	YNL333W	1210.9	-1.79657	0.258086	2.5562e-13	2.24366e-11	SNZ2	Member of a stationary phase-induced gene family%3B transcription of SNZ2 is induced prior to diauxic shift%2C and also in the absence of thiamin in a Thi2p-dependent manner%3B forms a coregulated gene pair with SNO2%3B interacts with Thi11p [Source:SGD%	XIV	13267	14163	+	855383
2065	YDR537C	33.3574	-1.76621	0.619208	0.000236977	0.0019128	YDR537C	Dubious open reading frame%3B unlikely to encode a functional protein%2C based on available experimental and comparative sequence data%3B almost completely overlaps verified ORF PAD1/YDR538W [Source:SGD%3BAcc:S000002945]	IV	1510856	1511461	-	NA
753	YBR050C	6279.78	-1.76026	1.04626	0.00326076	0.0167831	REG2	Regulatory subunit of the Glc7p type-1 protein phosphatase%3B involved with Reg1p%2C Glc7p%2C and Snf1p in regulation of glucose-repressible genes%2C also involved in glucose-induced proteolysis of maltose permease%3B REG2 has a paralog%2C REG1%2C that a	II	337183	338199	-	852340
1448	YDL215C	26426	-1.73552	0.31809	3.6046e-09	1.20452e-07	GDH2	NAD(+)-dependent glutamate dehydrogenase%3B degrades glutamate to ammonia and alpha-ketoglutarate%3B expression sensitive to nitrogen catabolite repression and intracellular ammonia levels%3B genetically interacts with GDH3 by suppressing stress-induced	IV	70640	73918	-	851311
6128	YOL118C	423.241	-1.71342	0.310651	2.58136e-09	9.03889e-08	YOL118C	Putative protein of unknown function%3B conserved across S. cerevisiae strains [Source:SGD%3BAcc:S000005478]	XV	96608	96916	-	854031
327	tN(GUU)N1	37.2977	-1.70668	0.904427	0.00254082	0.0137551	tN(GUU)N1	NA	NA	NA	NA	NA	855435
790	YBR083W	5184.34	-1.65011	0.234128	1.48709e-13	1.37712e-11	TEC1	Transcription factor targeting filamentation genes and Ty1 expression%3B Ste12p activation of most filamentation gene promoters depends on Tec1p and Tec1p transcriptional activity is dependent on its association with Ste12p%3B binds to TCS elements upstr	II	409169	410629	+	852377
7030	YPR123C	748.074	-1.62867	0.464519	3.05076e-05	0.00034155	YPR123C	Dubious open reading frame%3B unlikely to encode a functional protein%2C based on available experimental and comparative sequence data%3B partially/completely overlaps the verified ORF CTR [Source:SGD%3BAcc:S000006327]	XVI	786141	786575	-	NA
560	YAR050W	1706.66	-1.62612	0.326568	4.89863e-08	1.26959e-06	FLO1	Lectin-like protein involved in flocculation%3B cell wall protein that binds mannose chains on the surface of other cells%2C confers floc-forming ability that is chymotrypsin sensitive and heat resistant%3B important for co-flocculation with other yeasts	I	203403	208016	+	851289
4727	YLR174W	31347.4	-1.60411	1.45873	NA	NA	IDP2	Cytosolic NADP-specific isocitrate dehydrogenase%3B catalyzes oxidation of isocitrate to alpha-ketoglutarate%3B levels are elevated during growth on non-fermentable carbon sources and reduced during growth on glucose%3B IDP2 has a paralog%2C IDP3%2C that	XII	504591	505829	+	850871
3191	YHL046W-A	151.689	-1.59065	0.421616	1.15205e-05	0.000150177	YHL046W-A	Dubious open reading frame%3B unlikely to encode a functional protein%2C based on available experimental and comparative sequence data%3B overlaps ORF ARN2/YHL047C [Source:SGD%3BAcc:S000028775]	VIII	9981	10307	+	NA
6166	YOL156W	776.207	-1.57101	0.226875	3.75479e-13	3.16894e-11	HXT11	Hexose transporter%3B capable of transporting a broad range of substrates including: glucose%2C fructose%2C mannose and galactose%3B polyol transporter that supports the growth on and uptake of xylitol with low affinity when overexpressed in a strain del	XV	25273	26976	+	854009
1406	YDL174C	34738.7	-1.5228	0.57349	0.000492473	0.00355088	DLD1	Major mitochondrial D-lactate dehydrogenase%3B oxidizes D-lactate to pyruvate%2C transcription is heme-dependent%2C repressed by glucose%2C and derepressed in ethanol or lactate%3B located in the mitochondrial inner membrane [Source:SGD%3BAcc:S000002333]	IV	145826	147589	-	851380
3648	YIL170W	327.485	-1.51762	0.387055	6.79455e-06	9.41653e-05	YIL170W	NA	NA	NA	NA	NA	854636
2152	YEL066W	1370.01	-1.50643	0.326639	3.26842e-07	6.84641e-06	HPA3	D-Amino acid N-acetyltransferase that detoxifies D-amino acids%3B catalyzes N-acetylation of D-amino acids through ordered bi-bi mechanism in which acetyl-CoA is first substrate bound and CoA is last product liberated%3B acetylates histones and polyamine	V	26667	27206	+	856642
924	YBR201C-A	1152.04	-1.49016	0.331911	5.84398e-07	1.13484e-05	YBR201C-A	Putative protein of unknown function [Source:SGD%3BAcc:S000087085]	II	624493	624696	-	3799967
783	YBR076W	414.301	-1.46504	0.334058	9.56845e-07	1.73524e-05	ECM8	Non-essential protein of unknown function [Source:SGD%3BAcc:S000000280]	II	390227	391291	+	852368
1726	YDR223W	1523.68	-1.45605	0.265143	3.57082e-09	1.19932e-07	CRF1	Transcriptional corepressor%3B involved in repression of ribosomal protein (RP) gene transcription via the TOR signaling pathway which promotes accumulation of Crf1p in the nucleus%3B role in repression of RP genes varies by strain%3B CRF1 has a paralog%	IV	912099	913502	+	851809
2733	YGL184C	669.376	-1.41993	0.490118	0.000270268	0.00213075	STR3	Peroxisomal cystathionine beta-lyase%3B converts cystathionine into homocysteine%3B may be redox regulated by Gto1p%3B involved in the release of the aromatic thiol 3-mercaptohexanol during wine fermentation [Source:SGD%3BAcc:S000003152]	VII	154615	156012	-	852691
605	YBL029W	2322.45	-1.38237	0.195452	1.5062e-13	1.37712e-11	YBL029W	Non-essential protein of unknown function [Source:SGD%3BAcc:S000000125]	II	166134	167264	+	852252
3748	YJL043W	164.823	-1.36477	0.33684	4.59564e-06	6.66368e-05	YJL043W	Putative protein of unknown function%3B YJL043W is a non-essential gene [Source:SGD%3BAcc:S000003579]	X	360130	360903	+	853407
3075	YGR239C	1973.67	-1.34754	0.34732	9.24696e-06	0.000123474	PEX21	Peroxin required for peroxisomal matrix protein targeting%3B acts on proteins containing the PTS2 targeting sequence%3B interacts with Pex7p%3B constitutively expressed%3B partially redundant with Pex18p%3B required for import of the Gpd1p-Pnc1p heterodi	VII	969187	970053	-	853154
6812	YPL200W	583.305	-1.34684	0.36814	2.18491e-05	0.000252849	CSM4	Protein required for accurate chromosome segregation during meiosis%3B involved in meiotic telomere clustering (bouquet formation) and telomere-led rapid prophase movements%3B functions with meiosis-specific telomere-binding protein Ndj1p%3B CSM4 has a p	XVI	171484	171954	+	855901
6271	YOR084W	2328.38	-1.2991	0.325838	6.27981e-06	8.73995e-05	LPX1	Peroxisomal matrix-localized lipase%3B required for normal peroxisome morphology%3B contains a peroxisomal targeting signal type 1 (PTS1) and a lipase motif%3B peroxisomal import requires the PTS1 receptor%2C Pex5p and self-interaction%3B transcriptional	XV	480587	481750	+	854251
1744	YDR241W	440.293	-1.29263	0.337501	1.19181e-05	0.000154442	BUD26	Dubious open reading frame%3B unlikely to encode a functional protein%2C based on available experimental and comparative sequence data%3B not conserved in closely related Saccharomyces species%3B 1%25 of ORF overlaps the verified gene SNU56%3B diploid mu	IV	945151	945438	+	NA
4843	YLR284C	2433.04	-1.27093	0.379637	7.33126e-05	0.000716048	ECI1	Peroxisomal delta3%2Cdelta2-enoyl-CoA isomerase%3B hexameric protein that converts 3-hexenoyl-CoA to trans-2-hexenoyl-CoA%2C essential for the beta-oxidation of unsaturated fatty acids%2C oleate-induced%3B ECI1 has a paralog%2C DCI1%2C that arose from th	XII	706198	707040	-	850990
6529	YOR328W	4349.43	-1.26035	0.224373	2.0762e-09	7.3879e-08	PDR10	ATP-binding cassette (ABC) transporter%3B multidrug transporter involved in the pleiotropic drug resistance network%3B regulated by Pdr1p and Pdr3p [Source:SGD%3BAcc:S000005855]	XV	931803	936497	+	854506
524	YAL063C	1808.17	-1.25258	0.261345	1.71605e-07	3.86875e-06	FLO9	Lectin-like protein with similarity to Flo1p%3B thought to be expressed and involved in flocculation [Source:SGD%3BAcc:S000000059]	I	24000	27968	-	851236
60	RME2	13.7584	-1.2488	1.47616	0.0111261	0.0438057	RME2	NA	NA	NA	NA	NA	23547380
2270	YER084W	185.806	-1.2146	0.618165	0.00338649	0.017295	YER084W	Protein of unknown function%3B expressed at both mRNA and protein levels [Source:SGD%3BAcc:S000000886]	V	327065	327451	+	856816
4826	YLR267W	3753.56	-1.18807	0.684653	0.00524828	0.0243993	BOP2	Protein of unknown function [Source:SGD%3BAcc:S000004257]	XII	678212	679924	+	850972
6720	YPL113C	1009	-1.18649	0.251901	2.77064e-07	5.94107e-06	YPL113C	Glyoxylate reductase%3B acts on glyoxylate and hydroxypyruvate substrates%3B YPL113C is not an essential gene [Source:SGD%3BAcc:S000006034]	XVI	335953	337143	-	855990
3238	YHR033W	4366.47	-1.17053	0.675241	0.00538929	0.0249667	YHR033W	Putative protein of unknown function%3B epitope-tagged protein localizes to the cytoplasm%3B YHR033W has a paralog%2C PRO1%2C that arose from the whole genome duplication [Source:SGD%3BAcc:S000001075]	VIII	175548	176819	+	856428
1596	YDR104C	2328.75	-1.16243	0.212933	5.71194e-09	1.79288e-07	SPO71	Meiosis-specific protein required for prospore membrane morphogenesis%3B localizes to the prospore membrane (PSM) during sporulation%3B required for PSM elongation and closure%3B genetically antagonistic to SPO1%3B recruits Vps13p to the PSM during sporu	IV	661173	664910	-	851681
120	snR60	15.6239	-1.14878	1.10303	0.0118402	0.0459576	snR60	NA	NA	NA	NA	NA	9164911
6214	YOR032C	981.111	-1.14079	0.190538	2.65716e-10	1.22322e-08	HMS1	bHLH protein with similarity to myc-family transcription factors%3B overexpression confers hyperfilamentous growth and suppresses the pseudohyphal filamentation defect of a diploid mep1 mep2 homozygous null mutant [Source:SGD%3BAcc:S000005558]	XV	389771	391075	-	854197
528	YAL064W-B	127.924	-1.13158	0.395332	0.000429341	0.00317568	YAL064W-B	Fungal-specific protein of unknown function [Source:SGD%3BAcc:S000002141]	I	12046	12426	+	851233
4102	YJR153W	844.457	-1.11609	0.293474	1.65458e-05	0.000200962	PGU1	Endo-polygalacturonase%3B pectolytic enzyme that hydrolyzes the alpha-1%2C4-glycosidic bonds in the rhamnogalacturonan chains in pectins [Source:SGD%3BAcc:S000003914]	X	722815	723900	+	853618
5769	YNL196C	539.392	-1.08458	0.237293	6.17994e-07	1.19304e-05	SLZ1	Sporulation-specific protein with a leucine zipper motif%3B subunit of the MIS complex which controls mRNA methylation during during the induction of sporulation [Source:SGD%3BAcc:S000005140]	XIV	270275	271171	-	855525
1192	YCR082W	5846.59	-1.06684	0.136318	7.16954e-16	9.43942e-14	AHC2	Component of the ADA histone acetyltransferase complex%3B Ahc2p and Ahc1p are unique to the ADA complex and not shared with the related SAGA and SLIK complexes%3B may tether Ahc1p to the complex [Source:SGD%3BAcc:S000000678]	III	258883	259269	+	850443
4645	YLR111W	92.8659	-1.06301	0.43081	0.00139813	0.00848285	YLR111W	Putative protein of unknown function%3B conserved across S. cerevisiae strains [Source:SGD%3BAcc:S000004101]	XII	370391	370723	+	850801
5379	YMR165C	5458.26	-1.0628	0.219408	1.69264e-07	3.82909e-06	PAH1	Mg2+-dependent phosphatidate (PA) phosphatase%3B dephosphorylates PA to yield diacylglycerol%3B regulates phospholipid synthesis%2C nuclear/ER membrane growth%2C lipid droplet formation%2C triacylglycerol synthesis%2C vacuolar homeostasis and cell wall i	XIII	590040	592628	-	855201
7031	YPR124W	17599.1	-1.06086	0.442601	0.00165798	0.00971038	CTR1	High-affinity copper transporter of plasma membrane%3B mediates nearly all copper uptake under low copper conditions%3B transcriptionally induced at low copper levels and degraded at high copper levels%3B protein increases in abundance and relocalizes fr	XVI	786208	787428	+	856241
4702	YLR157C	767.645	-1.05304	0.188717	3.34619e-09	1.13546e-07	ASP3-2	Cell-wall L-asparaginase II involved in asparagine catabolism%3B expression induced during nitrogen starvation%3B ORF contains a short non-coding RNA that enhances expression of full-length gene%3B likely arose in via horizontal gene transfer from the wi	XII	472969	474057	-	850852
967	YBR239C	1719.52	-1.05301	0.249419	3.1759e-06	4.85081e-05	ERT1	Transcriptional regulator%3B involved in regulation of gluconeogenesis and fermentable carbon utilization%3B GFP-fusion protein localizes to cytoplasm%2C nucleus%3B null mutation affects periodicity of transcriptional and metabolic oscillation%3B plays r	II	698354	699943	-	852541
6372	YOR180C	1798.92	-1.03563	0.237751	1.79437e-06	2.9754e-05	DCI1	Peroxisomal protein%3B identification as a delta(3%2C5)-delta(2%2C4)-dienoyl-CoA isomerase involved in fatty acid metabolism is disputed%3B DCI1 has a paralog%2C ECI1%2C that arose from the whole genome duplication [Source:SGD%3BAcc:S000005706]	XV	674352	675167	-	854352
5910	YNL334C	415.48	-1.0238	0.22984	1.17386e-06	2.08289e-05	SNO2	Protein of unknown function%3B nearly identical to Sno3p%3B expression is induced before the diauxic shift and also in the absence of thiamin [Source:SGD%3BAcc:S000005278]	XIV	12208	12876	-	855382
4699	YLR155C	2061.25	-1.01306	0.207304	1.47751e-07	3.40086e-06	ASP3-1	Cell-wall L-asparaginase II involved in asparagine catabolism%3B expression induced during nitrogen starvation%3B ORF contains a short non-coding RNA that enhances expression of full-length gene%3B likely arose in via horizontal gene transfer from the wi	XII	469317	470405	-	850850
3692	YIR029W	1145.15	-1.00327	0.299069	0.000104154	0.000957604	DAL2	Allantoicase%3B converts allantoate to urea and ureidoglycolate in the second step of allantoin degradation%3B expression sensitive to nitrogen catabolite repression and induced by allophanate%2C an intermediate in allantoin degradation [Source:SGD%3BAcc	IX	410807	411838	+	854847
4522	YLL060C	1427.98	-1.00142	0.172565	9.83013e-10	3.74056e-08	GTT2	Glutathione S-transferase capable of homodimerization%3B functional overlap with Gtt2p%2C Grx1p%2C and Grx2p%3B protein abundance increases in response to DNA replication stress [Source:SGD%3BAcc:S000003983]	XII	21138	21839	-	850666
2429	YFL021W	1236.27	-1.00119	0.374269	0.000885919	0.00579722	GAT1	Transcriptional activator of nitrogen catabolite repression genes%3B contains a GATA-1-type zinc finger DNA-binding motif%3B activity and localization regulated by nitrogen limitation and Ure2p%3B different translational starts produce two major and two	VI	95966	97498	+	850523

## Sheet: cluster 5 (n=59)
	GeneID	baseMean	log2FoldChange	lfcSE	pvalue	padj	GeneName	Description	Chromosome	Start	Stop	Strand	Entrez_ID
569	YAR071W	5179.64	2.87467	0.348541	9.03961e-18	1.65299e-15	PHO11	One of three repressible acid phosphatases%3B glycoprotein that is transported to the cell surface by the secretory pathway%3B induced by phosphate starvation and coordinately regulated by PHO4 and PHO2%3B PHO11 has a paralog%2C PHO12%2C that arose from	I	225460	226863	+	851299
6062	YOL058W	5429.96	-3.40668	0.571494	1.30098e-10	6.58794e-09	ARG1	Arginosuccinate synthetase%3B catalyzes the formation of L-argininosuccinate from citrulline and L-aspartate in the arginine biosynthesis pathway%3B potential Cdc28p substrate [Source:SGD%3BAcc:S000005419]	XV	219211	220473	+	854096
213	tF(GAA)H1	64.6317	-7.4418	2.85866	3.80906e-06	5.66027e-05	NA	NA	NA	NA	NA	NA	856469
3315	YHR095W	35.0567	-1.27243	0.987422	0.008478	0.0353734	NA	Dubious open reading frame%3B unlikely to encode a functional protein%2C based on available experimental and comparative sequence data [Source:SGD%3BAcc:S000001137]	VIII	292943	293437	+	NA
331	tN(GUU)P	44.0031	-2.74623	0.893424	9.61757e-05	0.000900604	NA	NA	NA	NA	NA	NA	856259
67	RUF23	43.9865	-1.89627	0.62556	0.00014704	0.00128719	NA	NA	NA	NA	NA	NA	9164890
6434	YOR237W	464.315	-1.44446	0.445844	9.60249e-05	0.000900472	HES1	Protein implicated in the regulation of ergosterol biosynthesis%3B one of a seven member gene family with a common essential function and non-essential unique functions%3B similar to human oxysterol binding protein (OSBP)%3B SWAT-GFP and mCherry fusion p	XV	781994	783298	+	854412
570	YAR073W	120.535	-1.57711	1.3877	0.00748471	0.0319532	IMD1	Nonfunctional protein with homology to IMP dehydrogenase%3B blocked reading frame%2C located close to the telomere%3B not expressed at detectable levels%3B YAR073W and YAR075W comprise a continuous reading frame in most strains of S. cerevisiae%3B YAR073	I	227742	228953	+	NA
3152	YHL012W	1670.92	-1.03186	0.512754	0.00413488	0.0203437	NA	Putative UTP glucose-1-phosphate uridylyltransferase%3B YHL012W has a paralog%2C UGP1%2C that arose from the whole genome duplication [Source:SGD%3BAcc:S000001004]	VIII	78936	80417	+	856374
6545	YOR342C	5142.25	-1.0671	0.331591	0.00015097	0.00130543	NA	Protein of unknown function%3B green fluorescent protein (GFP)-fusion protein localizes to the cytoplasm and the nucleus%3B relocalizes from nucleus to cytoplasm upon DNA replication stress%3B YOR342C has a paralog%2C YAL037W%2C that arose from the whole	XV	966666	967625	-	854520
2602	YGL055W	44182	-1.03706	1.2423	0.0143619	0.0535664	OLE1	Delta(9) fatty acid desaturase%3B required for monounsaturated fatty acid synthesis and for normal distribution of mitochondria [Source:SGD%3BAcc:S000003023]	VII	398628	400160	+	852825
3500	YIL032C	34.4775	-1.15858	0.597995	0.00393948	0.0195725	NA	Dubious open reading frame%3B unlikely to encode a functional protein%2C based on available experimental and comparative sequence data [Source:SGD%3BAcc:S000001294]	IX	291961	292317	-	NA
3474	YIL011W	2344.41	-1.45967	0.248376	3.75668e-10	1.63776e-08	TIR3	Cell wall mannoprotein%3B member of Srp1p/Tip1p family of serine-alanine-rich proteins%3B expressed under anaerobic conditions and required for anaerobic growth%3B TIR3 has a paralog%2C TIR2%2C that arose from the whole genome duplication [Source:SGD%3BA	IX	333727	334536	+	854804
6940	YPR035W	33763.8	-1.80897	0.634019	0.000237103	0.0019128	GLN1	Glutamine synthetase (GS)%3B synthesizes glutamine from glutamate and ammonia%3B with Glt1p%2C forms the secondary pathway for glutamate biosynthesis from ammonia%3B expression regulated by nitrogen source and by amino acid limitation%3B forms filaments	XVI	642208	643320	+	856147
2931	YGR108W	6581.83	-1.1562	0.259997	1.00195e-06	1.80214e-05	CLB1	B-type cyclin involved in cell cycle progression%3B activates Cdc28p to promote the transition from G2 to M phase%3B accumulates during G2 and M%2C then targeted via a destruction box motif for ubiquitin-mediated degradation by the proteasome%3B CLB1 has	VII	703636	705051	+	853002
6443	YOR247W	5184.75	-1.39254	0.478354	0.00026961	0.00212811	SRL1	Mannoprotein that exhibits a tight association with the cell wall%3B required for cell wall stability in the absence of GPI-anchored mannoproteins%3B has a high serine-threonine content%3B expression is induced in cell wall mutants%3B SRL1 has a paralog%	XV	797676	798308	+	854421
2491	YFR012W	76.197	-1.98892	0.568101	2.68342e-05	0.000303001	DCV1	Protein of unknown function%3B deletion mutant shows strong genetic interaction with cdc28-as1 mutant in the presence of 1-NM-PP1%3B DCV1 has a paralog%2C YOL019W%2C that arose from the whole genome duplication [Source:SGD%3BAcc:S000001908]	VI	167888	168496	+	850565
5078	YML027W	1914.93	-1.2852	0.362609	3.59949e-05	0.000389728	YOX1	Homeobox transcriptional repressor%3B binds to Mcm1p and to early cell cycle boxes (ECBs) in the promoters of cell cycle-regulated genes expressed in M/G1 phase%3B expression is cell cycle-regulated%3B phosphorylated by Cdc28p%3B relocalizes from nucleus	XIII	221406	222563	+	854981
5865	YNL289W	2334.54	-3.93322	1.07321	1.03777e-05	0.00013636	PCL1	Cyclin%2C interacts with cyclin-dependent kinase Pho85p%3B member of the Pcl1%2C2-like subfamily%2C involved in the regulation of polarized growth and morphogenesis and progression through the cell cycle%3B is ubiquitinated by Dma1p%3B phosphorylation by	XIV	87897	88736	+	855427
4363	YKR013W	4992.52	-2.01395	0.400578	3.21562e-08	8.60506e-07	PRY2	Sterol binding protein involved in the export of acetylated sterols%3B secreted glycoprotein and member of the CAP protein superfamily (cysteine-rich secretory proteins (CRISP)%2C antigen 5%2C and pathogenesis related 1 proteins)%3B sterol export functio	XI	463959	464948	+	853882
5262	YMR058W	23292.9	-2.70228	0.236582	2.02531e-31	1.11105e-28	FET3	Ferro-O2-oxidoreductase%3B multicopper oxidase that oxidizes ferrous (Fe2+) to ferric iron (Fe3+) for subsequent cellular uptake by transmembrane permease Ftr1p%3B required for high-affinity iron uptake and involved in mediating resistance to copper ion	XIII	388822	390732	+	855080
4671	YLR136C	1082.77	-2.13439	0.320715	1.83467e-12	1.35704e-10	TIS11	mRNA-binding protein expressed during iron starvation%3B binds to a sequence element in the 3'-untranslated regions of specific mRNAs to mediate their degradation%3B involved in iron homeostasis%3B protein increases in abundance and relative distribution	XII	415801	416658	-	850827
6871	YPL256C	2658.37	-1.15498	0.349649	9.96646e-05	0.000921724	CLN2	G1 cyclin involved in regulation of the cell cycle%3B activates Cdc28p kinase to promote the G1 to S phase transition%3B late G1 specific expression depends on transcription factor complexes%2C MBF (Swi6p-Mbp1p) and SBF (Swi6p-Swi4p)%3B CLN2 has a paralo	XVI	64977	66614	-	855819
6006	YOL007C	2417.88	-1.37692	0.416711	7.72521e-05	0.000752293	CSI2	Protein of unknown function%3B green fluorescent protein (GFP)- fusion protein localizes to the mother side of the bud neck and the vacuole%3B YOL007C is not an essential gene [Source:SGD%3BAcc:S000005367]	XV	311342	312367	-	854155
2030	YDR507C	3332.18	-1.0139	0.458476	0.00280205	0.0148757	GIN4	Protein kinase involved in bud growth and assembly of the septin ring%3B proposed to have kinase-dependent and kinase-independent activities%3B undergoes autophosphorylation%3B similar to Hsl1p%3B GIN4 has a paralog%2C KCC4%2C that arose from the whole g	IV	1462358	1465786	-	852119
2056	YDR528W	1562.18	-1.17444	0.403466	0.000345195	0.00262597	HLR1	Protein involved in regulation of cell wall composition and integrity%3B also involved in cell wall response to osmotic stress%3B overproduction suppresses a lysis sensitive PKC mutation%3B HLR1 has a paralog%2C LRE1%2C that arose from the whole genome d	IV	1494586	1495857	+	852141
4484	YLL022C	2045.33	-1.0499	0.29579	4.81363e-05	0.000499812	HIF1	Non-essential component of the HAT-B histone acetyltransferase complex%3B localized to the nucleus%3B has a role in telomeric silencing%3B other members are Hat1p and Hat2p [Source:SGD%3BAcc:S000003945]	XII	99044	100201	-	850638
4589	YLR056W	19488.3	-1.37473	0.644768	0.00202935	0.0113695	ERG3	C-5 sterol desaturase%3B glycoprotein that catalyzes the introduction of a C-5(6) double bond into episterol%2C a precursor in ergosterol biosynthesis%3B transcriptionally down-regulated when ergosterol is in excess%3B mutants are viable%2C but cannot gr	XII	253861	254958	+	850745
1444	YDL211C	870.455	-1.3657	0.337882	4.91685e-06	7.03644e-05	NA	Protein of unknown function%3B green fluorescent protein (GFP)-fusion protein localizes to the vacuole%3B YDL211C has a paralog%2C TDA7%2C that arose from the whole genome duplication [Source:SGD%3BAcc:S000002370]	IV	79294	80412	-	851315
4143	YKL029C	5271.93	-1.11881	0.454182	0.00130203	0.00798811	MAE1	Mitochondrial malic enzyme%3B catalyzes the oxidative decarboxylation of malate to pyruvate%2C which is a key intermediate in sugar metabolism and a precursor for synthesis of several amino acids [Source:SGD%3BAcc:S000001512]	XI	382716	384725	-	853839
2129	YEL046C	19125.5	-1.04196	0.309473	9.44412e-05	0.000889423	GLY1	Threonine aldolase%3B catalyzes the cleavage of L-allo-threonine and L-threonine to glycine%3B involved in glycine biosynthesis [Source:SGD%3BAcc:S000000772]	V	67629	68792	-	856665
7056	YPR145W	20754.4	-1.05078	0.487577	0.0029765	0.0155634	ASN1	Asparagine synthetase%3B catalyzes the synthesis of L-asparagine from L-aspartate in the asparagine biosynthetic pathway%3B ASN1 has a paralog%2C ASN2%2C that arose from the whole genome duplication [Source:SGD%3BAcc:S000006349]	XVI	822620	824338	+	856268
2343	YER145C	12709.9	-2.45815	0.335091	1.37518e-14	1.53437e-12	FTR1	High affinity iron permease%3B involved in the transport of iron across the plasma membrane%3B forms complex with Fet3p%3B expression is regulated by iron%3B protein abundance increases in response to DNA replication stress [Source:SGD%3BAcc:S000000947]	V	460526	461740	-	856888
1063	YCL030C	8826.56	-1.00774	0.372511	0.000809207	0.00536997	HIS4	Multifunctional enzyme containing phosphoribosyl-ATP pyrophosphatase%3B phosphoribosyl-AMP cyclohydrolase%2C and histidinol dehydrogenase activities%3B catalyzes the second%2C third%2C ninth and tenth steps in histidine biosynthesis [Source:SGD%3BAcc:S00	III	65934	68333	-	850327
2243	YER064C	2622.82	-1.1523	0.645711	0.00515309	0.0240929	VHR2	Non-essential nuclear protein%3B null mutation has global effects on transcription%3B VHR2 has a paralog%2C VHR1%2C that arose from the whole genome duplication%3B relative distribution to the nucleus increases upon DNA replication stress [Source:SGD%3BA	V	282705	284222	-	856793
776	YBR070C	1191.91	-1.54598	0.325599	1.65441e-07	3.76851e-06	ALG14	Component of UDP-GlcNAc transferase%3B required for second step of dolichyl-linked oligosaccharide synthesis%3B anchors catalytic subunit Alg13p to ER membrane%3B similar to bacterial and human glycosyltransferases%3B both human homologs ALG13 and ALG14	II	379221	379934	-	852362
4646	YLR112W	361.298	-1.4606	0.435942	5.99684e-05	0.000605478	NA	Putative protein of unknown function%3B conserved across S. cerevisiae strains [Source:SGD%3BAcc:S000004102]	XII	370791	371210	+	850802
2344	YER145C-A	60.6689	-3.36059	0.564441	1.45114e-10	7.23702e-09	NA	Putative protein of unknown function%3B conserved among S. cerevisiae strains%3B overlaps verified ORF LSM5/YER146W [Source:SGD%3BAcc:S000028758]	V	462386	462823	-	31009439
6667	YPL061W	40427.7	-2.10593	1.35608	0.00336181	0.0171957	ALD6	Cytosolic aldehyde dehydrogenase%3B activated by Mg2+ and utilizes NADP+ as the preferred coenzyme%3B required for conversion of acetaldehyde to acetate%3B constitutively expressed%3B locates to the mitochondrial outer surface upon oxidative stress [Sour	XVI	432588	434090	+	856044
1973	YDR451C	1865.63	-1.72063	0.355083	9.19544e-08	2.22019e-06	YHP1	Homeobox transcriptional repressor%3B binds Mcm1p and early cell cycle box (ECB) elements of cell cycle regulated genes%2C thereby restricting ECB-mediated transcription to the M/G1 interval%3B YHP1 has a paralog%2C YOX1%2C that arose from the whole geno	IV	1361120	1362181	-	852062
6150	YOL140W	2549.06	-1.75298	0.308135	9.51693e-10	3.66374e-08	ARG8	Acetylornithine aminotransferase%3B catalyzes the fourth step in the biosynthesis of the arginine precursor ornithine [Source:SGD%3BAcc:S000005500]	XV	58759	60030	+	854025
225	tG(GCC)D2	48.4861	-1.25177	0.845467	0.00707375	0.0305755	NA	NA	NA	NA	NA	NA	851854
156	tA(AGC)H	5.32488	-4.05673	3.23179	0.00348584	0.0176518	NA	NA	NA	NA	NA	NA	856414
4909	YLR343W	1847.69	-1.61158	0.491643	6.95725e-05	0.000684598	GAS2	1%2C3-beta-glucanosyltransferase%3B involved with Gas4p in spore wall assembly%3B has similarity to Gas1p [Source:SGD%3BAcc:S000004335]	XII	816094	817761	+	851056
243	tH(GUG)E2	52.4603	-1.43961	1.16413	0.00861019	0.0357834	NA	NA	NA	NA	NA	NA	856871
6281	YOR095C	5790.99	-1.01758	1.09147	0.0148374	0.0548547	RKI1	Ribose-5-phosphate ketol-isomerase%3B catalyzes the interconversion of ribose 5-phosphate and ribulose 5-phosphate in the pentose phosphate pathway%3B participates in pyridoxine biosynthesis [Source:SGD%3BAcc:S000005621]	XV	503552	504328	-	854262
6922	YPR017C	883.964	-1.38493	0.260577	1.07557e-08	3.21841e-07	DSS4	Guanine nucleotide dissociation stimulator for Sec4p%3B functions in the post-Golgi secretory pathway%3B binds zinc%2C found both on membranes and in the cytosol [Source:SGD%3BAcc:S000006221]	XVI	593486	593917	-	856128
1025	YBR296C	9494.72	-1.51567	1.15856	0.00633576	0.0282181	PHO89	Plasma membrane Na+/Pi cotransporter%3B active in early growth phase%3B similar to phosphate transporters of Neurospora crassa%3B transcription regulated by inorganic phosphate concentrations and Pho4p%3B mutations in related human transporter genes hPit	II	796798	798522	-	852599
5185	YML123C	40304.1	-1.45331	1.05883	0.00633975	0.0282181	PHO84	High-affinity inorganic phosphate (Pi) transporter%3B also low-affinity manganese transporter%3B regulated by Pho4p and Spt7p%3B mutation confers resistance to arsenate%3B exit from the ER during maturation requires Pho86p%3B cells overexpressing Pho84p	XIII	24037	25800	-	854916
3599	YIL123W	8306.85	-1.21036	0.256787	2.66081e-07	5.74299e-06	SIM1	Protein of the SUN family (Sim1p%2C Uth1p%2C Nca3p%2C Sun4p)%3B may participate in DNA replication%3B promoter contains SCB regulation box at -300 bp indicating that expression may be cell cycle-regulated%3B SIM1 has a paralog%2C SUN4%2C that arose from	IX	128151	129581	+	854683
6242	YOR058C	2455.91	-1.03578	0.149684	6.658e-13	5.09647e-11	ASE1	Mitotic spindle midzone-localized microtubule bundling protein%3B microtubule-associated protein (MAP) family member%3B required for spindle elongation and stabilization%3B undergoes cell cycle-regulated degradation by anaphase promoting complex%3B poten	XV	433688	436345	-	854223
873	YBR156C	1294.89	-1.168	0.192215	1.4857e-10	7.35364e-09	SLI15	Subunit of the conserved chromosomal passenger complex (CPC)%3B complex regulates kinetochore-microtubule attachments%2C activation of the spindle tension checkpoint%2C and mitotic spindle disassembly%3B other complex members are Ipl1p%2C Bir1p%2C and Nb	II	551104	553200	-	852453
3272	YHR061C	1318.28	-2.37708	0.196545	7.50555e-35	7.05844e-32	GIC1	Protein involved in initiation of budding and cellular polarization%3B interacts with Cdc42p via the Cdc42/Rac-interactive binding (CRIB) domain%3B relocalizes from bud neck to nucleus upon DNA replication stress%3B GIC1 has a paralog%2C GIC2%2C that aro	VIII	221534	222478	-	856458
2830	YGR014W	6558.62	-2.27672	0.386723	2.46196e-10	1.14134e-08	MSB2	Mucin family member involved in various signaling pathways%3B functions as osmosensor in the Sho1p-mediated HOG pathway%3B functions in Cdc42p- and MAP kinase-dependent filamentous growth signaling pathway%3B processed into secreted and cell-associated f	VII	516943	520863	+	852897
5341	YMR132C	605.009	-1.18258	0.230161	3.23778e-08	8.60576e-07	JLP2	Protein of unknown function%3B contains sequence that closely resembles a J domain (typified by the E. coli DnaJ protein) [Source:SGD%3BAcc:S000004739]	XIII	534944	535570	-	855162
3724	YJL019W	1523	-1.1983	0.303383	8.25955e-06	0.000112109	MPS3	Nuclear envelope protein%3B required for SPB insertion%2C SPB duplication%2C Kar5p localization near the SPB and nuclear fusion%3B interacts with Mps2p to tether half-bridge to core SPB%3B N-terminal acetylation by Eco1p regulates its role in nuclear org	X	402897	404945	+	853434
1121	YCR014C	1739.51	-1.06871	0.124045	9.91954e-19	1.9788e-16	POL4	DNA polymerase IV%3B undergoes pair-wise interactions with Dnl4p-Lif1p and Rad27p to mediate repair of DNA double-strand breaks by non-homologous end joining (NHEJ)%3B homologous to mammalian DNA polymerase beta [Source:SGD%3BAcc:S000000607]	III	139185	140933	-	850372
2162	YEL075W-A	17.1846	-1.32042	0.803501	0.00550038	0.0253387	YEL075W-A	Dubious open reading frame%3B unlikely to encode a functional protein%2C based on available experimental and comparative sequence data [Source:SGD%3BAcc:S000002956]	V	4870	5481	+	NA
3694	YIR030W-A	19.2433	-1.93433	0.710746	0.000351678	0.00266346	NA	Dubious open reading frame%3B unlikely to encode a functional protein%2C based on available experimental and comparative sequence data%3B overlaps ORF DAL7/YIR031C [Source:SGD%3BAcc:S000028802]	IX	412899	413282	+	NA

## Sheet: cluster 6 (n=201)
	GeneID	baseMean	log2FoldChange	lfcSE	pvalue	padj	GeneName	Description	Chromosome	Start	Stop	Strand	Entrez_ID
1261	YDL037C	2860.81	4.80231	0.612205	2.02633e-16	2.89985e-14	BSC1	Protein of unconfirmed function%3B similar to cell surface flocculin Flo11p%3B ORF exhibits genomic organization compatible with a translational readthrough-dependent mode of expression%3B in W303 strain one continuous open reading frame comprising of YD	IV	384601	385587	-	851524
1262	YDL039C	8407.36	4.59611	0.698384	2.12391e-12	1.51975e-10	PRM7	Pheromone-regulated protein%3B predicted to have one transmembrane segment%3B promoter contains Gcn4p binding elements%3B in W303 strain one continuous open reading frame comprising of YDL037C%2C the intergenic region and YDL039C encodes the IMI1 [Source	IV	381985	384081	-	851522
190	tD(GUC)O	14.5095	3.77969	2.58714	0.00175621	0.0101769	NA	NA	NA	NA	NA	NA	854298
1858	YDR345C	74822.2	3.41436	0.764277	3.46014e-07	7.18551e-06	HXT3	Low affinity glucose transporter of the major facilitator superfamily%3B expression is induced in low or high glucose conditions%3B HXT3 has a paralog%2C HXT5%2C that arose from the whole genome duplication [Source:SGD%3BAcc:S000002753]	IV	1162957	1164660	-	851946
3456	YHR216W	3301.14	3.38016	0.674656	2.47298e-08	6.81155e-07	IMD2	Inosine monophosphate dehydrogenase%3B catalyzes the rate-limiting step in GTP biosynthesis%2C expression is induced by mycophenolic acid resulting in resistance to the drug%2C expression is repressed by nutrient limitation%3B IMD2 has a paralog%2C YAR07	VIII	554396	555967	+	856626
6037	YOL035C	6.32547	3.3549	1.97125	0.00266309	0.0143206	YOL035C	Dubious open reading frame%3B unlikely to encode a functional protein%2C based on available experimental and comparative sequence data [Source:SGD%3BAcc:S000005395]	XV	258803	259105	-	NA
3455	YHR215W	6865.56	3.23641	0.361113	1.71027e-20	3.75291e-18	PHO12	One of three repressible acid phosphatases%3B glycoprotein that is transported to the cell surface by the secretory pathway%3B pregulated by phosphate starvation%3B PHO12 has a paralog%2C PHO11%2C that arose from a segmental duplication [Source:SGD%3BAcc	VIII	552099	553502	+	856625
2325	YER131W	34987.9	3.11921	0.592216	6.91109e-09	2.12597e-07	RPS26B	Protein component of the small (40S) ribosomal subunit%3B homologous to mammalian ribosomal protein S26%2C no bacterial homolog%3B RPS26B has a paralog%2C RPS26A%2C that arose from the whole genome duplication%3B human homolog can partially complement an	V	423952	424311	+	856868
803	YBR093C	5519.89	2.94138	0.228775	4.51638e-39	4.95522e-36	PHO5	Repressible acid phosphatase%3B 1 of 3 repressible acid phosphatases that also mediates extracellular nucleotide-derived phosphate hydrolysis%3B secretory pathway derived cell surface glycoprotein%3B induced by phosphate starvation and coordinately regul	II	429548	430951	-	852390
6146	YOL136C	5733.31	2.88088	0.415429	2.17582e-13	1.9356e-11	PFK27	6-phosphofructo-2-kinase%3B catalyzes synthesis of fructose-2%2C6-bisphosphate%3B inhibited by phosphoenolpyruvate and sn-glycerol 3-phosphate%2C expression induced by glucose and sucrose%2C transcriptional regulation involves protein kinase A [Source:SG	XV	67561	68754	-	853984
6247	YOR063W	120328	2.86633	0.45192	1.20032e-11	7.59782e-10	RPL3	Ribosomal 60S subunit protein L3%3B homologous to mammalian ribosomal protein L3 and bacterial L3%3B plays an important role in function of eIF5B in stimulating 3' end processing of 18S rRNA in context of 80S ribosomes that have not yet engaged in transl	XV	444686	445849	+	854229
2577	YGL031C	36348.2	2.80849	0.672846	NA	NA	RPL24A	Ribosomal 60S subunit protein L24A%3B not essential for translation but may be required for normal translation rate%3B homologous to mammalian ribosomal protein L24%2C no bacterial homolog%3B RPL24A has a paralog%2C RPL24B%2C that arose from the whole ge	VII	437467	437934	-	852852
3905	YJL190C	33950.9	2.75508	0.66115	1.4765e-06	2.50511e-05	RPS22A	Protein component of the small (40S) ribosomal subunit%3B homologous to mammalian ribosomal protein S15A and bacterial S8%3B RPS22A has a paralog%2C RPS22B%2C that arose from the whole genome duplication [Source:SGD%3BAcc:S000003726]	X	74910	75302	-	853249
3155	YHL015W	59814.7	2.69603	0.407615	2.06626e-12	1.49475e-10	RPS20	Protein component of the small (40S) ribosomal subunit%3B overproduction suppresses mutations affecting RNA polymerase III-dependent transcription%3B homologous to mammalian ribosomal protein S20 and bacterial S10 [Source:SGD%3BAcc:S000001007]	VIII	75412	75777	+	856371
2805	YGL253W	54034.8	2.65209	0.345035	8.66355e-16	1.09677e-13	HXK2	Hexokinase isoenzyme 2%3B phosphorylates glucose in cytosol%3B predominant hexokinase during growth on glucose%3B represses expression of HXK1%2C GLK1%2C induces expression of its own gene%3B antiapoptotic%3B phosphorylation/dephosphorylation at Ser14 by	VII	23935	25395	+	852639
6130	YOL120C	52721.5	2.63136	0.54744	7.93223e-08	1.94119e-06	RPL18A	Ribosomal 60S subunit protein L18A%3B intron of RPL18A pre-mRNA forms stem-loop structures that are a target for Rnt1p cleavage leading to degradation%3B homologous to mammalian ribosomal protein L18%2C no bacterial homolog%3B RPL18A has a paralog%2C RPL	XV	93395	94402	-	854029
2576	YGL030W	43350.7	2.57118	0.662032	4.88938e-06	7.01238e-05	RPL30	Ribosomal 60S subunit protein L30%3B involved in pre-rRNA processing in the nucleolus%3B autoregulates splicing of its transcript%3B homologous to mammalian ribosomal protein L30%2C no bacterial homolog [Source:SGD%3BAcc:S000002998]	VII	439091	439638	+	852853
6739	YPL131W	71575.1	2.55438	0.51218	3.24203e-08	8.60576e-07	RPL5	Ribosomal 60S subunit protein L5%3B nascent Rpl5p is bound by specific chaperone Syo1p during translation%3B homologous to mammalian ribosomal protein L5 and bacterial L18%3B binds 5S rRNA and is required for 60S subunit assembly [Source:SGD%3BAcc:S00000	XVI	303121	304014	+	855972
2706	YGL157W	3279.87	2.53195	0.42762	1.81215e-10	8.70758e-09	ARI1	NADPH-dependent aldehyde reductase%3B utilizes aromatic and alophatic aldehyde substrates%3B member of the short-chain dehydrogenase/reductase superfamily [Source:SGD%3BAcc:S000003125]	VII	209006	210049	+	852720
5878	YNL302C	38278.4	2.49131	0.445492	1.24745e-09	4.58304e-08	RPS19B	Protein component of the small (40S) ribosomal subunit%3B required for assembly and maturation of pre-40 S particles%3B homologous to mammalian ribosomal protein S19%2C no bacterial homolog%3B mutations in human RPS19 are associated with Diamond Blackfan	XIV	61958	62943	-	855414
2514	YFR032C-A	15902.7	2.45793	0.499643	4.69033e-08	1.23014e-06	RPL29	Ribosomal 60S subunit protein L29%3B not essential for translation%2C but required for proper joining of large and small ribosomal subunits and for normal translation rate%3B homologous to mammalian ribosomal protein L29%2C no bacterial homolog [Source:S	VI	223258	223437	-	850592
4977	YLR406C	16870	2.45658	0.52589	1.61019e-07	3.69333e-06	RPL31B	Ribosomal 60S subunit protein L31B%3B associates with karyopherin Sxm1p%3B loss of both Rpl31p and Rpl39p confers lethality%3B homologous to mammalian ribosomal protein L31%2C no bacterial homolog%3B RPL31B has a paralog%2C RPL31A%2C that arose from the	XII	931065	931755	-	851122
5751	YNL178W	63476.3	2.42713	0.620477	4.55877e-06	6.6248e-05	RPS3	Protein component of the small (40S) ribosomal subunit%3B has apurinic/apyrimidinic (AP) endonuclease activity%3B essential for viability%3B nascent Rps3p is bound by specific chaperone Yar1p during translation%3B homologous to mammalian ribosomal protei	XIV	302680	303402	+	855543
2853	YGR034W	30957.9	2.42049	0.47705	2.1533e-08	5.98108e-07	RPL26B	Ribosomal 60S subunit protein L26B%3B binds to 5.8S rRNA%3B non-essential even when paralog is also deleted%3B deletion has minimal affections on ribosome biosynthesis%3B homologous to mammalian ribosomal protein L26 and bacterial L24%3B RPL26B has a par	VII	555812	556672	+	852922
5323	YMR116C	71565.4	2.39119	0.410736	3.34107e-10	1.4861e-08	ASC1	G-protein beta subunit and guanine dissociation inhibitor for Gpa2p%3B ortholog of RACK1 that inhibits translation%3B core component of the small (40S) ribosomal subunit%3B required to prevent frameshifting at ribosomes stalled at repeated CGA codons%3B	XIII	499456	500688	-	855143
3176	YHL033C	19281.3	2.3694	0.738486	6.11102e-05	0.000614181	RPL8A	Ribosomal 60S subunit protein L8A%3B required for processing of 27SA3 pre-rRNA to 27SB pre-rRNA during assembly of large ribosomal subunit%3B depletion leads to a turnover of pre-rRNA%3B L8 binds to Domain I of 25S and 5.8 S rRNAs%3B mutation results in	VIII	35255	36025	-	856352
4561	YLR029C	50497.2	2.3567	0.508989	1.98063e-07	4.40489e-06	RPL15A	Ribosomal 60S subunit protein L15A%3B binds to 5.8 S rRNA%3B homologous to mammalian ribosomal protein L15%2C no bacterial homolog%3B RPL15A has a paralog%2C RPL15B%2C that arose from the whole genome duplication [Source:SGD%3BAcc:S000004019]	XII	201976	202590	-	850716
4720	YLR167W	112306	2.35423	0.482733	5.90489e-08	1.50666e-06	RPS31	Fusion protein cleaved to yield ribosomal protein S31 and ubiquitin%3B ubiquitin may facilitate assembly of the ribosomal protein into ribosomes%3B interacts genetically with translation factor eIF2B%3B homologous to mammalian ribosomal protein S27A%2C n	XII	498947	499405	+	850864
4507	YLL045C	23710.5	2.32942	0.540779	8.8871e-07	1.62963e-05	RPL8B	Ribosomal 60S subunit protein L8B%3B required for processing of 27SA3 pre-rRNA to 27SB pre-rRNA during assembly of large ribosomal subunit%3B depletion leads to a turnover of pre-rRNA%3B L8 binds to Domain I of 25S and 5.8 S rRNAs%3B mutation results in	XII	47859	48629	-	850682
966	YBR238C	3758.24	2.31546	0.44188	9.15215e-09	2.79598e-07	YBR238C	Mitochondrial membrane protein%3B not required for respiratory growth but causes a synthetic respiratory defect in combination with rmd9 mutations%3B transcriptionally up-regulated by TOR%3B deletion increases life span%3B YBR238C has a paralog%2C RMD9%2	II	695107	697302	-	852540
3523	YIL053W	49447.1	2.27683	0.323492	1.19594e-13	1.17505e-11	YIL053W	Constitutively expressed DL-glycerol-3-phosphate phosphatase%3B also known as glycerol-1-phosphatase%3B involved in glycerol biosynthesis%2C induced in response to both anaerobic and osmotic stress%3B GPP1 has a paralog%2C GPP2%2C that arose from the who	IX	255115	255867	+	854758
4118	YKL006W	37972.6	2.27167	0.616667	1.15958e-05	0.00015086	RPL14A	Ribosomal 60S subunit protein L14A%3B N-terminally acetylated%3B homologous to mammalian ribosomal protein L14%2C no bacterial homolog%3B RPL14A has a paralog%2C RPL14B%2C that arose from the whole genome duplication [Source:SGD%3BAcc:S000001489]	XI	431906	432720	+	853864
2707	YGL158W	280.238	2.23796	0.411235	3.44942e-09	1.16449e-07	RCK1	Protein kinase involved in oxidative stress response%3B promotes pseudohyphal growth via activation of Ubp3p phosphorylation%3B identified as suppressor of S. pombe cell cycle checkpoint mutations%3B RCK1 has a paralog%2C RCK2%2C that arose from the whol	VII	207033	208571	+	852719
3482	YIL018W	65574.1	2.22262	0.530406	1.50639e-06	2.52974e-05	RPL2B	Ribosomal 60S subunit protein L2B%3B homologous to mammalian ribosomal protein L2 and bacterial L2%3B RPL2B has a paralog%2C RPL2A%2C that arose from the whole genome duplication%3B expression is upregulated at low temperatures [Source:SGD%3BAcc:S0000012	IX	316768	317932	+	854794
6282	YOR096W	35556.3	2.21751	0.477075	1.89095e-07	4.21971e-06	RPS7A	Protein component of the small (40S) ribosomal subunit%3B interacts with Kti11p%3B deletion causes hypersensitivity to zymocin%3B homologous to mammalian ribosomal protein S7%2C no bacterial homolog%3B RPS7A has a paralog%2C RPS7B%2C that arose from the	XV	505794	506767	+	854263
4093	YJR145C	51455.9	2.18751	0.463798	1.37349e-07	3.20628e-06	RPS4A	Protein component of the small (40S) ribosomal subunit%3B mutation affects 20S pre-rRNA processing%3B homologous to mammalian ribosomal protein S4%2C no bacterial homolog%3B RPS4A has a paralog%2C RPS4B%2C that arose from the whole genome duplication [So	X	702027	703068	-	853610
675	YBL092W	53072.4	2.17923	0.533919	2.43466e-06	3.87639e-05	RPL32	Ribosomal 60S subunit protein L32%3B overexpression disrupts telomeric silencing%3B homologous to mammalian ribosomal protein L32%2C no bacterial homolog [Source:SGD%3BAcc:S000000188]	II	45978	46370	+	852185
6623	YPL019C	18331.4	2.16177	0.282856	1.36607e-15	1.69676e-13	VTC3	Regulatory subunit of the vacuolar transporter chaperone (VTC) complex%3B involved in membrane trafficking%2C vacuolar polyphosphate accumulation%2C microautophagy and non-autophagic vacuolar fusion%3B VTC3 has a paralog%2C VTC2%2C that arose from the wh	XVI	514511	517018	-	856088
1361	YDL133C-A	17661.2	2.14818	0.509631	1.38565e-06	2.37171e-05	RPL41B	Ribosomal 60S subunit protein L41B%3B comprises only 25 amino acids%3B rpl41a rpl41b double null mutant is viable%3B homologous to mammalian ribosomal protein L41%2C no bacterial homolog%3B RPL41B has a paralog%2C RPL41A%2C that arose from the whole geno	IV	221724	221801	-	851422
2512	YFR031C-A	42127.1	2.14505	0.551625	5.44813e-06	7.72954e-05	RPL2A	Ribosomal 60S subunit protein L2A%3B homologous to mammalian ribosomal protein L2 and bacterial L2%3B RPL2A has a paralog%2C RPL2B%2C that arose from the whole genome duplication [Source:SGD%3BAcc:S000002104]	VI	220507	221418	-	850590
3400	YHR174W	263835	2.14497	0.490921	7.00259e-07	1.32466e-05	ENO2	Enolase II%2C a phosphopyruvate hydratase%3B catalyzes conversion of 2-phosphoglycerate to phosphoenolpyruvate during glycolysis and the reverse reaction during gluconeogenesis%3B expression induced in response to glucose%3B ENO2 has a paralog%2C ENO1%2C	VIII	451327	452640	+	856579
908	YBR189W	54879.9	2.13433	0.653947	5.44406e-05	0.000556494	RPS9B	Protein component of the small (40S) ribosomal subunit%3B homologous to mammalian ribosomal protein S9 and bacterial S4%3B RPS9B has a paralog%2C RPS9A%2C that arose from the whole genome duplication [Source:SGD%3BAcc:S000000393]	II	604508	605508	+	852487
3892	YJL177W	27127.8	2.11936	0.556728	7.65469e-06	0.000104981	RPL17B	Ribosomal 60S subunit protein L17B%3B required for processing of 27SB pre-rRNA and formation of stable 66S assembly intermediates%3B homologous to mammalian ribosomal protein L17 and bacterial L22%3B RPL17B has a paralog%2C RPL17A%2C that arose from the	X	90786	91657	+	853262
3992	YJR047C	1343.85	2.1022	0.705873	0.000136337	0.00120149	ANB1	Translation elongation factor eIF-5A%3B previously thought to function in translation initiation%3B undergoes an essential hypusination modification%3B expressed under anaerobic conditions%3B ANB1 has a paralog%2C HYP2%2C that arose from the whole genome	X	524908	525381	-	853506
6574	YOR369C	62615.9	2.09835	0.51144	2.2775e-06	3.65678e-05	RPS12	Protein component of the small (40S) ribosomal subunit%3B homologous to mammalian ribosomal protein S12%2C no bacterial homolog [Source:SGD%3BAcc:S000005896]	XV	1028194	1028625	-	854551
3953	YJR009C	90868.1	2.09092	0.471726	5.3872e-07	1.06419e-05	TDH2	Glyceraldehyde-3-phosphate dehydrogenase (GAPDH)%2C isozyme 2%3B involved in glycolysis and gluconeogenesis%3B tetramer that catalyzes reaction of glyceraldehyde-3-phosphate to 1%2C3 bis-phosphoglycerate%3B detected in cytoplasm and cell wall%3B protein	X	453683	454681	-	853465
910	YBR191W	32860.2	2.04064	0.659746	9.89493e-05	0.000918736	RPL21A	Ribosomal 60S subunit protein L21A%3B homologous to mammalian ribosomal protein L21%2C no bacterial homolog%3B RPL21A has a paralog%2C RPL21B%2C that arose from the whole genome duplication [Source:SGD%3BAcc:S000000395]	II	606270	607140	+	852489
3541	YIL069C	21393.2	2.03743	0.479079	1.24122e-06	2.18475e-05	RPS24B	Protein component of the small (40S) ribosomal subunit%3B homologous to mammalian ribosomal protein S24%2C no bacterial homolog%3B RPS24B has a paralog%2C RPS24A%2C that arose from the whole genome duplication [Source:SGD%3BAcc:S000001331]	IX	231553	232369	-	854741
794	YBR085W	831.369	2.0188	0.34096	2.02205e-10	9.57638e-09	AAC3	Mitochondrial inner membrane ADP/ATP translocator%3B exchanges cytosolic ADP for mitochondrially synthesized ATP%3B expressed under anaerobic conditions%3B similar to Aac1p%3B has roles in maintenance of viability and in respiration%3B AAC3 has a paralog	II	415983	416906	+	852380
6235	YOR051C	8135.15	1.99421	0.210374	1.83043e-22	4.8199e-20	ETT1	Nuclear protein that inhibits replication of Brome mosaic virus%3B S. cerevisiae is a model system for studying replication of positive-strand RNA viruses in their natural hosts%3B deletion increases stop codon readthrough [Source:SGD%3BAcc:S000005577]	XV	424846	426084	-	854216
4738	YLR185W	18608.1	1.98397	0.588029	3.96723e-05	0.00041853	RPL37A	Ribosomal 60S subunit protein L37A%3B required for processing of 27SB pre-rRNA and formation of stable 66S assembly intermediates%3B homologous to mammalian ribosomal protein L37%2C no bacterial homolog%3B RPL37A has a paralog%2C RPL37B%2C that arose fro	XII	522663	523288	+	850882
6231	YOR047C	3433.78	1.97998	0.407109	7.16743e-08	1.7805e-06	STD1	Protein involved in control of glucose-regulated gene expression%3B interacts with kinase Snf1p%2C glucose sensors Snf3p and Rgt2p%2C TATA-binding Spt15p%3B regulator of transcription factor Rgt1p%3B interactions with Pma1p appear to propagate [GAR+]%3B	XV	416347	417681	-	854212
1307	YDL083C	34574.9	1.976	0.433204	3.11747e-07	6.59882e-06	RPS16B	Protein component of the small (40S) ribosomal subunit%3B homologous to mammalian ribosomal protein S16 and bacterial S9%3B RPS16B has a paralog%2C RPS16A%2C that arose from the whole genome duplication [Source:SGD%3BAcc:S000002241]	IV	306926	307789	-	851476
4958	YLR388W	8499.57	1.95252	0.374866	1.23259e-08	3.60628e-07	RPS29A	Protein component of the small (40S) ribosomal subunit%3B homologous to mammalian ribosomal protein S29 and bacterial S14%3B RPS29A has a paralog%2C RPS29B%2C that arose from the whole genome duplication [Source:SGD%3BAcc:S000004380]	XII	898651	898821	+	851104
1299	YDL075W	35683.7	1.94785	0.515827	9.15953e-06	0.000122555	RPL31A	Ribosomal 60S subunit protein L31A%3B associates with karyopherin Sxm1p%3B loss of both Rpl31p and Rpl39p confers lethality%3B homologous to mammalian ribosomal protein L31%2C no bacterial homolog%3B RPL31A has a paralog%2C RPL31B%2C that arose from the	IV	322226	322988	+	851484
5354	YMR143W	34449.3	1.90007	0.419274	3.68295e-07	7.60027e-06	RPS16A	Protein component of the small (40S) ribosomal subunit%3B homologous to mammalian ribosomal protein S16 and bacterial S9%3B RPS16A has a paralog%2C RPS16B%2C that arose from the whole genome duplication [Source:SGD%3BAcc:S000004751]	XIII	551928	552903	+	855174
4446	YKR094C	27954.5	1.89008	0.598666	8.5695e-05	0.00081758	RPL40B	Ubiquitin-ribosomal 60S subunit protein L40B fusion protein%3B cleaved to yield ubiquitin and ribosomal protein L40B%3B ubiquitin may facilitate assembly of the ribosomal protein into ribosomes%3B homologous to mammalian ribosomal protein L40%2C no bacte	XI	617996	618750	-	853969
2310	YER117W	34588.6	1.87176	0.383935	7.11742e-08	1.77477e-06	RPL23B	Ribosomal 60S subunit protein L23B%3B homologous to mammalian ribosomal protein L23 and bacterial L14%3B RPL23B has a paralog%2C RPL23A%2C that arose from the whole genome duplication [Source:SGD%3BAcc:S000000919]	V	396769	397653	+	856853
751	YBR048W	21279.5	1.86465	0.541079	3.24504e-05	0.000359632	RPS11B	Protein component of the small (40S) ribosomal subunit%3B homologous to mammalian ribosomal protein S11 and bacterial S17%3B RPS11B has a paralog%2C RPS11A%2C that arose from the whole genome duplication [Source:SGD%3BAcc:S000000252]	II	332831	333812	+	852337
5436	YMR215W	5005.56	1.86393	0.459764	3.08414e-06	4.72161e-05	GAS3	Putative 1%2C3-beta-glucanosyltransferase%3B has similarity go other GAS family members%3B low abundance%2C possibly inactive member of the GAS family of GPI-containing proteins%3B localizes to the cell wall%3B mRNA induced during sporulation [Source:SGD	XIII	696796	698370	+	855255
3210	YHR010W	33493.5	1.84459	0.565083	6.15438e-05	0.000617596	RPL27A	Ribosomal 60S subunit protein L27A%3B homologous to mammalian ribosomal protein L27%2C no bacterial homolog%3B RPL27A has a paralog%2C RPL27B%2C that arose from the whole genome duplication [Source:SGD%3BAcc:S000001052]	VIII	126521	127492	+	856401
802	YBR092C	6149.78	1.83445	0.462456	4.49568e-06	6.5621e-05	PHO3	Constitutively expressed acid phosphatase similar to Pho5p%3B brought to the cell surface by transport vesicles%3B hydrolyzes thiamin phosphates in the periplasmic space%2C increasing cellular thiamin uptake%3B expression is repressed by thiamin [Source:	II	427698	429101	-	852389
730	YBR027C	23.1247	1.82265	0.712132	0.000565556	0.00397762	NA	Putative protein of unknown function%3B conserved among S. cerevisiae strains%3B YBR027C is not an essential gene [Source:SGD%3BAcc:S000000231]	II	294024	294356	-	852315
5158	YML099W-A	60.6462	1.80353	0.535282	5.2131e-05	0.000536216	YML099W-A	Dubious open reading frame%3B unlikely to encode a functional protein%2C based on available experimental and comparative sequence data%3B partially overlaps the verified ORF ARG81/YML099C [Source:SGD%3BAcc:S000004567]	XIII	74229	74558	+	NA
4277	YKL153W	130.284	1.79927	0.746702	0.000771669	0.00515385	NA	Dubious open reading frame%3B unlikely to encode a functional protein%2C based on available experimental and comparative sequence data%3B transcription of both YLK153W and the overlapping essential gene GPM1 is reduced in the gcr1 null mutant [Source:SGD	XI	163600	164109	+	NA
3435	YHR203C	32924.6	1.78618	0.516316	3.22667e-05	0.000358804	RPS4B	Protein component of the small (40S) ribosomal subunit%3B homologous to mammalian ribosomal protein S4%2C no bacterial homolog%3B RPS4B has a paralog%2C RPS4A%2C that arose from the whole genome duplication [Source:SGD%3BAcc:S000001246]	VIII	504476	505530	-	856610
5680	YNL112W	41530.5	1.78294	0.427234	1.90584e-06	3.12157e-05	DBP2	ATP-dependent RNA helicase of the DEAD-box protein family%3B has strong preference for dsRNA%3B interacts with YRA1%3B required for assembly of Yra1p%2C Nab2p and Mex67p onto mRNA and formation of nuclear mRNP%3B involved in mRNA decay and rRNA processin	XIV	413639	416281	+	855611
1905	YDR384C	2138.01	1.78159	0.277369	9.77909e-12	6.31135e-10	ATO3	Plasma membrane protein%2C putative ammonium transporter%3B regulation pattern suggests a possible role in export of ammonia from the cell%3B phosphorylated in mitochondria%3B member of the TC 9.B.33 YaaH family of putative transporters [Source:SGD%3BAcc	IV	1241204	1242031	-	851992
5605	YNL043C	45.4351	1.77388	0.527737	4.96725e-05	0.000513334	NA	Dubious open reading frame%3B unlikely to encode a functional protein%2C based on available experimental and comparative sequence data%3B partially overlaps the verified gene YIP3/YNL044W [Source:SGD%3BAcc:S000004988]	XIV	545589	545909	-	NA
4805	YLR249W	185405	1.77238	0.400318	6.298e-07	1.21227e-05	YEF3	Translation elongation factor 3%3B contains two ABC cassettes%3B binds and hydrolyzes ATP%3B YEF3 has a paralog%2C HEF3%2C that arose from the whole genome duplication [Source:SGD%3BAcc:S000004239]	XII	636780	639914	+	850951
6042	YOL039W	43578.5	1.76938	0.417845	1.50232e-06	2.52974e-05	RPP2A	Ribosomal protein P2 alpha%3B a component of the ribosomal stalk%2C which is involved in the interaction between translational elongation factors and the ribosome%3B free (non-ribosomal) P2 stimulates the phosphorylation of the eIF2 alpha subunit (Sui2p)	XV	254297	254617	+	854118
1940	YDR418W	5284.65	1.74758	0.468854	1.23847e-05	0.000159235	RPL12B	Ribosomal 60S subunit protein L12B%3B rpl12a rpl12b double mutant exhibits slow growth and slow translation%3B homologous to mammalian ribosomal protein L12 and bacterial L11%3B RPL12B has a paralog%2C RPL12A%2C that arose from the whole genome duplicati	IV	1301616	1302113	+	852026
2296	YER102W	44251.8	1.7464	0.354334	5.77739e-08	1.48565e-06	RPS8B	Protein component of the small (40S) ribosomal subunit%3B homologous to mammalian ribosomal protein S8%2C no bacterial homolog%3B RPS8B has a paralog%2C RPS8A%2C that arose from the whole genome duplication [Source:SGD%3BAcc:S000000904]	V	363100	363702	+	856839
4069	YJR123W	98886.9	1.70907	0.430229	4.70153e-06	6.77246e-05	RPS5	Protein component of the small (40S) ribosomal subunit%3B least basic of non-acidic ribosomal proteins%3B phosphorylated in vivo%3B essential for viability%3B homologous to mammalian ribosomal protein S5 and bacterial S7 [Source:SGD%3BAcc:S000003884]	X	651901	652578	+	853587
2256	YER074W	32597.2	1.7078	0.661059	0.000511326	0.00364548	RPS24A	Protein component of the small (40S) ribosomal subunit%3B homologous to mammalian ribosomal protein S24%2C no bacterial homolog%3B RPS24A has a paralog%2C RPS24B%2C that arose from the whole genome duplication [Source:SGD%3BAcc:S000000876]	V	306323	307196	+	856805
107	snR49	464.331	1.7069	0.428811	4.54911e-06	6.6248e-05	NA	NA	NA	NA	NA	NA	9164966
5077	YML026C	42943.6	1.70466	0.571165	0.000163574	0.00139303	RPS18B	Protein component of the small (40S) ribosomal subunit%3B homologous to mammalian ribosomal protein S18 and bacterial S13%3B RPS18B has a paralog%2C RPS18A%2C that arose from the whole genome duplication%3B protein abundance increases in response to DNA	XIII	222987	223828	-	854982
3221	YHR021C	19077.2	1.69766	0.373057	3.75607e-07	7.72694e-06	RPS27B	Protein component of the small (40S) ribosomal subunit%3B homologous to mammalian ribosomal protein S27%2C no bacterial homolog%3B RPS27B has a paralog%2C RPS27A%2C that arose from the whole genome duplication [Source:SGD%3BAcc:S000001063]	VIII	147871	148669	-	856415
1903	YDR382W	41791.9	1.6866	0.515914	6.59512e-05	0.000653733	RPP2B	Ribosomal protein P2 beta%3B a component of the ribosomal stalk%2C which is involved in the interaction between translational elongation factors and the ribosome%3B free (non-ribosomal) P2 stimulates the phosphorylation of the eIF2 alpha subunit (Sui2p)	IV	1239492	1239824	+	851990
5119	YML063W	48559.3	1.66392	0.697257	0.000863737	0.00567463	RPS1B	Ribosomal protein 10 (rp10) of the small (40S) subunit%3B homologous to mammalian ribosomal protein S3A%2C no bacterial homolog%3B RPS1B has a paralog%2C RPS1A%2C that arose from the whole genome duplication [Source:SGD%3BAcc:S000004528]	XIII	146482	147249	+	854939
4398	YKR047W	128.348	1.66144	0.300747	2.62515e-09	9.14357e-08	NA	Dubious open reading frame%3B unlikely to encode a functional protein%2C based on available experimental and comparative sequence data%3B partially overlaps the verified gene NAP1 [Source:SGD%3BAcc:S000001755]	XI	525257	525562	+	NA
6137	YOL127W	48026.6	1.64761	0.571554	0.000230069	0.00186981	RPL25	Ribosomal 60S subunit protein L25%3B primary rRNA-binding ribosomal protein component of large ribosomal subunit%3B binds to 25S rRNA via a conserved C-terminal motif%3B homologous to mammalian ribosomal protein L23A and bacterial L23 [Source:SGD%3BAcc:S	XV	80348	81190	+	853993
5352	YMR141W-A	876.859	1.63262	0.41621	6.20691e-06	8.65679e-05	NA	Dubious open reading frame%3B unlikely to encode a functional protein%2C based on available experimental and comparative sequence data%3B overlaps the verified gene RPL13B/YMR142C [Source:SGD%3BAcc:S000028575]	XIII	550911	551135	+	NA
2624	YGL076C	58758.6	1.62532	0.47117	3.66878e-05	0.00039528	RPL7A	Ribosomal 60S subunit protein L7A%3B required for processing of 27SA3 pre-rRNA to 27SB pre-rRNA during assembly of large ribosomal subunit%3B depletion leads to a turnover of pre-rRNA%3B contains a conserved C-terminal Nucleic acid Binding Domain (NDB2)%	VII	364335	365996	-	852804
2672	YGL123W	41900.7	1.62451	0.393258	2.55519e-06	4.01451e-05	RPS2	Protein component of the small (40S) subunit%3B essential for control of translational accuracy%3B phosphorylation by C-terminal domain kinase I (CTDK-I) enhances translational accuracy%3B methylated on one or more arginine residues by Hmt1p%3B homologou	VII	277617	278381	+	852754
4306	YKL180W	38014.6	1.61316	0.444227	1.90983e-05	0.000226122	RPL17A	Ribosomal 60S subunit protein L17A%3B required for processing of 27SB pre-rRNA and formation of stable 66S assembly intermediates%3B copurifies with the Dam1 complex (aka DASH complex)%3B homologous to mammalian ribosomal protein L17 and bacterial L22%3B	XI	109269	110129	+	853674
791	YBR084C-A	36418.6	1.61054	0.447379	2.14896e-05	0.000249499	RPL19A	Ribosomal 60S subunit protein L19A%3B rpl19a and rpl19b single null mutations result in slow growth%2C while the double null mutation is lethal%3B homologous to mammalian ribosomal protein L19%2C no bacterial homolog%3B RPL19A has a paralog%2C RPL19B%2C	II	414186	415261	-	852379
2234	YER056C-A	18273.7	1.60199	0.512305	0.000111858	0.00101427	RPL34A	Ribosomal 60S subunit protein L34A%3B homologous to mammalian ribosomal protein L34%2C no bacterial homolog%3B RPL34A has a paralog%2C RPL34B%2C that arose from the whole genome duplication [Source:SGD%3BAcc:S000002135]	V	269423	270185	-	856784
1553	YDR064W	45690.7	1.59775	0.499994	8.95667e-05	0.000847152	RPS13	Protein component of the small (40S) ribosomal subunit%3B homologous to mammalian ribosomal protein S13 and bacterial S15 [Source:SGD%3BAcc:S000002471]	IV	579458	580452	+	851636
6287	YOR101W	6343.16	1.59593	0.261038	7.75153e-11	4.11519e-09	RAS1	GTPase involved in G-protein signaling in adenylate cyclase activation%3B plays a role in cell proliferation%3B localized to the plasma membrane%3B homolog of mammalian RAS proto-oncogenes%3B relative distribution to the nucleus increases upon DNA replic	XV	515244	516173	+	854268
2106	YEL026W	10091.9	1.5833	0.699096	0.00120983	0.00755626	SNU13	RNA binding protein%3B part of U3 snoRNP involved in rRNA processing%2C part of U4/U6-U5 tri-snRNP involved in mRNA splicing%2C similar to human 15.5K protein [Source:SGD%3BAcc:S000000752]	V	101943	102323	+	856687
5679	YNL111C	2933.31	1.58204	0.278808	1.13685e-09	4.22818e-08	CYB5	Cytochrome b5%3B involved in the sterol and lipid biosynthesis pathways%3B acts as an electron donor to support sterol C5-6 desaturation [Source:SGD%3BAcc:S000005055]	XIV	416940	417302	-	855612
1462	YDL229W	44904.5	1.56019	0.564338	0.000345449	0.00262597	SSB1	Cytoplasmic ATPase that is a ribosome-associated molecular chaperone%3B functions with J-protein partner Zuo1p%3B may be involved in folding of newly-made polypeptide chains%3B member of the HSP70 family%3B interacts with phosphatase subunit Reg1p%3B SSB	IV	44065	45906	+	851369
5018	YLR441C	62280.8	1.54756	0.412855	1.27896e-05	0.000163801	RPS1A	Ribosomal protein 10 (rp10) of the small (40S) subunit%3B homologous to mammalian ribosomal protein S3A%2C no bacterial homolog%3B RPS1A has a paralog%2C RPS1B%2C that arose from the whole genome duplication [Source:SGD%3BAcc:S000004433]	XII	1018141	1018908	-	851162
4905	YLR340W	19307.2	1.53267	0.61613	0.000744778	0.00499274	RPP0	Conserved ribosomal protein P0 of the ribosomal stalk%3B involved in interaction between translational elongation factors and the ribosome%3B phosphorylated on serine 302%3B homologous to mammalian ribosomal protein LP0 and bacterial L10 [Source:SGD%3BAc	XII	805887	806825	+	851052
4607	YLR074C	6515.53	1.53261	0.291732	1.21322e-08	3.56547e-07	BUD20	C2H2-type zinc finger protein required for ribosome assembly%3B shuttling factor which associates with pre-60S particles in the nucleus%2C accompanying them to the cytoplasm%3B cytoplasmic dissociation of Bud20p requires Drg1p%3B N-terminus harbors a nuc	XII	281956	282456	-	850763
3365	YHR141C	38230.1	1.50903	0.272902	2.68794e-09	9.31302e-08	RPL42B	Ribosomal 60S subunit protein L42B%3B required for propagation of the killer toxin-encoding M1 double-stranded RNA satellite of the L-A double-stranded RNA virus%3B homologous to mammalian ribosomal protein L36A%2C no bacterial homolog%3B RPL42B has a pa	VIII	381990	382751	-	856544
3522	YIL052C	24186.5	1.50759	0.449075	5.55039e-05	0.000565607	RPL34B	Ribosomal 60S subunit protein L34B%3B homologous to mammalian ribosomal protein L34%2C no bacterial homolog%3B RPL34B has a paralog%2C RPL34A%2C that arose from the whole genome duplication [Source:SGD%3BAcc:S000001314]	IX	256226	257063	-	854759
4581	YLR048W	41234.7	1.48745	0.457093	8.033e-05	0.000779383	RPS0B	Protein component of the small (40S) ribosomal subunit%3B RPS0B has a paralog%2C RPS0A%2C that arose from the whole genome duplication%3B required for maturation of 18S rRNA along with Rps0Ap%3B deletion of either RPS0 gene reduces growth rate%2C deletio	XII	242232	243349	+	850737
1285	YDL061C	15542.8	1.48641	0.570231	0.000564549	0.00397479	RPS29B	Protein component of the small (40S) ribosomal subunit%3B homologous to mammalian ribosomal protein S29 and bacterial S14%3B RPS29B has a paralog%2C RPS29A%2C that arose from the whole genome duplication [Source:SGD%3BAcc:S000002219]	IV	340628	340798	-	851498
5110	YML056C	21086.7	1.47614	0.329578	6.03921e-07	1.1693e-05	IMD4	Inosine monophosphate dehydrogenase%3B catalyzes the rate-limiting step in the de novo synthesis of GTP%3B member of a four-gene family in S. cerevisiae%2C constitutively expressed%3B IMD4 has a paralog%2C IMD3%2C that arose from the whole genome duplica	XIII	162194	164176	-	854948
4687	YLR150W	35777.1	1.47409	0.398075	1.61697e-05	0.000197853	STM1	Protein required for optimal translation under nutrient stress%3B perturbs association of Yef3p with ribosomes%3B involved in TOR signaling%3B binds G4 quadruplex and purine motif triplex nucleic acid%3B helps maintain telomere structure%3B protein abund	XII	440467	441288	+	850843
4736	YLR183C	1809.13	1.47332	0.421633	3.53984e-05	0.000383901	TOS4	Putative transcription factor%2C contains Forkhead Associated domain%3B binds chromatin%3B involved in expression homeostasis%2C buffering of mRNA synthesis rate against gene dosage changes during S phase%3B target of SBF transcription factor%3B expressi	XII	520543	522012	-	850880
4751	YLR198C	180.537	1.46726	0.770823	0.0034903	0.0176607	NA	Dubious open reading frame%3B unlikely to encode a functional protein%2C based on available experimental and comparative sequence data%3B overlaps the verified gene SIK1/YLR197W [Source:SGD%3BAcc:S000004188]	XII	547286	547645	-	NA
3118	YGR280C	7644.52	1.46663	0.243716	1.55237e-10	7.60013e-09	PXR1	Essential protein involved in rRNA and snoRNA maturation%3B competes with TLC1 RNA for binding to Est2p%2C suggesting a role in negative regulation of telomerase%3B human homolog inhibits telomerase%3B contains a G-patch RNA interacting domain [Source:SG	VII	1050910	1051725	-	853197
5879	YNL303W	687.281	1.45536	0.69866	0.00223442	0.0123503	NA	Dubious open reading frame%3B unlikely to encode a functional protein%2C based on available experimental and comparative sequence data [Source:SGD%3BAcc:S000005247]	XIV	61510	61857	+	NA
6511	YOR312C	34143.9	1.45242	0.501987	0.000260081	0.00206777	RPL20B	Ribosomal 60S subunit protein L20B%3B homologous to mammalian ribosomal protein L18A%2C no bacterial homolog%3B RPL20B has a paralog%2C RPL20A%2C that arose from the whole genome duplication [Source:SGD%3BAcc:S000005839]	XV	900250	900767	-	854489
123	snR63	408.704	1.41415	0.379206	1.673e-05	0.000202452	NA	NA	NA	NA	NA	NA	9164876
1424	YDL191W	24654.4	1.41029	0.384795	1.96645e-05	0.000231576	RPL35A	Ribosomal 60S subunit protein L35A%3B homologous to mammalian ribosomal protein L35 and bacterial L29%3B RPL35A has a paralog%2C RPL35B%2C that arose from the whole genome duplication [Source:SGD%3BAcc:S000002350]	IV	117664	118517	+	851336
6015	YOL014W	524.415	1.38989	0.322966	1.42751e-06	2.43454e-05	NA	Putative protein of unknown function%3B mCherry fusion protein localizes to the cytosol and nucleus [Source:SGD%3BAcc:S000005374]	XV	299693	300067	+	854146
3626	YIL148W	30526.1	1.38803	0.369746	1.43053e-05	0.000179717	RPL40A	Ubiquitin-ribosomal 60S subunit protein L40A fusion protein%3B cleaved to yield ubiquitin and ribosomal protein L40A%3B ubiquitin may facilitate assembly of the ribosomal protein into ribosomes%3B homologous to mammalian ribosomal protein L40%2C no bacte	IX	68708	69528	+	854658
1969	YDR447C	22822.9	1.38689	1.24407	0.00791403	0.0334176	RPS17B	Ribosomal protein 51 (rp51) of the small (40s) subunit%3B homologous to mammalian ribosomal protein S17%2C no bacterial homolog%3B RPS17B has a paralog%2C RPS17A%2C that arose from the whole genome duplication%3B protein abundance increases in response t	IV	1354829	1355553	-	852058
6505	YOR306C	3547.55	1.37303	0.204909	2.01813e-12	1.47615e-10	MCH5	Plasma membrane riboflavin transporter%3B facilitates the uptake of vitamin B2%3B required for FAD-dependent processes%3B sequence similarity to mammalian monocarboxylate permeases%2C however mutants are not deficient in monocarboxylate transport [Source	XV	889867	891432	-	854483
6696	YPL090C	49849.9	1.37303	0.361599	1.22506e-05	0.000157819	RPS6A	Protein component of the small (40S) ribosomal subunit%3B homologous to mammalian ribosomal protein S6%2C no bacterial homolog%3B phosphorylated on S233 by Ypk3p in a TORC1-dependent manner%2C and on S232 in a TORC1/2-dependent manner by Ypk1/2/3p%3B RPS	XVI	377291	378395	-	856015
3609	YIL133C	31117.3	1.36352	0.457626	0.000218066	0.00178327	RPL16A	Ribosomal 60S subunit protein L16A%3B N-terminally acetylated%2C binds 5.8 S rRNA%3B transcriptionally regulated by Rap1p%3B homologous to mammalian ribosomal protein L13A and bacterial L13%3B RPL16A has a paralog%2C RPL16B%2C that arose from the whole g	IX	98527	99416	-	854673
5129	YML073C	17349.9	1.3605	0.533437	0.000742978	0.00498575	RPL6A	Ribosomal 60S subunit protein L6A%3B N-terminally acetylated%3B binds 5.8S rRNA%3B homologous to mammalian ribosomal protein L6%2C no bacterial homolog%3B RPL6A has a paralog%2C RPL6B%2C that arose from the whole genome duplication [Source:SGD%3BAcc:S000	XIII	123227	124172	-	854902
6431	YOR234C	14825.2	1.35549	0.665764	0.00243041	0.0132445	RPL33B	Ribosomal 60S subunit protein L33B%3B rpl33b null mutant exhibits normal growth while rpl33a rpl33b double null mutant is inviable%3B homologous to mammalian ribosomal protein L35A%2C no bacterial homolog%3B RPL33B has a paralog%2C RPL33A%2C that arose f	XV	778555	779405	-	854409
2130	YEL047C	7981.94	1.35471	0.38339	3.39769e-05	0.000370928	NA	Soluble fumarate reductase%3B required with isoenzyme Osm1p for anaerobic growth%3B may interact with ribosomes%2C based on co-purification experiments%3B authentic%2C non-tagged protein is detected in purified mitochondria in high-throughput studies%3B	V	65385	66797	-	856664
5353	YMR142C	48893.9	1.35352	0.463271	0.000262214	0.00208045	RPL13B	Ribosomal 60S subunit protein L13B%3B not essential for viability%3B homologous to mammalian ribosomal protein L13%2C no bacterial homolog%3B RPL13B has a paralog%2C RPL13A%2C that arose from the whole genome duplication [Source:SGD%3BAcc:S000004750]	XIII	550206	551207	-	855173
4039	YJR094W-A	23877.3	1.34612	0.419007	0.000104867	0.000962817	RPL43B	Ribosomal 60S subunit protein L43B%3B homologous to mammalian ribosomal protein L37A%2C no bacterial homolog%3B RPL43B has a paralog%2C RPL43A%2C that arose from the whole genome duplication%3B protein abundance increases in response to DNA replication s	X	608305	608858	+	853557
1306	YDL082W	26488.9	1.34529	0.422934	0.000117054	0.00105269	RPL13A	Ribosomal 60S subunit protein L13A%3B not essential for viability%3B homologous to mammalian ribosomal protein L13%2C no bacterial homolog%3B RPL13A has a paralog%2C RPL13B%2C that arose from the whole genome duplication [Source:SGD%3BAcc:S000002240]	IV	308424	309388	+	851477
4408	YKR057W	26621.1	1.33256	0.388168	4.97991e-05	0.000513836	RPS21A	Protein component of the small (40S) ribosomal subunit%3B homologous to mammalian ribosomal protein S21%2C no bacterial homolog%3B RPS21A has a paralog%2C RPS21B%2C that arose from the whole genome duplication [Source:SGD%3BAcc:S000001765]	XI	551657	552242	+	853931
4444	YKR092C	5704.96	1.32676	0.403687	8.39001e-05	0.000805478	SRP40	Nucleolar serine-rich protein%3B role in preribosome assembly or transport%3B may function as a chaperone of small nucleolar ribonucleoprotein particles (snoRNPs)%3B immunologically and structurally to rat Nopp140 [Source:SGD%3BAcc:S000001800]	XI	612665	613885	-	853967
6359	YOR167C	30712.2	1.32471	0.366749	2.6078e-05	0.000294969	RPS28A	Protein component of the small (40S) ribosomal subunit%3B has an extraribosomal function in regulation of RPS28B%2C in which Rps28Ap binds to a decapping complex via Edc3p%2C which then binds to RPS28B mRNA leading to its decapping and degradation%3B hom	XV	648804	649007	-	854338
1995	YDR471W	23427.2	1.32202	0.492642	0.00054018	0.00381955	RPL27B	Ribosomal 60S subunit protein L27B%3B homologous to mammalian ribosomal protein L27%2C no bacterial homolog%3B RPL27B has a paralog%2C RPL27A%2C that arose from the whole genome duplication [Source:SGD%3BAcc:S000002879]	IV	1401770	1402564	+	852082
5209	YMR011W	27146	1.31851	0.422217	0.000143791	0.00126378	HXT2	High-affinity glucose transporter of the major facilitator superfamily%3B expression is induced by low levels of glucose and repressed by high levels of glucose [Source:SGD%3BAcc:S000004613]	XIII	288079	289704	+	855023
2987	YGR159C	21454.2	1.30934	1.22923	0.00883896	0.0364351	NSR1	Nucleolar protein that binds nuclear localization sequences%3B required for pre-rRNA processing and ribosome biogenesis%3B binds to single stranded telomeric DNA and mRNA%3B methylated by Hmt1p%3B interaction with Top1p and nucleolar localization are neg	VII	806412	807656	-	853064
3849	YJL136C	27657.9	1.30886	0.301881	1.35997e-06	2.36674e-05	RPS21B	Protein component of the small (40S) ribosomal subunit%3B homologous to mammalian ribosomal protein S21%2C no bacterial homolog%3B RPS21B has a paralog%2C RPS21A%2C that arose from the whole genome duplication [Source:SGD%3BAcc:S000003672]	X	156550	157273	-	853305
3589	YIL114C	1573.59	1.30832	0.225267	6.32778e-10	2.57135e-08	POR2	Putative mitochondrial porin (voltage-dependent anion channel)%3B not required for mitochondrial membrane permeability or mitochondrial osmotic stability%3B POR2 has a paralog%2C POR1%2C that arose from the whole genome duplication [Source:SGD%3BAcc:S000	IX	149143	149988	-	854692
602	YBL027W	50950.3	1.30694	0.397127	8.39371e-05	0.000805478	RPL19B	Ribosomal 60S subunit protein L19B%3B rpl19a and rpl19b single null mutations result in slow growth%2C while the double null mutation is lethal%3B homologous to mammalian ribosomal protein L19%2C no bacterial homolog%3B RPL19B has a paralog%2C RPL19A%2C	II	168423	169376	+	852254
3280	YHR068W	9879.75	1.29805	0.212077	9.58648e-11	5.00856e-09	DYS1	Deoxyhypusine synthase%3B catalyzes formation of deoxyhypusine%2C the first step in hypusine biosynthesis%3B triggers posttranslational hypusination of translation elongation factor eIF-5A and regulates its intracellular levels%3B tetrameric%3B human hom	VIII	232133	233296	+	856465
899	YBR181C	38826	1.29639	0.421856	0.000174347	0.00146768	RPS6B	Protein component of the small (40S) ribosomal subunit%3B homologous to mammalian ribosomal protein S6%2C no bacterial homolog%3B phosphorylated on S233 by Ypk3p in a TORC1-dependent manner%2C and on S232 in a TORC1/2-dependent manner by Ypk1/2/3p%3B RPS	II	591712	592774	-	852479
1236	YDL014W	21440.1	1.29133	0.672769	0.00326879	0.0168113	NOP1	Histone glutamine methyltransferase%2C modifies H2A at Q105 in nucleolus%3B component of the small subunit processome complex%2C which is required for processing of pre-18S rRNA%3B ortholog of mammalian fibrillarin%3B inviability of the null mutant is fu	IV	427364	428347	+	851548
1305	YDL081C	42828.1	1.28822	0.366381	3.8742e-05	0.000412683	RPP1A	Ribosomal stalk protein P1 alpha%3B involved in the interaction between translational elongation factors and the ribosome%3B free (non-ribosomal) P1 stimulates the phosphorylation of the eIF2 alpha subunit (Sui2p) by Gcn2p%3B accumulation of P1 in the cy	IV	309802	310122	-	851478
4593	YLR060W	15435.9	1.28347	0.199051	1.19567e-11	7.59782e-10	FRS1	Beta subunit of cytoplasmic phenylalanyl-tRNA synthetase%3B forms a tetramer with Frs2p to generate active enzyme%3B able to hydrolyze mis-aminoacylated tRNA-Phe%2C which could contribute to translational quality control [Source:SGD%3BAcc:S000004050]	XII	260979	262766	+	850749
6490	YOR293W	34249.5	1.27698	0.504708	0.000854128	0.00562272	RPS10A	Protein component of the small (40S) ribosomal subunit%3B homologous to mammalian ribosomal protein S10%2C no bacterial homolog%3B RPS10A has a paralog%2C RPS10B%2C that arose from the whole genome duplication%3B mutations in the human homolog associated	XV	867098	867852	+	854468
6104	YOL097C	8360.49	1.27289	0.192793	4.36625e-12	2.93296e-10	WRS1	Cytoplasmic tryptophanyl-tRNA synthetase%3B aminoacylates tryptophanyl-tRNA%3B human homolog WARS can complement yeast null mutant [Source:SGD%3BAcc:S000005457]	XV	136527	137825	-	854056
2139	YEL054C	6372.96	1.27017	0.7363	0.00469426	0.022393	RPL12A	Ribosomal 60S subunit protein L12A%3B rpl12a rpl12b double mutant exhibits slow growth and slow translation%3B homologous to mammalian ribosomal protein L12 and bacterial L11%3B RPL12A has a paralog%2C RPL12B%2C that arose from the whole genome duplicati	V	52721	53218	-	856656
6687	YPL081W	7666.48	1.27003	0.666906	0.00346764	0.0176138	RPS9A	Protein component of the small (40S) ribosomal subunit%3B homologous to mammalian ribosomal protein S9 and bacterial S4%3B RPS9A has a paralog%2C RPS9B%2C that arose from the whole genome duplication [Source:SGD%3BAcc:S000006002]	XVI	404950	406044	+	856024
734	YBR031W	60143.3	1.26678	0.258018	9.20722e-08	2.22019e-06	RPL4A	Ribosomal 60S subunit protein L4A%3B N-terminally acetylated%3B homologous to mammalian ribosomal protein L4 and bacterial L4%3B RPL4A has a paralog%2C RPL4B%2C that arose from the whole genome duplication [Source:SGD%3BAcc:S000000235]	II	300166	301254	+	852319
4890	YLR325C	44181	1.26659	0.422559	0.000228448	0.00185893	RPL38	Ribosomal 60S subunit protein L38%3B homologous to mammalian ribosomal protein L38%2C no bacterial homolog [Source:SGD%3BAcc:S000004317]	XII	781143	781379	-	851035
4608	YLR075W	22068.8	1.26578	0.62172	0.00270021	0.0144751	RPL10	Ribosomal 60S subunit protein L10%3B homologous to mammalian ribosomal protein L10 and bacterial L16%3B responsible for joining the 40S and 60S subunits%3B regulates translation initiation%3B similar to members of the QM gene family%3B protein abundance	XII	282927	283592	+	850764
4680	YLR145W	1103.56	1.26554	0.213946	3.46285e-10	1.52837e-08	RMP1	Subunit of RNase MRP%3B RNase MRP processes pre-rRNA and has a role in cell cycle-regulated degradation of daughter cell-specific mRNAs%3B unlike most subunits%2C not shared between RNase MRP and nuclear RNase P [Source:SGD%3BAcc:S000004135]	XII	432168	432773	+	850837
5944	YNR025C	142.91	1.25434	0.386023	0.00010639	0.000975435	NA	Dubious open reading frame%3B unlikely to encode a functional protein%2C based on available experimental and comparative sequence data%3B deletion reduces expression of PIS1 gene encoding phosphatidylinositol synthase [Source:SGD%3BAcc:S000005308]	XIV	672702	673061	-	NA
5837	YNL264C	2733.4	1.25266	0.215446	4.06237e-10	1.73662e-08	PDR17	Phosphatidylinositol transfer protein (PITP)%3B downregulates Plb1p-mediated turnover of phosphatidylcholine%3B forms a complex with Psd2p which appears essential for maintenance of vacuolar PE levels%3B found in the cytosol and microsomes%3B homologous	XIV	145563	146615	-	855457
2684	YGL135W	44632.1	1.24968	0.631961	0.00308293	0.0160307	RPL1B	Ribosomal 60S subunit protein L1B%3B N-terminally acetylated%3B homologous to mammalian ribosomal protein L10A and bacterial L1%3B RPL1B has a paralog%2C RPL1A%2C that arose from the whole genome duplication%3B rpl1a rpl1b double null mutation is lethal	VII	254641	255294	+	852742
654	YBL072C	51928.5	1.24736	0.331755	1.61328e-05	0.000197769	RPS8A	Protein component of the small (40S) ribosomal subunit%3B homologous to mammalian ribosomal protein S8%2C no bacterial homolog%3B RPS8A has a paralog%2C RPS8B%2C that arose from the whole genome duplication [Source:SGD%3BAcc:S000000168]	II	88523	89125	-	852206
4309	YKL183C-A	81.7445	1.24098	0.528519	0.00143624	0.00866614	NA	Putative protein of unknown function%3B identified by fungal homology and RT-PCR [Source:SGD%3BAcc:S000028558]	XI	98395	98607	-	1500485
6686	YPL080C	260.26	1.23838	0.617371	0.00332948	0.0170834	NA	Putative protein of unknown function%3B conserved across S. cerevisiae strains [Source:SGD%3BAcc:S000006001]	XVI	406172	406498	-	856025
3309	YHR089C	12910.6	1.22852	0.632739	0.00339755	0.0173246	GAR1	Protein component of the H/ACA snoRNP pseudouridylase complex%3B involved in the modification and cleavage of the 18S pre-rRNA [Source:SGD%3BAcc:S000001131]	VIII	282681	283298	-	856489
497	YAL038W	64013	1.21667	0.521336	0.00149561	0.00894239	CDC19	Pyruvate kinase%3B functions as a homotetramer in glycolysis to convert phosphoenolpyruvate to pyruvate%2C the input for aerobic (TCA cycle) or anaerobic (glucose fermentation) respiration%3B regulated via allosteric activation by fructose bisphosphate%3	I	71786	73288	+	851193
1510	YDR025W	27736.4	1.21043	0.585038	0.00271306	0.0145073	RPS11A	Protein component of the small (40S) ribosomal subunit%3B homologous to mammalian ribosomal protein S11 and bacterial S17%3B N-terminally propionylated in vivo%3B RPS11A has a paralog%2C RPS11B%2C that arose from the whole genome duplication [Source:SGD%	IV	491515	492324	+	851589
649	YBL069W	783.368	1.20575	0.273566	1.11503e-06	1.98385e-05	AST1	Lipid raft associated protein%3B interacts with the plasma membrane ATPase Pma1p and has a role in its targeting to the plasma membrane by influencing its incorporation into lipid rafts%3B sometimes classified in the medium-chain dehydrogenase/reductases	II	90741	92030	+	852209
3283	YHR070C-A	157.377	1.20044	0.379631	0.000148373	0.00129369	NA	Dubious open reading frame%3B unlikely to encode a functional protein%2C based on available experimental and comparative sequence data%3B overlaps the verified gene TRM5/YHR070W [Source:SGD%3BAcc:S000028780]	VIII	236102	236512	-	NA
7039	YPR132W	37364	1.1953	0.381131	0.000160232	0.00136988	RPS23B	Ribosomal protein 28 (rp28) of the small (40S) ribosomal subunit%3B required for translational accuracy%3B homologous to mammalian ribosomal protein S23 and bacterial S12%3B RPS23B has a paralog%2C RPS23A%2C that arose from the whole genome duplication%3	XVI	794965	795767	+	856250
5075	YML024W	23777.8	1.19165	0.31856	1.86279e-05	0.00022135	RPS17A	Ribosomal protein 51 (rp51) of the small (40s) subunit%3B homologous to mammalian ribosomal protein S17%2C no bacterial homolog%3B RPS17A has a paralog%2C RPS17B%2C that arose from the whole genome duplication [Source:SGD%3BAcc:S000004486]	XIII	225889	226697	+	854984
3388	YHR163W	4009.89	1.18648	0.281229	2.6166e-06	4.09146e-05	SOL3	6-phosphogluconolactonase%3B catalyzes the second step of the pentose phosphate pathway%3B weak multicopy suppressor of los1-1 mutation%3B homologous to Sol2p and Sol1p%3B SOL3 has a paralog%2C SOL4%2C that arose from the whole genome duplication [Source	VIII	423724	424473	+	856568
4276	YKL152C	52745.5	1.18112	0.457078	0.000838413	0.00554454	GPM1	Tetrameric phosphoglycerate mutase%3B mediates the conversion of 3-phosphoglycerate to 2-phosphoglycerate during glycolysis and the reverse reaction during gluconeogenesis [Source:SGD%3BAcc:S000001635]	XI	163642	164385	-	853705
5012	YLR437C	1395.78	1.16511	0.262727	7.22863e-07	1.35573e-05	DIF1	Protein that regulates nuclear localization of Rnr2p and Rnr4p%3B phosphorylated by Dun1p in response to DNA damage and degraded%3B N-terminal half shows similarity to S. pombe Spd1 protein%3B DIF1 has a paralog%2C SML1%2C that arose from the whole genom	XII	1011622	1012023	-	851157
2023	YDR500C	19989.1	1.16332	0.31512	2.33179e-05	0.000267892	RPL37B	Ribosomal 60S subunit protein L37B%3B required for processing of 27SB pre-rRNA and formation of stable 66S assembly intermediates%3B protein abundance increases in response to DNA replication stress%3B homologous to mammalian ribosomal protein L37%2C no	IV	1450198	1450853	-	852111
5415	YMR194W	10646.6	1.16086	0.248062	3.27605e-07	6.84641e-06	RPL36A	Ribosomal 60S subunit protein L36A%3B N-terminally acetylated%3B binds to 5.8 S rRNA%3B homologous to mammalian ribosomal protein L36%2C no bacterial homolog%3B RPL36A has a paralog%2C RPL36B%2C that arose from the whole genome duplication [Source:SGD%3B	XIII	651145	651910	+	855232
3790	YJL080C	11048.4	1.15696	0.217011	1.14663e-08	3.38488e-07	SCP160	Essential RNA-binding G protein effector of mating response pathway%3B ligand-activated RNA-binding protein that delivers RNAs involved in polarization and perpetualizing mating signal to shmoo tip during pheromone signaling%3B Scp160p-mediated RNA traff	X	285558	289226	-	853365
3903	YJL188C	643.701	1.15126	0.298093	1.36811e-05	0.000173532	BUD19	Dubious open reading frame%3B unlikely to encode a functional protein%2C based on available experimental and comparative sequence data%3B not conserved in closely related Saccharomyces species%3B 88%25 of ORF overlaps the verified gene RPL39%3B diploid m	X	76202	76510	-	NA
1475	YDL241W	895.852	1.15031	0.327534	4.57024e-05	0.000476664	NA	Putative protein of unknown function%3B SWAT-GFP and mCherry fusion proteins localize to the endoplasmic reticulum%3B YDL241W is not an essential gene [Source:SGD%3BAcc:S000002400]	IV	20635	21006	+	851356
6092	YOL086C	232571	1.14827	0.509507	0.00198376	0.0111807	ADH1	Alcohol dehydrogenase%3B fermentative isozyme active as homo- or heterotetramers%3B required for the reduction of acetaldehyde to ethanol%2C the last step in the glycolytic pathway%3B ADH1 has a paralog%2C ADH5%2C that arose from the whole genome duplica	XV	159548	160594	-	854068
5340	YMR131C	9586.58	1.14759	0.522878	0.00227773	0.0125686	RRB1	Specific chaperone for ribosomal protein Rpl3p%3B binds to nascent Rpl3p during translation%3B essential gene [Source:SGD%3BAcc:S000004738]	XIII	533163	534698	-	855161
1143	YCR031C	40440	1.13611	0.33464	7.21448e-05	0.00070569	RPS14A	Protein component of the small (40S) ribosomal subunit%3B required for ribosome assembly and 20S pre-rRNA processing%3B mutations confer cryptopleurine resistance%3B homologous to mammalian ribosomal protein S14 and bacterial S11%3B RPS14A has a paralog%	III	177500	178220	-	850397
3252	YHR046C	1677.92	1.12629	0.353168	0.000149655	0.00129971	INM1	Inositol monophosphatase%3B involved in biosynthesis of inositol and in phosphoinositide second messenger signaling%3B INM1 expression increases in the presence of inositol and decreases upon exposure to antibipolar drugs lithium and valproate [Source:SG	VIII	197398	198285	-	856442
5734	YNL162W	26726.6	1.12189	0.390581	0.000405142	0.00301702	RPL42A	Ribosomal 60S subunit protein L42A%3B homologous to mammalian ribosomal protein L36A%2C no bacterial homolog%3B RPL42A has a paralog%2C RPL42B%2C that arose from the whole genome duplication [Source:SGD%3BAcc:S000005106]	XIV	331322	332154	+	855560
106	snR48	48.1536	1.11826	0.529991	0.00287201	0.0151737	NA	NA	NA	NA	NA	NA	9164898
1357	YDL130W	40113.9	1.11627	0.422996	0.000792545	0.00527002	RPP1B	Ribosomal protein P1 beta%3B component of the ribosomal stalk%2C which is involved in interaction of translational elongation factors with ribosome%3B free (non-ribosomal) P1 stimulates the phosphorylation of the eIF2 alpha subunit (Sui2p) by Gcn2p%3B ac	IV	229906	230527	+	851427
2443	YFL034C-A	3146.58	1.10978	0.399064	0.000543151	0.00383644	RPL22B	Ribosomal 60S subunit protein L22A%3B required for translation of long 5' UTR of IME1 mRNA and meiotic entry%3B homologous to mammalian ribosomal protein L22%2C no bacterial homolog%3B RPL22B has a paralog%2C RPL22A%2C that arose from the whole genome du	VI	64243	64932	-	850509
5634	YNL069C	45784.8	1.10906	0.358118	0.00020558	0.00169591	RPL16B	Ribosomal 60S subunit protein L16B%3B N-terminally acetylated%2C binds 5.8 S rRNA%3B transcriptionally regulated by Rap1p%3B homologous to mammalian ribosomal protein L13A and bacterial L13%3B RPL16B has a paralog%2C RPL16A%2C that arose from the whole g	XIV	493956	495001	-	855655
5025	YLR448W	11761.3	1.10897	0.458332	0.00142936	0.00863254	RPL6B	Ribosomal 60S subunit protein L6B%3B binds 5.8S rRNA%3B homologous to mammalian ribosomal protein L6%2C no bacterial homolog%3B RPL6B has a paralog%2C RPL6A%2C that arose from the whole genome duplication [Source:SGD%3BAcc:S000004440]	XII	1028854	1029768	+	851169
1496	YDR012W	33265.2	1.10799	0.402758	0.000588978	0.0041116	RPL4B	Ribosomal 60S subunit protein L4B%3B homologous to mammalian ribosomal protein L4 and bacterial L4%3B RPL4B has a paralog%2C RPL4A%2C that arose from the whole genome duplication [Source:SGD%3BAcc:S000002419]	IV	471853	472941	+	851575
2645	YGL097W	6055.83	1.10554	0.27179	5.5992e-06	7.90977e-05	SRM1	Nucleotide exchange factor for Gsp1p%3B localizes to the nucleus%2C required for nucleocytoplasmic trafficking of macromolecules%3B suppressor of the pheromone response pathway%3B potentially phosphorylated by Cdc28p%3B human homolog of the RAN GEF%2C RC	VII	321782	323230	+	852782
906	YBR187W	6350.96	1.10139	0.2111	2.28689e-08	6.32546e-07	GDT1	Calcium transporter localized to the cis- and medial-Golgi apparatus%3B required for protein glycosylation%3B GFP-fusion protein localizes to the vacuole%3B TMEM165%2C a human gene which causes Congenital Disorders of Glycosylation is orthologous and fun	II	602634	603476	+	852485
7008	YPR102C	33617.9	1.09055	0.3322	0.00011401	0.00102953	RPL11A	Ribosomal 60S subunit protein L11A%3B expressed at twice the level of Rpl11Bp%3B involved in ribosomal assembly%3B depletion causes degradation of 60S proteins and RNA%3B homologous to mammalian ribosomal protein L11 and bacterial L5%3B RPL11A has a para	XVI	731224	731748	-	856217
5552	YMR318C	9639.21	1.08371	0.24531	1.23768e-06	2.18436e-05	ADH6	NADPH-dependent medium chain alcohol dehydrogenase%3B has broad substrate specificity%3B member of the cinnamyl family of alcohol dehydrogenases%3B may be involved in fusel alcohol synthesis or in aldehyde tolerance%3B protein abundance increases in resp	XIII	911061	912143	-	855368
2515	YFR032C-B	291.8	1.07916	0.400965	0.000749143	0.00501689	NA	Putative protein of unknown function%3B identified by gene-trapping%2C microarray-based expression analysis%2C and genome-wide homology searching [Source:SGD%3BAcc:S000028630]	VI	223710	223973	-	1466402
5524	YMR296C	5885.31	1.07849	0.15091	1.22046e-13	1.18151e-11	LCB1	Component of serine palmitoyltransferase%3B responsible along with Lcb2p for the first committed step in sphingolipid synthesis%2C which is the condensation of serine with palmitoyl-CoA to form 3-ketosphinganine [Source:SGD%3BAcc:S000004911]	XIII	859215	860891	-	855342
4750	YLR197W	16760	1.05878	0.696151	0.00861896	0.0357973	NOP56	Essential evolutionarily-conserved nucleolar protein%3B component of the box C/D snoRNP complexes that direct 2'-O-methylation of pre-rRNA during its maturation%3B overexpression causes spindle orientation defects [Source:SGD%3BAcc:S000004187]	XII	546097	547611	+	850894
5464	YMR242C	31728.4	1.05868	0.481813	0.00260085	0.0140455	RPL20A	Ribosomal 60S subunit protein L20A%3B homologous to mammalian ribosomal protein L18A%2C no bacterial homolog%3B RPL20A has a paralog%2C RPL20B%2C that arose from the whole genome duplication [Source:SGD%3BAcc:S000004855]	XIII	753225	753742	-	855283
5661	YNL096C	11026.9	1.05818	0.210113	6.31999e-08	1.59404e-06	RPS7B	Protein component of the small (40S) ribosomal subunit%3B interacts with Kti11p%3B deletion causes hypersensitivity to zymocin%3B homologous to mammalian ribosomal protein S7%2C no bacterial homolog%3B RPS7B has a paralog%2C RPS7A%2C that arose from the	XIV	443398	444315	-	855628
5007	YLR432W	14810.9	1.05736	0.352478	0.000304079	0.00236334	IMD3	Inosine monophosphate dehydrogenase%3B catalyzes the rate-limiting step in the de novo synthesis of GTP%3B member of a four-gene family in S. cerevisiae%2C constitutively expressed%3B IMD3 has a paralog%2C IMD4%2C that arose from the whole genome duplica	XII	1002557	1004128	+	851152
520	YAL059W	1371.66	1.04974	0.368803	0.000493768	0.00355632	ECM1	Pre-ribosomal factor involved in 60S ribosomal protein subunit export%3B associates with the pre-60S particle%3B shuttles between the nucleus and cytoplasm [Source:SGD%3BAcc:S000000055]	I	36509	37147	+	851240
2943	YGR118W	34914.7	1.04842	0.250418	3.64638e-06	5.44311e-05	RPS23A	Ribosomal protein 28 (rp28) of the small (40S) ribosomal subunit%3B required for translational accuracy%3B homologous to mammalian ribosomal protein S23 and bacterial S12%3B RPS23A has a paralog%2C RPS23B%2C that arose from the whole genome duplication%3	VII	726974	727730	+	853015
1968	YDR446W	91.5354	1.03971	0.668043	0.00877346	0.0362724	ECM11	Meiosis-specific protein%3B component of the Synaptonemal Complex (SC) along with Gmc2p%3B required for efficient crossover formation and for the efficient loading of the SC transverse filament protein%2C Zip1p%3B is SUMOlytaed in a Gmc2p manner%2C and S	IV	1353725	1354633	+	852057
5630	YNL067W	18830.9	1.02993	0.345879	0.00033944	0.00259226	RPL9B	Ribosomal 60S subunit protein L9B%3B homologous to mammalian ribosomal protein L9 and bacterial L6%3B RPL9B has a paralog%2C RPL9A%2C that arose from a single-locus duplication [Source:SGD%3BAcc:S000005011]	XIV	499681	500256	+	855658
6048	YOL045W	3750.05	1.02594	0.327298	0.00020736	0.00170631	PSK2	PAS-domain containing serine/threonine protein kinase%3B regulates sugar flux and translation in response to an unknown metabolite by phosphorylating Ugp1p and Gsy2p (sugar flux) and Caf20p%2C Tif11p and Sro9p (translation)%3B PSK2 has a paralog%2C PSK1%	XV	243497	246802	+	854111
3101	YGR264C	12185.4	1.01628	0.252804	7.82442e-06	0.000106863	MES1	Methionyl-tRNA synthetase%3B forms a complex with glutamyl-tRNA synthetase (Gus1p) and Arc1p%2C which increases the catalytic efficiency of both tRNA synthetases%3B also has a role in nuclear export of tRNAs%3B mutations in human ortholog MARS are associ	VII	1019598	1021853	-	853181
2739	YGL189C	46778.4	1.01591	0.314544	0.000153795	0.00132121	RPS26A	Protein component of the small (40S) ribosomal subunit%3B homologous to mammalian ribosomal protein S26%2C no bacterial homolog%3B RPS26A has a paralog%2C RPS26B%2C that arose from the whole genome duplication%3B human homolog can partially complement an	VII	148229	148588	-	852686
5444	YMR223W	1877.07	1.01409	0.148287	1.19884e-12	8.96814e-11	UBP8	Ubiquitin-specific protease component of the SAGA acetylation complex%3B required for SAGA (Spt-Ada-Gcn5-Acetyltransferase)-mediated deubiquitination of histone H2B [Source:SGD%3BAcc:S000004836]	XIII	716715	718130	+	855263
4199	YKL081W	25750.3	1.01203	0.253178	8.65145e-06	0.000116946	TEF4	Gamma subunit of translational elongation factor eEF1B%3B stimulates the binding of aminoacyl-tRNA (AA-tRNA) to ribosomes by releasing eEF1A (Tef1p/Tef2p) from the ribosomal complex [Source:SGD%3BAcc:S000001564]	XI	282891	284455	+	853781
3594	YIL118W	4954.52	1.01152	0.169006	3.185e-10	1.42632e-08	RHO3	Non-essential small GTPase of the Rho/Rac family of Ras-like proteins%3B involved in the establishment of cell polarity%3B GTPase activity positively regulated by the GTPase activating protein (GAP) Rgd1p [Source:SGD%3BAcc:S000001380]	IX	139752	140447	+	854688
2413	YFL010W-A	88.3382	1.00611	0.450806	0.00265143	0.0142718	AUA1	Protein required for the negative regulation by ammonia of Gap1p%3B Gap1p is a general amino acid permease [Source:SGD%3BAcc:S000001955]	VI	114990	115274	+	850537
6975	YPR069C	7401.12	1.00381	0.220045	7.20615e-07	1.35537e-05	SPE3	Spermidine synthase%3B involved in biosynthesis of spermidine and also in biosynthesis of pantothenic acid%3B spermidine is required for growth of wild-type cells [Source:SGD%3BAcc:S000006273]	XVI	684556	685437	-	856182
4879	YLR314C	9728.53	1.00227	0.264228	2.00839e-05	0.000235198	CDC3	Component of the septin ring that is required for cytokinesis%3B septins are GTP-binding proteins that assemble with other septins into rod-like complexes that can associate with other rods to form filament polymers%3B septin rings at the mother-bud neck	XII	762575	764137	-	851024
6001	YOL002C	4530.8	1.00194	0.36463	0.000707846	0.00477433	IZH2	Plasma membrane receptor for plant antifungal osmotin%3B involved in zinc ion homeostasis%2C apoptosis%3B negatively regulates ZRT1 and other functionally divergent genes through CCCTC promoter motif (IzRE)%3B modulates FET3 activity in iron-independent	XV	323411	324364	-	854160
5821	YNL248C	9161.22	1.00063	0.824724	0.0131968	0.0503037	RPA49	RNA polymerase I subunit A49%3B essential for nucleolar assembly and for high polymerase loading rate%3B required for nucleolar localization of Rpa34p [Source:SGD%3BAcc:S000005192]	XIV	181361	182608	-	855473
2882	YGR060W	20746.9	-1.03616	0.172684	2.87401e-10	1.3048e-08	ERG25	C-4 methyl sterol oxidase%3B catalyzes the first of three steps required to remove two C-4 methyl groups from an intermediate in ergosterol biosynthesis%3B mutants accumulate the sterol intermediate 4%2C4-dimethylzymosterol%3B human MSMO1 functionally co	VII	610564	611493	+	852951

## Sheet: cluster 7 (n=21)
	GeneID	baseMean	log2FoldChange	lfcSE	pvalue	padj	GeneName	Description	Chromosome	Start	Stop	Strand	Entrez_ID
5211	YMR013C	950.61	1.21794	0.220746	3.80784e-09	1.26137e-07	SEC59	Dolichol kinase%3B catalyzes the terminal step in dolichyl monophosphate (Dol-P) biosynthesis%3B required for viability and for normal rates of lipid intermediate synthesis and protein N-glycosylation [Source:SGD%3BAcc:S000004615]	XIII	295179	296738	-	855026
4486	YLL024C	89342.3	1.57177	0.353704	6.65998e-07	1.2708e-05	SSA2	HSP70 family ATP-binding protein%3B involved in protein folding%2C vacuolar import of proteins%3B required for ubiquitin-dependent degradation of short-lived proteins%3B associated with chaperonin-containing T-complex%3B 98%25 identical to paralog Ssa1p	XII	95566	97485	-	850636
1238	YDL016C	537.189	1.00809	0.304554	0.000118468	0.0010625	NA	Dubious open reading frame%3B unlikely to encode a functional protein%2C based on available experimental and comparative sequence data%3B partially overlaps the verified ORF CDC7/YDL153C%2C the catalytic subunit of a complex that regulates DNA replicatio	IV	425570	425872	-	NA
6487	YOR291W	3386.49	1.06423	0.295933	3.88519e-05	0.000413185	YPK9	Vacuolar protein with a possible role in sequestering heavy metals%3B has similarity to the type V P-type ATPase Spf1p%3B homolog of human ATP13A2 (PARK9)%2C mutations in which are associated with Parkinson disease and Kufor-Rakeb syndrome [Source:SGD%3B	XV	861175	865593	+	854466
4046	YJR101W	4054.34	1.26746	0.2159	4.5752e-10	1.91838e-08	RSM26	Mitochondrial ribosomal protein of the small subunit [Source:SGD%3BAcc:S000003862]	X	618234	619034	+	853565
3253	YHR047C	5346.36	1.40457	0.25662	4.02157e-09	1.3237e-07	AAP1	Arginine/alanine amino peptidase%3B overproduction stimulates glycogen accumulation%3B AAP1 has a paralog%2C APE2%2C that arose from the whole genome duplication [Source:SGD%3BAcc:S000001089]	VIII	198740	201310	-	856443
2537	YFR052C-A	651.161	2.44479	1.04412	0.000685947	0.00466443	NA	Dubious open reading frame%3B unlikely to encode a functional protein%2C based on available experimental and comparative sequence data%3B overlaps ORF HXK1/YFR053C [Source:SGD%3BAcc:S000028768]	VI	253429	253734	-	NA
3249	YHR043C	4565.87	1.37915	0.43557	0.000119008	0.00106589	DOG2	2-deoxyglucose-6-phosphate phosphatase%3B member of a family of low molecular weight phosphatases%2C induced by oxidative and osmotic stress%2C confers 2-deoxyglucose resistance when overexpressed%3B DOG2 has a paralog%2C DOG1%2C that arose from a single	VIII	192805	193545	-	856439
2881	YGR059W	244.826	1.09485	0.482792	0.00211614	0.0117756	SPR3	Sporulation-specific homolog of the CDC3/10/11/12 family of genes%3B septin protein involved in sporulation%3B regulated by ABFI%3B the yeast CDC3/10/11/12 family is a family of bud neck microfilament genes [Source:SGD%3BAcc:S000003291]	VII	607563	609101	+	852950
3125	YGR287C	723.638	1.48374	0.364317	3.59398e-06	5.38934e-05	IMA1	Major isomaltase (alpha-1%2C6-glucosidase/alpha-methylglucosidase)%3B required for isomaltose utilization%3B preferred specificity for isomaltose%2C alpha-methylglucoside%2C and palatinose%2C but also exhibits alpha-1%2C2 glucosidase activity on sucrose	VII	1067222	1068991	-	853204
754	YBR051W	40.2894	1.1531	0.757642	0.00778866	0.0329958	NA	Dubious open reading frame%3B unlikely to encode a functional protein%2C based on available experimental and comparative sequence data%3B partially overlaps the REG2/YBR050C regulatory subunit of the Glc7p type-1 protein phosphatase [Source:SGD%3BAcc:S00	II	337988	338338	+	NA
5413	YMR194C-A	184.887	1.03261	0.314705	0.00012639	0.00112436	NA	Dubious open reading frame%3B unlikely to encode a functional protein%2C based on available experimental and comparative sequence data [Source:SGD%3BAcc:S000007250]	XIII	652912	653136	-	NA
3439	YHR207C	3469.48	1.19207	0.201024	3.48254e-10	1.52837e-08	SET5	Methyltransferase involved in methylation of histone H4 Lys5%2C -8%2C -12%3B S-adenosylmethionine-dependent%3B zinc-finger protein%2C contains one canonical and two unusual fingers in unusual arrangements%3B deletion enhances replication of positive-stra	VIII	514905	516485	-	856614
3312	YHR092C	16087.6	7.41722	1.128	2.15237e-12	1.52355e-10	HXT4	High-affinity glucose transporter%3B member of the major facilitator superfamily%2C expression is induced by low levels of glucose and repressed by high levels of glucose%3B HXT4 has a paralog%2C HXT7%2C that arose from the whole genome duplication [Sour	VIII	287081	288811	-	856492
1119	YCR012W	145237	1.14042	0.424476	0.000673372	0.00459835	PGK1	3-phosphoglycerate kinase%3B catalyzes transfer of high-energy phosphoryl groups from the acyl phosphate of 1%2C3-bisphosphoglycerate to ADP to produce ATP%3B key enzyme in glycolysis and gluconeogenesis [Source:SGD%3BAcc:S000000605]	III	137746	138996	+	850370
5631	YNL067W-A	18.0915	1.7557	1.04368	0.00346361	0.0176069	YNL067W-A	Dubious open reading frame%3B unlikely to encode a functional protein%2C based on available experimental and comparative sequence data [Source:SGD%3BAcc:S000007623]	XIV	498538	498684	+	NA
2871	YGR049W	1954.17	1.32776	0.331202	5.49778e-06	7.7832e-05	SCM4	Mitochondrial outer membrane protein of unknown function%3B predicted to have 4 transmembrane segments%3B import is mediated by Tom70p and Mim1p%3B interacts genetically with a cdc4 mutation%3B SCM4 has a paralog%2C ATG33%2C that arose from the whole gen	VII	591314	591877	+	852940
5777	YNL204C	665.783	1.39985	0.462921	0.000184183	0.00153868	SPS18	Protein of unknown function%2C contains a putative zinc-binding domain%3B expressed during sporulation%3B SPS18 has a paralog%2C GCS1%2C that arose from the whole genome duplication [Source:SGD%3BAcc:S000005148]	XIV	258375	259277	-	855517
6496	YOR298W	1198.86	1.24621	0.365735	6.01676e-05	0.000606559	MUM3	Protein of unknown function involved in outer spore wall organization%3B has similarity to the tafazzins superfamily of acyltransferases [Source:SGD%3BAcc:S000005824]	XV	875599	877038	+	854473
2134	YEL050W-A	49.5194	1.42668	0.404708	3.26878e-05	0.000360504	NA	Dubious open reading frame unlikely to encode a functional protein%3B identified by fungal homology and RT-PCR [Source:SGD%3BAcc:S000028545]	V	59549	59740	+	NA
1346	YDL119C	764.379	1.08847	0.302517	3.71169e-05	0.00039925	HEM25	Mitochondrial glycine transporter%3B required for the transport of glycine into mitochondria for initiation of heme biosynthesis%2C with YMC1 acting as a secondary transporter%3B homolog of human SLC25A38%2C a mitochondrial glycine transporter associated	IV	246689	247612	-	851439
